# Supplementary material for: Visualizing the evolution of evidence: Cumulative network meta‐analyses of new generation antidepressants in the last 40 years
Source: PubMed Central journal article supplement — Res Synth Methods. 2020 May 25;12(1):74–85. doi: 10.1002/jrsm.1413 (PMC7818396; doi:10.1002/jrsm.1413), 2020-05-25
Supplement: JRSM-12-74-s001.pdf [file JRSM-12-74-s001.pdf]

# **Visualizing the Evolution of Evidence: Cumulative Network Meta-Analyses of New Generation Antidepressants in the Last 40 Years**

Yan Luo, Anna Chaimani, Toshi A Furukawa, Yuki Kataoka, Yusuke Ogawa, Andrea Cipriani, Georgia Salanti

## Supplementary Appendix

## Contents

|       |                                                                        |    |
|-------|------------------------------------------------------------------------|----|
| 1     | Assessment of the confidence in the evidence through CINeMA.....       | 3  |
| 2     | Study selection process .....                                          | 5  |
| 3     | Reference list of included studies.....                                | 6  |
| 4     | Characteristics of included studies.....                               | 27 |
| 5     | Risk of bias table of included studies.....                            | 45 |
| 6     | Results of network meta-analysis .....                                 | 52 |
| 6.1   | Network diagrams for acceptability.....                                | 52 |
| 6.2   | Forest plots.....                                                      | 53 |
| 6.2.1 | Efficacy.....                                                          | 53 |
| 6.2.2 | Acceptability.....                                                     | 53 |
| 6.3   | Cumulative forest plots over the years for each drug in efficacy ..... | 54 |
| 6.4   | Comparison-adjusted funnel plots.....                                  | 56 |
| 6.4.1 | Efficacy.....                                                          | 56 |
| 6.4.2 | Acceptability.....                                                     | 57 |
| 7     | Quality of evidence (GRADE) tables based on CINeMA.....                | 58 |
| 7.1   | Efficacy .....                                                         | 58 |
| (1)   | 1990.....                                                              | 58 |
| (2)   | 1995.....                                                              | 59 |
| (3)   | 2000.....                                                              | 61 |
| (4)   | 2005.....                                                              | 64 |
| (5)   | 2010.....                                                              | 68 |
| (6)   | 2016.....                                                              | 72 |
| 7.2   | Acceptability.....                                                     | 76 |
| (1)   | 1990 .....                                                             | 76 |
| (2)   | 1995 .....                                                             | 77 |
| (3)   | 2000 .....                                                             | 79 |
| (4)   | 2005 .....                                                             | 82 |
| (5)   | 2010 .....                                                             | 86 |
| (6)   | 2016 .....                                                             | 90 |
| 8     | Exemplar screen shots of the Shiny application.....                    | 95 |

## 1 Assessment of the confidence in the evidence through CINeMA

The confidence in the evidence provided by NMA at each time point was assessed using the CINeMA (Confidence in Network Meta-Analysis) framework<sup>1,2</sup> through the dedicated software<sup>3</sup>. The confidence in each NMA  $OR_{AB}$  between two given drugs A and B was evaluated for six domains. The software required some input in each domain in order to recommend whether there were “major concerns”, “some concerns” or “no concerns” for the particular domain.

- (1) **Within-trial bias:** we estimated it as the weighted average of the overall risk of bias of all the trials contributing information to the estimation of  $OR_{AB}$ .
- (2) **Reporting bias:** also known as “publication bias”. We considered comparisons that involved amitriptyline, clomipramine, fluvoxamine, milnacipran and trazadone to have “suspected” publication bias. This is because, for these drugs, neither FDA nor company reports were available. Other drugs were rated as “undetected bias”.
- (3) **Indirectness:** since the included studies matched the clinical question of the review, we had “no concern” about any of the evaluated  $OR_{AB}$ .
- (4) **Imprecision:** which was rated based on whether the 95% CI of OR was allowing recommendations to be made. We set the margin of equivalent effects (where none of the drugs is favored) to be between OR 0.8 and 1.25<sup>4</sup>. These values were motivated by the fact that assuming 50% response rate for drug B, then an  $OR_{AB}$  of 1.25 indicated a response rate more than 56% for drug A, which we considered as clinically meaningful. Then, the degree of overlap between the 95% CI of  $OR_{AB}$  and the margin of equivalent effects suggests the judgement. For details see the manuscript of Nikolakopoulou et al<sup>5</sup>.
- (5) **Heterogeneity:** this was evaluated by monitoring the agreement between confidence intervals (CIs) and prediction intervals (PIs). CINeMA judges whether the two intervals and their overlap with the margin of equivalent effects provide similar conclusions.
- (6) **Incoherence:** this was evaluated by monitoring the level of disagreement between confidence intervals (CIs) of the direct and indirect  $OR_{AB}$  and their overlap with the margin of equivalent effects<sup>5</sup>.

After the judgement for all the six domains, we summarized the overall confidence in evidence for each OR between any two drugs into high, moderate, low and very low. Starting with high confidence, we went one level down for each ‘major concern’ in any of the six domains; then two thirds level down for ‘some concerns’ in ‘within-study bias’; one third level down for each ‘some concerns’ in any of the other five domains. To obtain the final level, we rounded the number of downgradings to their nearest integer. For each drug, we calculated the percentage of the four levels based on all comparisons including that drug, combining both efficacy and acceptability.

**Reference:**

1. Salanti G, Del Giovane C, Chaimani A, Caldwell DM, Higgins JP. Evaluating the quality of evidence from a network meta-analysis. *PLoS One*. 2014;9(7):e99682.
2. Papakonstantinou T, Nikolakopoulou A, Higgins JPT, Egger M, Salanti G. CINeMA: Software for semi-automated assessment of the Confidence In the results of Network Meta-Analysis. [https://cinema.ispm.unibe.ch/model/CINeMA\\_manual.pdf](https://cinema.ispm.unibe.ch/model/CINeMA_manual.pdf). Accessed November 14th., 2019.
3. CINeMA: Confidence in Network Meta-Analysis [Software]. Institute of Social and Preventive Medicine , University of Bern, 2017. Available from [cinema.ispm.unibe.ch](http://cinema.ispm.unibe.ch). Accessed August, 2019.
4. Cipriani A, Furukawa TA, Salanti G, et al. Comparative efficacy and acceptability of 21 antidepressant drugs for the acute treatment of adults with major depressive disorder: a systematic review and network meta-analysis. *Lancet*. 2018;391(10128):1357-1366.
5. Nikolakopoulou A, Higgins JPT, Papakonstantinou T, et al. Assessing Confidence in the Results of Network Meta-Analysis (Cinema). *bioRxiv*. 2019:597047.



## 2 Study selection process

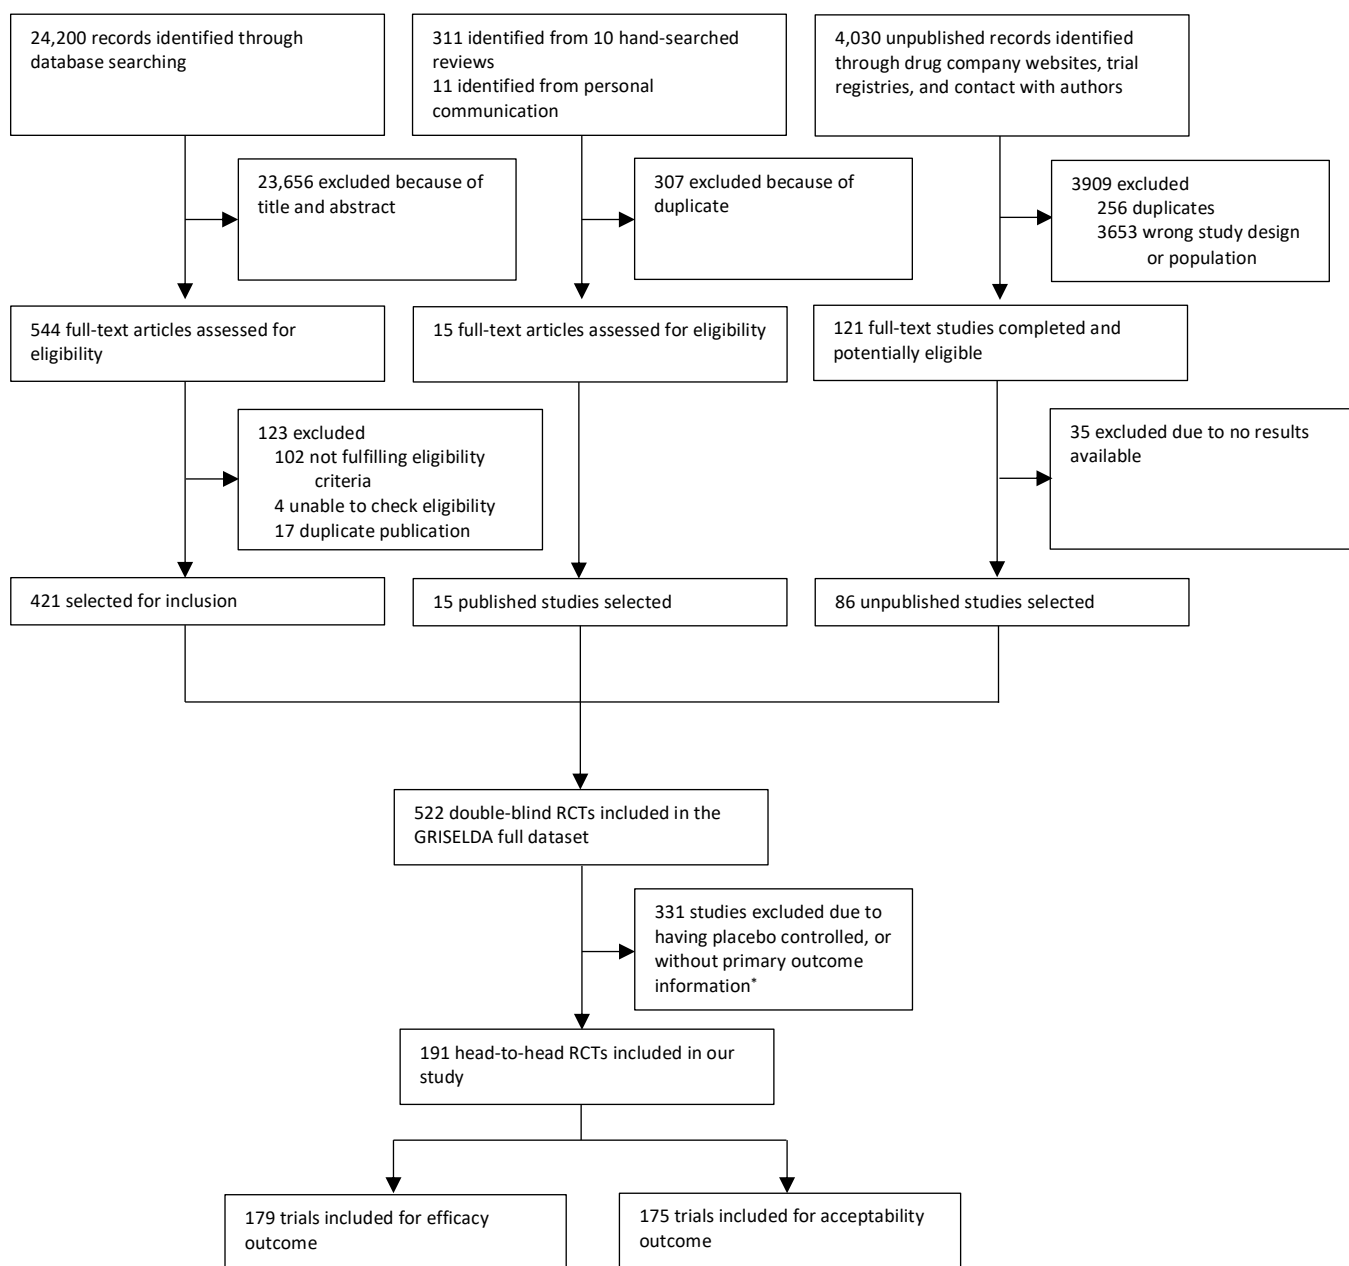

**eFigure 1. Flow chart for study selection process.** \*Primary outcome refers to efficacy in terms of response rate and acceptability in terms of all-cause discontinuation rate. Please refer to the main text for more information.

### 3 Reference list of included studies

#### 1. Aberg-Wistedt 2000

- Aberg-Wistedt A, Agren H, Ekselius L, Bengtsson F, Akerblad AC. Sertraline versus paroxetine in major depression: clinical outcome after six months of continuous therapy. *J Clin Psychopharmacol.* 2000;20(6):645-52.

#### 2. Aguglia 1993

- Aguglia E, Casacchia M, Cassano GB, Faravelli C, Ferrari G, Giordano P, Pancheri P, Ravizza L, Trabucchi M, Bolino F, Scarpato A, Berardi D, Provenzano G, Brugnoli R, Rozzini R. Double-blind study of the efficacy and safety of sertraline versus fluoxetine in major depression. *Int Clin Psychopharmacol.* 1993;8(3):197-202.

#### 3. Allard 2004

- Allard P, Gram L, Timdahl K, Behnke K, Hanson M, Sogaard J. Efficacy and tolerability of venlafaxine in geriatric outpatients with major depression: a double-blind, randomised 6-month comparative trial with citalopram. *Int J Geriatr Psychiatry.* 2004;19(12):1123-30.

#### 4. Altamura 1989b

- Altamura AC, Mauri MC, Rudas N, Carpiello B, Montanini R, Perini M, Scapicchio PL, Hadjchristos C, Carucci G, Minervini M, D'Aloise A, Malinconico A, Aguglia E, De Vanna R, D'Aronco R. Clinical activity and tolerability of trazodone, mianserin, and amitriptyline in elderly subjects with major depression: a controlled multicenter trial. *Clin Neuropharmacol.* 1989;12 Suppl 1:S25-33; S34-7.

#### 5. Alves 1999

- Alves C, Cachola I, Brandao J. Efficacy and tolerability of venlafaxine and fluoxetine in outpatients with major depression. *Primary Care Psychiatry.* 1999;5, 57-63.

#### 6. Amini 2005

- Amini H, Aghayan S, Jalili SA, Akhondzadeh S, Yahyazadeh O, Pakravan-Nejad M. Comparison of mirtazapine and fluoxetine in the treatment of major depressive disorder: a double-blind, randomized trial. *J Clin Pharmacy and Therapeutics.* 2005;30(2):133-138.

#### 7. Andersen 1986

- Danish University Antidepressant Group. Citalopram: clinical effect profile in comparison with clomipramine. A controlled multicenter study. *Psychopharmacology.* 1986;90(1): 131-138.

#### 8. Anseau 1989a

- Anseau M, von Frenckell R, Mertens C, de Wilde J, Botte L, Devoitille JM, Evrard JL, De Nayer A, Darimont P, Dejaiffe G, Mirel J, Meurice E, Parent M, Couzinier JP, Demarez JP, Serre C. Controlled comparison of two doses of milnacipran (F 2207) and amitriptyline in major depressive inpatients. *Psychopharmacology.* 1989;98(2):163-8.

#### **9. Anseau 1989b**

- Anseau M, von Frenckell R, Papart P, Mertens C, de Wilde J, Botte L, Devoitille JM, Evrard JL, De Nayer, Couzinier JP, Demarez JP, Serre C. A Controlled comparison of milnacipran (F2207) 200 mg and amitriptyline in endogenous depressive inpatients. *Human Psychopharmacology*. 1989;4(3):221-227.

#### **10. Anseau 1991**

- Anseau M, von Frenckell R, Gérard MA, Mertens C, De Wilde J, Botte L, Devoitille JM, Evrard JL, De Nayer A, Darimont P, Mirel J, Troisfontaines B, Toussaint C, Couzinier JP, Demarez JP, Serre C. Interest of a loading dose of milnacipran in endogenous depressive inpatients. Comparison with the standard regimen and with fluvoxamine. *Eur Neuropsychopharmacol*. 1991;1(2):113-21.

#### **11. Anseau 1994a (MY-1005/BRL-029060/1/CPMS-112)**

- Anseau M, Gabriëls A, Loyens J, Bartholomé F, Evrard JL, De Nayer A, Linhart R, Wirtz J, Bruynooghe F, Surinx K, Clarysse H, Marganne R, Papart P. Controlled comparison of paroxetine and fluvoxamine in major depression. *Human Psychopharmacology: Clinical and Experimental*. 1994;9(5):329-336.
- <https://www.gsk-clinicalstudyregister.com/study/29060/112?search=study&#rs>

#### **12. Anseau 1994b**

- Anseau M, Papart P, Troisfontaines B, Bartholomé F, Bataille M, Charles G, Schittecatte M, Darimont P, Devoitille JM, De Wilde J, Dufasne M, Gilson H, Evrard JL, De Nayer A, Krémer P, Mertens C, Serre C. Controlled comparison of milnacipran and fluoxetine in major depression. *Psychopharmacology*. 1994;114:131-7.

#### **13. Armitage 1997**

- Armitage R, Yonkers K, Cole DBA, Rush, JA. A Multicenter, Double-Blind Comparison of the Effects of Nefazodone and Fluoxetine on Sleep Architecture and Quality of Sleep in Depressed Outpatients. *J Clin Psychopharmacology*. 1997;17(3)161-168.

#### **14. Baldwin 1996**

- Baldwin DS, Hawley CJ, Abed RT, Maragakis BP, Cox J, Buckingham SA, Pover GH, Ascher A. A multicenter double-blind comparison of nefazodone and paroxetine in the treatment of outpatients with moderate-to-severe depression. *J Clin Psychiatry*. 1996;57 Suppl 2:46-52.

#### **15. Baldwin 2006a (97-CRBX-052 - Study 052)**

- Baldwin D, Bridgman K, Buis C. Resolution of sexual dysfunction during double-blind treatment of major depression with reboxetine or paroxetine. *J Psychopharmacol*. 2006 Jan;20(1):91-6. Epub 2005 Oct 4.
- [https://www.iqwig.de/download/Studie\\_052.pdf](https://www.iqwig.de/download/Studie_052.pdf)

**16. Baldwin 2006b (Study 99505)**

- Baldwin DS, Cooper JA, Huusom AK, Hindmarch I. A double-blind, randomized, parallel-group, flexible-dose study to evaluate the tolerability, efficacy and effects of treatment discontinuation with escitalopram and paroxetine in patients with major depressive disorder. *Int Clin Psychopharmacol.* 2006 May;21(3):159-69.
- [http://www.lundbeck.com/upload/trials/files/pdf/completed/99505%20\\_14June2006\\_Final%20for%20upload\\_CTRS.pdf](http://www.lundbeck.com/upload/trials/files/pdf/completed/99505%20_14June2006_Final%20for%20upload_CTRS.pdf)

**17. Battegay 1985 (PAR 29060.309 HP/81/162A)**

- Battegay R, Hager M, Rauchfleisch U. Double-blind comparative study of paroxetine and amitriptyline in depressed patients of a university psychiatric outpatient clinic (pilot study). *Neuropsychobiology.* 1985;13(1-2):31-7.
- <https://www.gsk-clinicalstudyregister.com/study/29060/309?search=compound&compound=paroxetine#rs>

**18. Beasley 1991**

- Beasley CM Jr, Dornseif BE, Pultz JA, Bosomworth JC, Sayler ME. Fluoxetine versus trazodone: efficacy and activating-sedating effects. *J Clin Psychiatry.* 1991 Jul;52:294-9.

**19. Behnke 2003 (E-1690, Kjernisted2002)**

- Behnke K, Søgaard J, Martin S, Bäuml J, Ravindran AV, Agren H, Vester-Blokland ED. Mirtazapine orally disintegrating tablet versus sertraline: a prospective onset of action study. *J Clin Psychopharmacol.* 2003 Aug;23(4):358-64.

**20. Benkert 2000 (E-1559)**

- Benkert O, Szegedi A, Kohlen R. Mirtazapine compared with paroxetine in major depression. *J Clin Psychiatry.* 2000 Sep;61(9):656-63.

**21. Benkert 2006(C-1763)**

- [https://www.iqwig.de/download/A05-20C\\_Abschlussbericht\\_Bupropion\\_Mirtazapin\\_und\\_Reboxetin\\_bei\\_Depressionen.pdf](https://www.iqwig.de/download/A05-20C_Abschlussbericht_Bupropion_Mirtazapin_und_Reboxetin_bei_Depressionen.pdf)

**22. Bennie 1995**

- Bennie EH, Mullin JM, Martindale JJ. A double-blind multicentre trial comparing sertraline and fluoxetine in outpatients with major depression. *J Clin Psychiatry.* 1995 Jun;56(6):229-37.

**23. Berlanga 1997**

- Berlanga C, Arechavaleta B, Heinze G, Campillo C, Torres M, Caballero A, Apiquián R, Castelli P. A double-blind comparison of nefazodone and fluoxetine in the treatment of depressed outpatients. *Salud Mental.* 1997;20(3):1-8.

**24. Bersani 1994**

- Bersani G, Rapisarda V, Ciani N, Bertolino A, Sorge G. A double-blind comparative study of sertraline and amitriptyline in outpatients with major depressive episodes. *Human Psychopharmacology: Clinical and Experimental.* 1994;9(1):63-68.

**25. Bielski 2004 (SCT-MD-12)**

- Bielski RJ, Ventura D, Chang CC. A double-blind comparison of escitalopram and venlafaxine extended release in the treatment of major depressive disorder. *J Clin Psychiatry*. 2004 Sep;65(9):1190-6.

**26. Bignamini 1992 (PAR 29060/078)**

- Bignamini A, Rapisarda V. A double-blind multicentre study of paroxetine and amitriptyline in depressed outpatients. Italian Paroxetine Study Group. *Int Clin Psychopharmacol*. 1992 Jun;6 Suppl 4:37-41.
- <https://www.gsk-clinicalstudyregister.com/study/29060/078#rs>

**27. Blacker 1988**

- Blacker R, Shanks NJ, Chapman N, Davey A. The drug treatment of depression in general practice: a comparison of nocte administration of trazodone with mianserin, dothiepin and amitriptyline. *Psychopharmacology*. 1988;95 Suppl:S18-24.

**28. Bosc 1997b (Study 016 - Massana 1999)**

- Massana J, Möller HJ, Burrows GD, Montenegro RM. Reboxetine: a double-blind comparison with fluoxetine in major depressive disorder. *Int Clin Psychopharmacol*. 1999 Mar;14(2):73-80.
- [https://www.iqwig.de/download/Studienbericht\\_zu\\_Studie\\_016.pdf](https://www.iqwig.de/download/Studienbericht_zu_Studie_016.pdf)

**29. Bougerol 1997 (Study 91302 - FDA)**

- Bougerol T, Scotto JC, Patris M, Strut N, Lemming O, Petersen HEH. Citalopram and Fluoxetine in Major Depression. Comparison of Two Clinical Trials in a Psychiatrist Setting and in General Practice. *Clin. Drug Investig*. 1997;14(2):77-89.

**30. Boulenger 2006 (Study 10351)**

- Boulenger JP, Huusom AK, Florea I, Baekdal T, Sarchiapone M. A comparative study of the efficacy of long-term treatment with escitalopram and paroxetine in severely depressed patients. *Curr Med Res Opin*. 2006 Jul;22(7):1331-41.
- [http://www.lundbeck.com/upload/trials/files/pdf/completed/10351\\_Final%20for%20upload\\_28Feb2007\\_CTRS.pdf](http://www.lundbeck.com/upload/trials/files/pdf/completed/10351_Final%20for%20upload_28Feb2007_CTRS.pdf)

**31. Caligiuri 2003**

- Caligiuri MP, Gentili V, Eberson S, Kelsoe J, Rapaport M, Gillin JC. A quantitative neuromotor predictor of antidepressant non-response in patients with major depression. *J Affect Disord*. 2003 Nov;77(2):135-41.

**32. Casabona 2002 (0600B 428)**

- Casabona GM, Silenzi V, Guazzelli M. A randomized, double blind, comparison of venlafaxine ER and paroxetine in outpatients with moderate to severe major depression. *Eur Neuropsychopharm*. 2002;12(Suppl3):208.

**33. Cassano 2002 (29060/421)**

- Cassano GB, Puca F, Scapicchio PL, Trabucchi M; Italian Study Group on Depression in Elderly Patients. Paroxetine and fluoxetine effects on mood and cognitive functions in depressed nondemented elderly patients. *J Clin Psychiatry*. 2002 May;63(5):396-402.
- <https://www.gsk-clinicalstudyregister.com/study/29060/421?search=compound&compound=paroxetine#rs>

**34. Chang 2015**

- Chang HH, Chou CH, Yang YK, Lee IH, Chen PS. Association between ABCB1 Polymorphisms and Antidepressant Treatment Response in Taiwanese Major Depressive Patients. *Clin Psychopharmacol Neurosci*. 2015 Dec 31;13(3):250-5. doi: 10.9758/cpn.2015.13.3.250.

**35. Chouinard 1983a**

- Chouinard G. Bupropion and amitriptyline in the treatment of depressed patients. *J Clin Psychiatry*. 1983 May;44(5 Pt 2):121-9.

**36. Chouinard 1985**

- Chouinard G. A double-blind controlled clinical trial of fluoxetine and amitriptyline in the treatment of outpatients with major depressive disorder. *J Clin Psychiatry*. 1985 Mar;46(3 Pt 2):32-7.

**37. Chouinard 1999 (29060/131)**

- Chouinard G1, Saxena B, Bélanger MC, Ravindran A, Bakish D, Beauclair L, Morris P, Vasavan Nair NP, Manchanda R, Reesal R, Remick R, O'Neill MC. A Canadian multicenter, double-blind study of paroxetine and fluoxetine in major depressive disorder. *J Affect Disord*. 1999 Jul;54(1-2):39-48.
- <https://www.gsk-clinicalstudyregister.com/study/29060/131#rs>

**38. Christiansen 1996**

- Christiansen PE1, Behnke K, Black CH, Ohrström JK, Bork-Rasmussen H, Nilsson J. Paroxetine and amitriptyline in the treatment of depression in general practice. *Acta Psychiatr Scand*. 1996 Mar;93(3):158-63.

**39. CL3-20098-036**

- Unpublished data provided from Servier upon request.

**40. CL3-20098-048**

- [https://www.clinicaltrialsregister.eu/ctr-search/search?query=eudract\\_number:2005-002388-95](https://www.clinicaltrialsregister.eu/ctr-search/search?query=eudract_number:2005-002388-95)

**41. CL3-20098-062**

- <https://www.clinicaltrialsregister.eu/ctr-search/search?query=2008-004642-92>

**42. Clerc 1994**

- Clerc GE, Ruimy P, Verdeau-Pallès J. A double-blind comparison of venlafaxine and fluoxetine in patients hospitalized for major depression and melancholia. The Venlafaxine French Inpatient Study Group. *Int Clin Psychopharmacol*. 1994 Sep;9(3):139-43.

**43. Clerc 2001**

- Clerc G; Milnacipran/Fluvoxamine Study Group. Antidepressant efficacy and tolerability of milnacipran, a dual serotonin and noradrenaline reuptake inhibitor: a comparison with fluvoxamine. *Int Clin Psychopharmacol.* 2001 May;16(3):145-51.

**44. Cohn 1990**

- Cohn CK, Shrivastava R, Mendels J, Cohn JB, Fabre LF, Claghorn JL, Dessain EC, Itil TM, Laitin A. Double-blind, multicenter comparison of sertraline and amitriptyline in elderly depressed patients. *J Clin Psychiatry.* 1990 Dec;51 Suppl B:28-33.

**45. Colonna 2005 (Study 99022)**

- Colonna L, Andersen HF, Reines EH. A randomized, double-blind, 24-week study of escitalopram (10 mg/day) versus citalopram (20 mg/day) in primary care patients with major depressive disorder. *Curr Med Res Opin.* 2005 Oct;21(10):1659-68.
- [http://www.lundbeck.com/upload/trials/files/pdf/completed/99022\\_CTRS\\_final\\_30Dec2005.pdf](http://www.lundbeck.com/upload/trials/files/pdf/completed/99022_CTRS_final_30Dec2005.pdf)

**46. Corruble 2013 (CL3-20098-063)**

- Corruble E, de Bodinat C, Belaïdi C, Goodwin GM; agomelatine study group. Efficacy of agomelatine and escitalopram on depression, subjective sleep and emotional experiences in patients with major depressive disorder: a 24-wk randomized, controlled, double-blind trial. *Int J Neuropsychopharmacol.* 2013 Nov;16(10):2219-34.
- <https://www.clinicaltrialsregister.eu/ctr-search/trial/2006-006540-54/results>

**47. Costaesilva 1998**

- Costa e Silva J. Randomized, double-blind comparison of venlafaxine and fluoxetine in outpatients with major depression. *J Clin Psychiatry.* 1998 Jul;59(7):352-7.

**48. Dalery 2003**

- Dalery J, Honig A. Fluvoxamine versus fluoxetine in major depressive episode: a double-blind randomised comparison. *Hum Psychopharmacol.* 2003 Jul;18(5):379-84.

**49. Debonnel 2000 (Blier2009, iQWIG E-1639)**

- Blier P, Gobbi G, Turcotte JE, de Montigny C, Boucher N, Hébert C, Debonnel G. Mirtazapine and paroxetine in major depression: a comparison of monotherapy versus their combination from treatment initiation. *Eur Neuropsychopharmacol.* 2009 Jul;19(7):457-65.
- [https://www.iqwig.de/download/A05-20C\\_Abschlussbericht\\_1-1\\_Bupropion\\_Mirtazapin\\_und\\_Reboxetin\\_bei\\_Depressionen.pdf](https://www.iqwig.de/download/A05-20C_Abschlussbericht_1-1_Bupropion_Mirtazapin_und_Reboxetin_bei_Depressionen.pdf)

**50. Debus 1988**

- Debus JR, Rush AJ, Himmel C, et al. Fluoxetine versus trazodone in the treatment of outpatients with major depression. *J Clin Psychiatry* 1988;49:422-6.

**51. Demyttenaere 1998**

- Demyttenaere K, Van Ganse E, Gregoire J, Gaens E, Mesters P. Compliance in depressed patients treated with fluoxetine or amitriptyline. Belgian Compliance Study Group. *Int Clin Psychopharmacol.* 1998 Jan;13(1):11-7.

**52. DeRonchi 1998**

- De Ronchi D, Rucci P, Lodi M, Ravaglia G, Forti P, Volterra V. Fluoxetine and amitriptyline in elderly depressed patients. A 10-week, double-blind study on course of neurocognitive adverse events and depressive symptoms. *Arch. Gerontology and Geriatrics*. 1998;26(Suppl 1):125-140.

**53. Deuschle 2003 (NCT01049347)**

- Deuschle M, Hamann B, Meichel C, Krumm B, Lederbogen F, Kniest A, Colla M, Heuser I. Antidepressive treatment with amitriptyline and paroxetine: effects on saliva cortisol concentrations. *J Clin Psychopharmacol*. 2003 Apr;23(2):201-5.
- <https://clinicaltrials.gov/ct2/show/study/NCT01049347>

**54. DeWilde 1983a**

- De Wilde JE, Mertens C, Wakelin JS. Clinical trials of fluvoxamine vs chlorimipramine with single and three times daily dosing. *Br J Clin Pharmacol*. 1983;15 Suppl 3:427S-431S.

**55. DeWilde 1993**

- De Wilde J, Spiers R, Mertens C, Bartholomé F, Schotte G, Leyman S. A double-blind, comparative, multicentre study comparing paroxetine with fluoxetine in depressed patients. *Acta Psychiatr Scand*. 1993 Feb;87(2):141-5.
- <https://www.gsk-clinicalstudyregister.com/files2/1992.pdf>

**56. Dierick 1996**

- Dierick M, Ravizza L, Realini R, Martin A. A double-blind comparison of venlafaxine and fluoxetine for treatment of major depression in outpatients. *Prog Neuropsychopharmacol Biol Psychiatry*. 1996 Jan;20(1):57-71.

**57. DUAG 1990**

- Danish University Antidepressant Group. Paroxetine: a selective serotonin reuptake inhibitor showing better tolerance, but weaker antidepressant effect than clomipramine in a controlled multicenter study. *J Affect Disord*. 1990 Apr;18(4):289-99.

**58. E-1569**

- [https://www.iqwig.de/download/A05-20C\\_Abschlussbericht\\_1-1\\_Bupropion\\_Mirtazapin\\_und\\_Reboxetin\\_bei\\_Depressionen.pdf](https://www.iqwig.de/download/A05-20C_Abschlussbericht_1-1_Bupropion_Mirtazapin_und_Reboxetin_bei_Depressionen.pdf)

**59. Ekselius 1997**

- Ekselius L, von Knorring L. Personality disorder comorbidity with major depression and response to treatment with sertraline or citalopram. *Int Clin Psychopharmacol*. 1998 Sep;13(5):205-11.

**60. Falk 1989**

- Falk WE, Rosenbaum JF, Otto MW, Zusky PM, Weilburg JB, Nixon RA. Fluoxetine versus trazodone in depressed geriatric patients. *J Geriatr Psychiatry Neurol*. 1989 Oct-Dec;2(4):208-14.

**61. Fava 2002**

- Fava M, Hoog SL, Judge RA, Kopp JB, Nilsson ME, Gonzales JS. Acute efficacy of fluoxetine versus sertraline and paroxetine in major depressive disorder including effects of baseline insomnia. *J Clin Psychopharmacol*. 2002 Apr;22(2):137-47.



**62. Fawcett 1989**

- Fawcett J, Zajecka JM, Kravitz HM, Edwards J, Jeffriess H, Scorza E. Fluoxetine versus amitriptyline in adult outpatients with major depression. *Current Therapeutic Research - Clinical and Experimental*. 1989 Jan 1;45(5):821-832.

**63. Feiger 1996**

- Feiger A, Kiev A, Shrivastava RK, Wisselink PG, Wilcox CS. Nefazodone versus sertraline in outpatients with major depression: focus on efficacy, tolerability, and effects on sexual function and satisfaction. *J Clin Psychiatry*. 1996;57 Suppl 2:53-62.

**64. Feighner 1991**

- Feighner JP, Gardner EA, Johnston JA, Batey SR, Khayrallah MA, Ascher JA, Lineberry CG. Double-blind comparison of bupropion and fluoxetine in depressed outpatients. *J Clin Psychiatry*. 1991 Aug;52(8):329-35.

**65. Fudge 1990**

- Fudge JL, Perry PJ, Garvey MJ, Kelly MW. A comparison of the effect of fluoxetine and trazodone on the cognitive functioning of depressed outpatients. *J Affect Disord*. 1990 Apr;18(4):275-80.

**66. Gagiano 1993**

- Gagiano C. A double-blind comparison of paroxetine and fluoxetine in patients with major depression. *Br J Clin Res*. 1993;4:145-152.
- <https://www.gsk-clinicalstudyregister.com/files2/2783.pdf>

**67. Gentil 2000**

- Gentil V, Kerr-Correa F, Moreno R, D'Arrigo Busnello E, De Campos JA, Juruena MF, Lafer B, Moreno DH, De Cassia Rodrigues RL, Tiosso A, Benedictis E. Double-blind comparison of venlafaxine and amitriptyline in outpatients with major depression with or without melancholia. *J Psychopharmacol*. 2000 Mar;14(1):61-6.

**68. Geretsegger 1995 (MY-060/BRL-029060/1)**

- Geretsegger C, Stuppaeck CH, Mair M, Platz T, Fartacek R, Heim M. Multicenter double blind study of paroxetine and amitriptyline in elderly depressed inpatients. *Psychopharmacology (Berl)*. 1995 Jun;119(3):277-81.
- <https://www.gsk-clinicalstudyregister.com/study/29060/073?search=study&#rs>

**69. Gillin 1997**

- Gillin JC, Rapaport M, Erman MK, Winokur A, Albala BJ. A comparison of nefazodone and fluoxetine on mood and on objective, subjective, and clinician-rated measures of sleep in depressed patients: a double-blind, 8-week clinical trial. *J Clin Psychiatry*. 1997 May;58(5):185-92.

**70. Ginestet 1989**

- Ginestet D. Fluoxetine in endogenous depression and melancholia versus clomipramine. *Int Clin Psychopharmacol*. 1989 Jan;4 Suppl 1:37-40.

**71. Guelfi 1998**

- Guelfi JD, Anseau M, Corruble E, Samuelian JC, Tonelli I, Tournoux A, Plétan Y. A double-blind comparison of the efficacy and safety of milnacipran and fluoxetine in depressed inpatients. *Int Clin Psychopharmacol.* 1998 May;13(3):121-8.

**72. Guillibert 1989 (PAR 290 MDF 29060 1727 M)**

- Guillibert E, Pelicier Y, Archambault JC, Chabannes JP, Clerc G, Desvilles M, Guibert M, Pagot R, Poisat JL, Thobie Y. A double-blind, multicentre study of paroxetine versus clomipramine in depressed elderly patients. *Acta Psychiatr Scand Suppl.* 1989;350:132-4.
- <https://www.gsk-clinicalstudyregister.com/study/29060/290?search=study&#rs>

**73. Hackett 1998**

- Hackett D, Salinas E, Desmet A. Efficacy and safety of venlafaxine vs. fluvoxamine in outpatients with major depression. *Eur Neuropsychopharmacol.* 1998;8(Supp2):S209

**74. Hale 2010 (CL3-20098-045)**

- Hale A, Corral RM, Mencacci C, Ruiz JS, Severo CA, Gentil V. Superior antidepressant efficacy results of agomelatine versus fluoxetine in severe MDD patients: a randomized, double-blind study. *Int Clin Psychopharmacol.* 2010 Nov;25(6):305-14.
- <https://www.tga.gov.au/sites/default/files/auspar-valdoxan.pdf>

**75. Hao 2014**

- Hao X, Yang F, Kuang H, Shi J, Du B, Zhang K, Zhang H. Duloxetine hydrochloride enteric tablets in the treatment of major depressive disorder: a multicentre, randomised, double-blind and positive drug parallel controlled clinical trial. *Chinese Journal of new Drugs.* 2014;23:2767-2780.

**76. Harris 1991**

- Harris B, Szulecka TK, Anstee JA. Fluvoxamine versus amitriptyline in depressed hospital outpatients: A multicentre double-blind comparative trial. *Br J Clin Res.* 1991;2:89-99.

**77. Heller 2009 (NCT00909155)**

- Heller AS, Johnstone T, Shackman AJ, Light SN, Peterson MJ, Kolden GG, Kalin NH, Davidson RJ. Reduced capacity to sustain positive emotion in major depression reflects diminished maintenance of fronto-striatal brain activation. *Proc Natl Acad Sci U S A.* 2009 Dec 29;106(52):22445-50.
- <https://clinicaltrials.gov/ct2/show/NCT00909155>

**78. Hicks 2002**

- Hicks JA, Argyropoulos SV, Rich AS, Nash JR, Bell CJ, Edwards C, Nutt DJ, Wilson SJ. Randomised controlled study of sleep after nefazodone or paroxetine treatment in out-patients with depression. *Br J Psychiatry.* 2002 Jun;180:528-35.

**79. Hong 2003 (22521)**

- Hong CJ, Hu WH, Chen CC, Hsiao CC, Tsai SJ, Ruwe FJ. A double-blind, randomized, group-comparative study of the tolerability and efficacy of 6 weeks' treatment with mirtazapine or fluoxetine in depressed Chinese patients. *J Clin Psychiatry.* 2003 Aug;64(8):921-6.

**80. Hosseini 2015 (IRCT201203048513N1)**

- Hosseini F, Amini F, Yassini Ardekani SM, Shariat N, Nadi M. Double-Blind Randomized Clinical Trial of the Efficacy of Venlafaxine Versus Citalopram in the Treatment of the Acute Phase of Major Depressive Disorder. *Iran J Psychiatry Behav Sci.* 2015 Jun;9(2):e1041.
- <http://www.irct.ir/searchresult.php?keyword=&id=8513&field=&number=1&prt=43&total=10&m=1>

**81. Hsu 2011**

- Hsu JW, Su TP, Huang CY, Chen YS, Chou YH. Faster onset of antidepressant effects of citalopram compared with sertraline in drug-naïve first-episode major depressive disorder in a Chinese population: a 6-week double-blind, randomized comparative study. *J Clin Psychopharmacol.* 2011 Oct;31(5):577-81.

**82. Hu 2009**

- Hu M, Li L, Lu X, Xun G, Chen J. Escitalopram vs citalopram for depression: a randomized, double-blind, double-dummy, multicentre, parallel controlled study. *Central South Pharmacy.* 2009; 8(1):1-4.

**83. Hutchinson 1992**

- Hutchinson DR, Tong S, Moon CA, Vince M, Clarke A. Paroxetine in the treatment of elderly depressed patients in general practice: a double-blind comparison with amitriptyline. *Int Clin Psychopharmacol.* 1992 Jun;6(Suppl 4):43-51.

**84. Jiang 2009**

- Jiang X, Ren K. A comparative study on escitalopram and citalopram hydrobromide in the treatment of depression. *Journal of Qiqihar Medical College,* 2009; 30(1):1-2.

**85. Judd 1993**

- Judd FK, Moore K, Norman TR, Burrows GD, Gupta RK, Parker G. A multicentre double blind trial of fluoxetine versus amitriptyline in the treatment of depressive illness. *Aust N Z J Psychiatry.* 1993 Mar;27(1):49-55.

**86. Kamijima 2013 (japicCTI-090733)**

- Kamijima K, Hashimoto S, Nagayoshi E, Koyama T. Double-blind, comparative study of milnacipran and paroxetine in Japanese patients with major depression. *Neuropsychiatr Dis Treat.* 2013;9:555-65.

**87. Kasper 2005b**

- Kasper S, Olivieri L, Di Loreto G, Dionisio P. A comparative, randomised, double-blind study of trazodone prolonged-release and paroxetine in the treatment of patients with major depressive disorder. *Curr Med Res Opin.* 2005 Aug;21(8):1139-46.

**88. Keegan 1991**

- Keegan D, Bowen RC, Blackshaw S, Saleh S, Dayal N, Remillard F, Shrikhande S, Cebrian Perez S, Boulton A. A comparison of fluoxetine and amitriptyline in the treatment of major depression. *Int Clin Psychopharmacol.* 1991 Summer;6(2):117-24.

**89. Keller 2007 (NCT00046020)**

- Keller MB, Trivedi MH, Thase ME, Shelton RC, Kornstein SG, Nemeroff CB, Friedman ES, Gelenberg AJ, Kocsis JH, Dunner DL, Hirschfeld RM, Rothschild AJ, Ferguson JM, Schatzberg AF, Zajecka JM, Pedersen RD, Yan B, Ahmed S, Musgnung J, Ninan PT. The Prevention of Recurrent Episodes of Depression with Venlafaxine for Two Years (PREVENT) Study: Outcomes from the 2-year and combined maintenance phases. *J Clin Psychiatry*. 2007 Aug;68(8):1246-56.
- <https://clinicaltrials.gov/ct2/show/NCT00046020>

**90. Kennedy 2005 (SCT-MD-16)**

- Kennedy SH, Anderson HF, Lam RW. A pooled analysis of selective serotonin reuptake inhibitors and venlafaxine. Poster presented at the American Psychiatric Association, May 2005.

**91. Kerkhofs 1990**

- Kerkhofs M, Rielaeert C, de Maertelaer V, Linkowski P, Czarka M, Mendlewicz J. Fluoxetine in major depression: efficacy, safety and effects on sleep polygraphic variables. *Int Clin Psychopharmacol*. 1990 Oct;5(4):253-60.

**92. Khan 2007 (SCT-MD-23, NCT00108979)**

- <https://clinicaltrials.gov/ct2/show/NCT00108979>

**93. Kiev 1997**

- Kiev A, Feiger A. A double-blind comparison of fluvoxamine and paroxetine in the treatment of depressed outpatients. *J Clin Psychiatry*. 1997 Apr;58(4):146-52.

**94. Kuhs 1989 (MDUK\_29060\_III\_85\_043)**

- Kuhs H, Rudolf GA. A double-blind study of the comparative antidepressant effect of paroxetine and amitriptyline. *Acta Psychiatr Scand Suppl*. 1989;350:145-6.
- <https://www.gsk-clinicalstudyregister.com/study/29060/043?search=compound&compound=paroxetine#rs>

**95. Laakman 1988**

- Laakmann G, Blaschke D, Engel R, Schwarz A. Fluoxetine vs amitriptyline in the treatment of depressed out-patients. *Br J Psychiatry Suppl*. 1988 Sep;(3):64-8.

**96. Lalit 2004**

- Lalit V, Appaya PM, Hegde RP, Mital AK, Mittal S, Nagpal R, Palaniappan V, Ramsbramaniam C, Rao GP, Roy K, Trivedi JK, Vankar GK, Karan RS, Shah S, Patel RB. Escitalopram Versus Citalopram and Sertraline: A Double-Blind Controlled, Multi-centric Trial in Indian Patients with Unipolar Major Depression. *Indian J Psychiatry*. 2004 Oct-Dec; 46(4): 333–341.

**97. Lapierre 1980**

- Lapierre YD, Sussman P, Ghadirian A. Differential antidepressant properties of trazodone and amitriptyline in agitated and retarded depression. *Current Therapeutic Research*. 1980; 28:845-856.

**98. Lee 2007 (F1J-AA-HMCV, NCT00489775)**

- Lee P, Shu L, Xu X, Wang CY, Lee MS, Liu CY, Hong JP, Ruschel S, Raskin J, Colman SA, Harrison GA. Once-daily duloxetine 60 mg in the treatment of major depressive disorder: multicenter, double-blind, randomized, paroxetine-controlled, non-inferiority trial in China, Korea, Taiwan and Brazil. *Psychiatry Clin Neurosci.* 2007 Jun;61(3):295-307.
- <https://clinicaltrials.gov/ct2/show/NCT00489775>

**99. Leinonen 1997**

- Leinonen E, Lepola U, Koponen H, Mehtonen OP, Rimon R. Long-term efficacy and safety of milnacipran compared to clomipramine in patients with major depression. *Acta Psychiatr Scand.* 1997 Dec;96(6):497-504.

**100. Leinonen 1999 (Agren1995)**

- Leinonen E, Skarstein J, Behnke K, Agren H, Helsdingen JT. Efficacy and tolerability of mirtazapine versus citalopram: a double-blind, randomized study in patients with major depressive disorder. Nordic Antidepressant Study Group. *Int Clin Psychopharmacol.* 1999 Nov;14(6):329-37.

**101. Lemoine 2007 (CL3-20098-035)**

- Lemoine P, Guilleminault C, Alvarez E. Improvement in subjective sleep in major depressive disorder with a novel antidepressant, agomelatine: randomized, double-blind comparison with venlafaxine. *J Clin Psychiatry.* 2007 Nov;68(11):1723-32.
- Servier. Study CL3-20098-035. Efficacy of agomelatine (25 mg with potential adjustment at 50 mg) given orally versus venlafaxine on subjective sleep evaluation of patients with Major Depressive Disorder. A randomised double-blind parallel groups study. 6-week treatment plus optional continuation for 18 weeks. Available from Servier. 2005.

**102. Lepine 2000**

- Lépine JP, Goger J, Blashko C, Probst C, Moles MF, Kosolowski J, Scharfetter B, Lane RM. A double-blind study of the efficacy and safety of sertraline and clomipramine in outpatients with severe major depression. *Int Clin Psychopharmacol.* 2000 Sep;15(5):263-71.

**103. Li 2006**

- Li J, Shen W, Liu Y, Xu L, Liu S, Kuang W. The Effectiveness and Safety of Escitalopram in the Treatment of Depression: A Randomized Double-blind Active-drug Controlled Trial. *Chin J Evid-based Med.* 2006; 6 (8):1-5.

**104. Li 2010**

- Li X, Tao F, Wang X, Li Ji. Clinical Research on Escitalopram Oxalate Tablets in Treatment of Depression. *Pharmaceutical and Clinical Research.* 2010; 18(1):1-3.

**105. Lv 2013**

- Lv Z, Zhang Y, Qi S. A randomized double-blind study of escitalopram and citalopram in treating major depression. *J Clin Psychiatry.* 2013;23(1):1-3.

**106. Manna 1989**

- Manna V, Martucci N, Agnoli A. Double-blind controlled study on the clinical efficacy and safety of fluoxetine vs clomipramine in the treatment of major depressive disorders. *Int Clin Psychopharmacol.* 1989 Jan;4 Suppl 1:81-8.

**107. Mao 2008**

- Mao P, Tang Y, Jiang F, Shu L, Gu X, Li M, Qian M, Ma C, Mitchell PB, Cai Z. Escitalopram in major depressive disorder: a multicenter, randomized, double-blind, fixed-dose, parallel trial in a Chinese population. *Depression and Anxiety.* 2008; 25(1): 46–54.

**108. Marchesi 1998**

- Marchesi C, Ceccherininelli A, Rossi A, Maggini C. Is Anxious-Agitated Major Depression Responsive to Fluoxetine? A Double-Blind Comparison with Amitriptyline. *Pharmacopsychiatry.* 1998;31(6):216-21.

**109. McPartlin 1998**

- McPartlin GM, Reynolds A, Anderson C, Casoy J. A comparison of once daily venlafaxine xr and paroxetine in depressed outpatients treated in general practice. *Primary Care Psychiatry.* 1998;4:127-32.

**110. MDF/29060/III/070/88/MC**

- <https://www.gsk-clinicalstudyregister.com/study/29060/070#rs>

**111. Mehtonen 2000**

- Mehtonen OP, Sogaard J, Roponen P, Behnke K. Randomized, Double-Blind Comparison of Venlafaxine and Sertraline in Outpatients With Major Depressive Disorder. *The Journal of Clinical Psychiatry.* 2000;61(2):95-100.

**112. Miura 2000**

- Miura S, Koyama T, Asai M, Endo S, Kamijima K, Ushijima S, Murasaki M, Kariya T, Koshino Y, Nakajima T, Nishimura K, Kudo Y, Saito M, Watanabe M, Tashiro N, Nakane Y. Clinical evaluation of paroxetine HCl, a selective serotonin reuptake inhibitor, in the treatment of depression or depressive episodes: Double-blind, parallel group study with amitriptyline HCl. *Yakuri To Chiro (Jpn Pharmacol Ther).* 2000; 28 Supplement: 187-210. (in Japanese)

**113. Moller1993 (Stuppaeck1994, MY-059.073/29060/1)**

- Möller HJ, Berzewski H, Eckmann F, Gonzalves N, Kissling W, Knorr W, Ressler P, Rudolf GA, Steinmeyer EM, Magyar I. Double-blind multicenter study of paroxetine and amitriptyline in depressed inpatients. *Pharmacopsychiatry.* 1993 May;26(3):75-8.
- <https://www.gsk-clinicalstudyregister.com/study/29060/073?search=study&#rs>

**114. Moller 1998 (Hegerl 1997)**

- Möller HJ, Gallinat J, Hegerl U, Arató M, Janka Z, Pflug B, Bauer H. Double-Blind, Multicenter Comparative Study of Sertraline and Amitriptyline in Hospitalized Patients with Major Depression. *Pharmacopsychiatry.* 1998;31(5):170-7.

**115. Moller 2000**

- Möller HJ, Glaser K, Leverkus F, Göbel C. Double-blind, multicenter comparative study of sertraline versus amitriptyline in outpatients with major depression. *Pharmacopsychiatry*. 2000 Nov;33(6):206-12.

**116. Montgomery 2004a (Study 99067)**

- Montgomery SA, Huusom AKT, Bothmer J. A Randomised Study Comparing Escitalopram with Venlafaxine XR in Primary Care Patients with Major Depressive Disorder. *Neuropsychobiology*. 2004;50(1):57-64.

**117. Montgomery 2004b (CL3-20098-030)**

- Montgomery SA, Kennedy SH, Burrows GD, Lejoyeux M, Hindmarch I. Absence of discontinuation symptoms with agomelatine and occurrence of discontinuation symptoms with paroxetine: A randomized, double-blind, placebo-controlled discontinuation study. *International Clinical Psychopharmacology*. 2004;19(5):271-80.

**118. Moon 1994**

- Moon CAL, Jago W, Wood K, Doogan DP. A double-blind comparison of sertraline and clomipramine in the treatment of major depressive disorder and associated anxiety in general practice. *Journal of Psychopharmacology*. 1994;8(3):171-6.

**119. Moore 2005**

- Moore N, Verdoux H, Fantino B. Prospective, multicentre, randomized, double-blind study of the efficacy of escitalopram versus citalopram in outpatient treatment of major depressive disorder. *Int Clin Psychopharmacol*. 2005 May;20(3):131-7.

**120. Munizza 2006**

- Munizza C, Olivieri L, Di Loreto G, Dionisio P. A comparative, randomized, double-blind study of trazodone prolonged-release and sertraline in the treatment of major depressive disorder. *Curr Med Res Opin*. 2006 Sep;22(9):1703-13.

**121. Murasaki 1998**

- Murasaki M, Mori A, Miura S et al. Clinical evaluation of SME3110 (fluvoxamine maleate) in the treatment of depression and depressive state: A double-blind, comparative study with amitriptyline. *Rinsho-Iyaku (Journal of Clinical Therapeutics & Medicines)* 1998; 14(5): 951-980. (in Japanese)

**122. Murasaki 2010a (iQWIG22532, Schoemaker 2002)**

- Murasaki M, Schoemaker JH, Miyake K, Gailledreau J, Heukels AJ, Fennema HP, Sitsen JMA. Comparison of efficacy and safety of mirtazapine versus fluvoxamine in Japanese and Caucasian patients with major depressive disorder. *Rinsho-Seishin-Yakuri (Japanese Journal of Clinical Psychopharmacology)* 2010 13(2): 339-355. (in Japanese)

**123. Murasaki 2010b (iQWIG9902, Schoemaker 2002)**

- Murasaki M, Schoemaker JH, Miyake K, Gailledreau J, Heukels AJ, Fennema HP, Sitsen JMA. Comparison of efficacy and safety of mirtazapine versus fluvoxamine in Japanese and Caucasian patients with major depressive disorder. *Rinsho-Seishin-Yakuri (Japanese Journal of Clinical Psychopharmacology)* 2010 13(2): 339-355. (in Japanese)

**124. Nemeroff 1995**

- Nemeroff CB, Ninan P, Ballenger J, Lydiard RB, Feighner J, Patterson WM, Greist JH. Double-blind multicenter comparison of fluvoxamine versus sertraline in the treatment of depressed outpatients. *Depression*. 1995;3(4):163-69.

**125. Newhouse 2000**

- Newhouse PA, Krishnan KR, Doraiswamy PM, Richter EM, Batzar ED, Clary CM. A double-blind comparison of sertraline and fluoxetine in depressed elderly patients. *J Clin Psychiatry*. 2000;61(8):559-68.

**126. Noguera 1991**

- Noguera R, Altuna R. Fluoxetine vs. clomipramine in depressed patients: a controlled multicentre trial. *J Affect Disord*. 1991;22(3):119-24.

**127. Ontiveros 1994 (MY-0144/BRL 29060/1/CPMS-135, PAR135)**

- Ontiveros A, Garcia-Barriga C. A double-blind, comparative study of paroxetine and fluoxetine in out-patients with depression. *Brit J Clin Research*. 1997; 8:23-32.
- <https://www.gsk-clinicalstudyregister.com/study/29060/135#rs>

**128. Ontiveros Sanchez 1998**

- Ontiveros Sánchez JA, Brandi F, Brunner E. Estudio doble-ciego sobre fluoxetina vs amitriptilina en los síntomas depresivos y de ansiedad, y calidad de vida de los adultos con depresión mayor. *Salud Mental*. 1998;21(1):58-63.

**129. Ottevanger 1995**

- Ottevanger EA. Fluvoxamine and clomipramine in depressed hospitalised patients: Results from a randomised, double-blind study. *L Encéphale*. 1995;21(4):317-21.

**130. Ou 2010**

- Ou JJ, Xun GL, Wu RR, Li LH, Fang MS, Zhang HG, Xie SP, Shi JG, Du B, Yuan XQ, Zhao JP. Efficacy and safety of escitalopram versus citalopram in major depressive disorder: a 6-week, multicenter, randomized, double-blind, flexible-dose study. *Psychopharmacology*. 2011; 213(2): 639–46.

**131. PAR 29060.308 (HP/81/74A)**

- <https://www.gsk-clinicalstudyregister.com/study/29060/308#rs>

**132. PAR 29060.310 (HP 81/85A)**

- <https://www.gsk-clinicalstudyregister.com/study/29060/310#rs>

**133. PAR 29060.314 (HP 82/134)**

- <https://www.gsk-clinicalstudyregister.com/study/29060/314?search=study&#rs>



**134. PAR 29060.316 (HP/82/47A)**

- <https://www.gsk-clinicalstudyregister.com/study/29060/316#rs>

**135. PAR 29060.318 (HP/82/64A)**

- <https://www.gsk-clinicalstudyregister.com/study/29060/318#rs>

**136. PAR 29060/281**

- <https://www.gsk-clinicalstudyregister.com/study/29060/281#rs>

**137. PAR MDUK 032**

- <https://www.gsk-clinicalstudyregister.com/study/29060/032#rs>

**138. Patris 1996 (Study 91301 - FDA)**

- Patris M, Bouchard JM, Bougerol T, Charbonnier JF, Chevalier JF, Clerc G, Cyran C, Van Amerongen P, Lemming O, Høpfner-Peterson HE. Citalopram versus fluoxetine: A double-blind, controlled, multicentre, phase III trial in patients with unipolar major depression treated in general practice. *International Clinical Psychopharmacology*. 1996;11(2):129-36.

**139. Pélicier 1993 (PAR MDED/29060/III/86/1728M291)**

- Pélicier Y, Schaeffer P. Multicenter double-blind study comparing the efficacy and tolerance of paroxetine and clomipramine in reactive depression in the elderly patient. *L Encéphale*. 1993;19(3):257-61.
- <https://www.gsk-clinicalstudyregister.com/study/29060/291#rs>

**140. Perahia 2008a (HMBU, NCT00071695)**

- Perahia DGS, Pritchett Y, Kajdasz D, Bauer M, Jain R, Russell JM, Walker DJ, Spencer KA, Froud DM, Raskin J, Thase ME. A randomized, double-blind comparison of duloxetine and venlafaxine in the treatment of patients with major depressive disorder. *Journal of Psychiatric Research*. 2008;42(1):22-34.
- <https://www.clinicaltrials.gov/ct2/show/NCT00071695>

**141. Perahia 2008b (HMCQ, NCT00067912)**

- Perahia DGS, Pritchett Y, Kajdasz D, Bauer M, Jain R, Russell JM, Walker DJ, Spencer KA, Froud DM, Raskin J, Thase ME. A randomized, double-blind comparison of duloxetine and venlafaxine in the treatment of patients with major depressive disorder. *Journal of Psychiatric Research*. 2008;42(1):22-34.
- <https://clinicaltrials.gov/ct2/show/NCT00067912>

**142. Preskorn 1991**

- Preskorn S, Silkey B, Beber J, Dorey C. Antidepressant Response and Plasma Concentrations of Fluoxetine. *Annals of Clinical Psychiatry*. 1991;3(2):147-151.

**143. Quera-Salva 2010 (CL3-20098-056)**

- Quera-Salva MA, Hajak G, Philip P, Montplaisir J, Keufer-Le Gall S, Laredo J, Guilleminault C. Comparison of agomelatine and escitalopram on nighttime sleep and daytime condition and efficacy in major depressive disorder patients. *International Clin psychopharmacology*. 2011;26(5):252-62.
- <https://www.clinicaltrialsregister.eu/ctr-search/trial/2006-004716-48/results>

**144. Rapaport 1996**

- Rapaport M, Coccaro EF, Sheline YI, Perse T, Holland P, Fabre L, Bradford D. A Comparison of Fluvoxamine and Fluoxetine in the Treatment of Major Depression. *Journal of Clinical Psychopharmacology*. 1996;16(5):373-8.

**145. Ravindran 1997 (MY-1055/BRL-029060/1/CPMS-245 PAR 245)**

- Ravindran AV, Judge R, Hunter BN, Bray J, Morten NH. A double-blind, multicenter study in primary care comparing paroxetine and clomipramine in subjects with depression and associated anxiety. *J. Clin. Psychiatry*. 1997; 58:112-118.
- <https://www.gsk-clinicalstudyregister.com/study/29060/245#rs>

**146. Remick 1994**

- Remick RA, Reesal R, Oakander M, Allen J, Claman J, Ramirez CE, Perry K, Keller FD. Comparison of fluvoxamine and amitriptyline in depressed outpatients. *Current Therapeutic Research*. 1994;55(3):243-250.

**147. Ropert 1989**

- Ropert R. Fluoxetine versus clomipramine in major depressive disorders. *Int Clin Psychopharmacol*. 1989 Jan;4 Suppl 1:89-95.

**148. Rossini 2005**

- Rossini D, Serretti A, Franchini L, Mandelli L, Smeraldi E, De Ronchi D, Zanardi R. Sertraline Versus Fluvoxamine in the Treatment of Elderly Patients With Major Depression *Journal of Clinical Psychopharmacology*. 2005;25(5):471-5.

**149. Rouillon 1991 (Limosin 2006, 029060/1/CPMS 069 1991)**

- Rouillon F. A double-blind, multicentre study comparing increasing doses of paroxetine (20-50mg) and clomipramine (50-150mg) in elderly patients with major depression. *World Congress of Biological Psychiatry 1991:28* (poster presentation)
- Limosin F, Samuelian JC, Rouillon F. Multicenter Double-Blind Study of the Efficacy of Paroxetine versus Clomipramine in Elderly Patients with Major Depression. *Journal of Aging and Pharmacotherapy*. 2006;13(2):7-19.
- <https://www.gsk-clinicalstudyregister.com/study/29060/069#rs>

**150. Samuelian 1998**

- Samuelian JC, Hackett D. A Randomized, Double-Blind, Parallel-Group Comparison of Venlafaxine and Clomipramine in Outpatients With Major Depression. *J Psychopharmacol*. 1998;12 (3):273-278.

**151. Sauer 2003**

- Sauer H, Huppertz-Helmhold S, Dierkes W. Efficacy and safety of venlafaxine ER vs. amitriptyline ER in patients with major depression of moderate severity. *Pharmacopsychiatry*. 2003 Sep;36(5):169-75.

**152. Schatzberg 2002 (003-901)**

- Schatzberg AF, Kremer C, Rodrigues HE, Murphy GM Jr: Mirtazapine vs. Paroxetine Study Group. Double-blind, randomized comparison of mirtazapine and paroxetine in elderly depressed patients. *Am J Geriatr Psychiatry*. 2002 Sep-Oct;10(5):541-50.

**153. Schoene 1993 (Geretsegger 1994, MY1021/BRC)**

- Schöne W, Ludwig M. A double-blind study of paroxetine compared with fluoxetine in geriatric patients with major depression. *J Clin Psychopharmacol*. 1993 Dec;13(6 Suppl 2):34S-39S.

**154. Schwartz 2002 (iQWIG)**

- [https://www.iqwig.de/download/Studie\\_Schwartz\\_et\\_al\\_Poster.pdf](https://www.iqwig.de/download/Studie_Schwartz_et_al_Poster.pdf)

**155. SCT-MD-09**

- Forest Research Institute. Double-blind comparison of the effects of lu 26-054 (escitalopram) and fluoxetine on sleep in depressed patients (SCT-MD-09).

**156. Sechter 1999**

- Sechter D, Troy S, Paternetti S, Boyer P. A double-blind comparison of sertraline and fluoxetine in the treatment of major depressive episode in outpatients. *Eur Psychiatry*. 1999 Mar;14(1):41-8.

**157. Sechter 2004**

- Sechter D, Vandel P, Weiller E, Pezous N, Cabanac F, Tournoux A; study co-coordinators. A comparative study of milnacipran and paroxetine in outpatients with major depression. *J Affect Disord*. 2004 Dec;83(2-3):233-6.

**158. SER-CHN-1**

- <https://www.gsk-clinicalstudyregister.com/study/29060/403#rs>

**159. Shelton 2006 (NCT00179283)**

- Shipley JE, Kupfer DJ, Spiker DG, Shaw DH, Coble PA, Neil JF, Cofsky J. Neuropsychological assessment and EEG sleep in affective disorders. *Biol Psychiatry*. 1981 Oct;16(10):907-18.
- <https://clinicaltrials.gov/ct2/show/NCT00179283>

**160. Shu 2014 (CL3-20098-052, ChiCTR-TRC-11001668)**

- Shu L, Sulaiman AH, Huang YS, Fones Soon Leng C, Crutel VS, Kim YS. Comparable efficacy and safety of 8 weeks treatment with agomelatine 25-50mg or fluoxetine 20-40mg in Asian out-patients with major depressive disorder. *Asian J Psychiatr*. 2014 Apr;8:26-32.

**161. Sir 2005**

- Sir A, D'Souza RF, Uguz S, George T, Vahip S, Hopwood M, Martin AJ, Lam W, Burt T. Randomized trial of sertraline versus venlafaxine XR in major depression: efficacy and discontinuation symptoms. *J Clin Psychiatry*. 2005 Oct;66(10):1312-20.

**162. Smeraldi 1998**

- Smeraldi E, Aguglia A, Cattaneo M, Cerati C, Covelli C, Del Zompo M, Faravelli C, Gerrari G, Ghirlanda A, Guazzelli G, Mansi M, Ravizza L. Double-blind, randomized study of venlafaxine, clomipramine, and trazodone in geriatric patients with major depression. *Eur Neuropsychopharm*. 1997;7(2):S170.

**163. Staner 1995 (063)**

- <https://www.gsk-clinicalstudyregister.com/study/29060/063?#rs>

**164. Studie032 (M2020/0032)**

- [https://www.iqwig.de/download/Studie\\_032.pdf](https://www.iqwig.de/download/Studie_032.pdf)

**165. Study 043**

- [https://www.iqwig.de/download/Studie\\_043.pdf](https://www.iqwig.de/download/Studie_043.pdf)

**166. Szegedi 2006**

- Benkert O, Szegedi A, Philipp M, Kohnen R, Heinrich C, Heukels A, van der Vegte-Senden M, Baker RA, Simmons JH, Schutte AJ. Mirtazapine orally disintegrating tablets versus venlafaxine extended release: a double-blind, randomized multicenter trial comparing the onset of antidepressant response in patients with major depressive disorder. *J Clin Psychopharmacol.* 2006 Feb;26(1):75-8.

**167. Thase 2006**

- Thase ME, Clayton AH, Haight BR, Thompson AH, Modell JG, Johnston JA. A double-blind comparison between bupropion XL and venlafaxine XR: sexual functioning, antidepressant efficacy, and tolerability. *J Clin Psychopharmacol.* 2006 Oct;26(5):482-8.

**168. Tignol 1993 (29060/087)**

- Tignol J. A double-blind, randomized, fluoxetine-controlled, multicenter study of paroxetine in the treatment of depression. *J Clin Psychopharmacol.* 1993 Dec;13(6 Suppl 2):18S-22S.
- <https://www.gsk-clinicalstudyregister.com/study/29060/087>

**169. Timmerman 1993 (Study 89422 – FDA, Haffmans 1996)**

- Haffmans PM, Timmerman L, Hoogduin CA. Efficacy and tolerability of citalopram in comparison with fluvoxamine in depressed outpatients: a double-blind, multicentre study. The LUCIFER Group. *Int Clin Psychopharmacol.* 1996 Sep;11(3):157-64.

**170. Tsutsui 2000**

- Tsutsui S, Okuse T, Sasaki D et al. Clinical evaluation of paroxetine HCl, a selective serotonin reuptake inhibitor, in the treatment of depression or depressive episodes: Double-blind, parallel group study with trazodone HCl. *Yakuri-To-Chiryō (Jpn Pharmacol Ther)* 2000; Supplement: 161-185.

**171. Tylee 1997**

- Tylee A, Beaumont G, Bowden MW, Reynolds A. A double-blind, randomized, 12-week comparison study of the safety and efficacy of venlafaxine and fluoxetine in moderate to severe major depression in general practice. *Primary Care Psychiatry.* 1997;3:51-58.

**172. Tzanakaki 2000**

- Tzanakaki M, Guazzelli M, Nimatoudis I, Zissis NP, Smeraldi E, Rizzo F. Increased remission rates with venlafaxine compared with fluoxetine in hospitalized patients with major depression and melancholia. *Int Clin Psychopharmacol.* 2000 Jan;15(1):29-34.

**173. Upward 1988**

- Upward JW, Edwards JG, Goldie A, Waller DG. Comparative effects of fluoxetine and amitriptyline on cardiac function. *Br J Clin Pharmacol.* 1988 Oct; 26(4): 399–402.

**174. Van Moffaert 1995a**

- Van Moffaert M, Bartholome F, Cosyns P, De Nayer AR, Mertens C. A controlled comparison of sertraline and fluoxetine in acute and continuation treatment of major depression. *Human Psychopharm.* 1995;10(5):393–405.

**175. Van Moffaert 1995b**

- Van Moffaert M, de Wilde J, Vereecken A, Dierick M, Evrard JL, Wilmotte J, Mendlewicz J. Mirtazapine is more effective than trazodone: a double-blind controlled study in hospitalized patients with major depression. *Int Clin Psychopharmacol.* 1995 Mar;10(1):3-9.

**176. Ventura 2007 (SCT-MD-18)**

- Ventura D, Armstrong EP, Skrepnek GH, Haim Erder M. Escitalopram versus sertraline in the treatment of major depressive disorder: A randomized clinical trial *Current Medical Research and Opinion.* 2007;23(2):245-50.

**177. Versiani 1999**

- Versiani M, Ontiveros JA, Mazzotti G, Ospina J, Dávila J, Mata S, Pacheco A, Plewes JM, Tamura RN, Palacios M. Fluoxetine versus amitriptyline in the treatment of major depression with associated anxiety (anxious depression): A double-blind comparison. *International Clinical Psychopharmacology.* 1993;8(3):143-9.

**178. Versiani 2005**

- Versiani M, Moreno R, Ramakers-van Moorsel CJ, Schutte AJ; Comparative Efficacy Antidepressants Study Group. Comparison of the effects of mirtazapine and fluoxetine in severely depressed patients. *CNS Drugs.* 2005;19(2):137-46.

**179. Wade 2003 (E-1721)**

- Wade A, Crawford GM, Angus M, Wilson R, Hamilton L. A randomized, double-blind, 24-week study comparing the efficacy and tolerability of mirtazapine and paroxetine in depressed patients in primary care. *Int Clin Psychopharmacol.* 2003 May;18(3):133-41.

**180. Wade 2007 (Study 10990)**

- Wade A, Gembert K, Florea I. A comparative study of the efficacy of acute and continuation treatment with escitalopram versus duloxetine in patients with major depressive disorder. *Curr Med Res Opin.* 2007 Jul;23(7):1605-14.

**181. Wang 2015 (NCT01571453, KCT0000432, 13926A)**

- Wang G, Gislum M, Filippov G, Montgomery S. Comparison of vortioxetine versus venlafaxine XR in adults in Asia with major depressive disorder: a randomized, double-blind study. *Curr Med Res Opin.* 2015 Apr;31(4):785-94.
- <https://clinicaltrials.gov/ct2/show/NCT01571453>

**182. Weisler 1994**

- Weisler RH, Johnston JA, Lineberry CG, Samara B, Branconnier RJ, Billow AA. Comparison of bupropion and trazodone for the treatment of major depression. *J Clin Psychopharmacol.* 1994 Jun;14(3):170-9.

**183. WELL AK140016**

- <https://www.gsk-clinicalstudyregister.com/study/AK140016#rs>

**184. Wheatley 1998**

- Wheatley DP, van Moffaert M, Timmerman L, Kremer CM. Mirtazapine: efficacy and tolerability in comparison with fluoxetine in patients with moderate to severe major depressive disorder. Mirtazapine-Fluoxetine Study Group. *J Clin Psychiatry*. 1998 Jun;59(6):306-12.

**185. Winokur 2003**

- Winokur A, DeMartinis NA 3rd, McNally DP, Gary EM, Cormier JL, Gary KA. Comparative effects of mirtazapine and fluoxetine on sleep physiology measures in patients with major depression and insomnia. *J Clin Psychiatry*. 2003 Oct;64(10):1224-9.

**186. Yang 2003**

- Yang JC, Kim, SW, Yu BH. Milnacipran vs Sertraline in Major Depressive Disorder: A double-blind randomised comparative study on the treatment effect and  $\beta$ -adrenergic receptor responsiveness. *Korean J Psychopharmacol*. 2003;14(4):387-396.

**187. Yevtushenko 2007**

- Yevtushenko VY, Belous AI, Yevtushenko YG, Gusinin SE, Buzik OJ, Agibalova TV. Efficacy and tolerability of escitalopram versus citalopram in major depressive disorder: a 6-week, multicenter, prospective, randomized, double-blind, active-controlled study in adult outpatients. *Clin Ther*. 2007 Nov;29(11):2319-32.

**188. Young 1987**

- Young JP, Coleman A, Lader MH. A controlled comparison of fluoxetine and amitriptyline in depressed out-patients. *Br J Psychiatry*. 1987 Sep;151:337-40.

**189. Zivkov 1995 (Organon 85146, FDA85146)**

- Zivkov M, De Jongh GD. Org 3770 versus amitriptyline: A 6-week randomized double-blind multicentre trial in hospitalized depressed patients. *Human Psychopharmacology*. 1995;10(3):173-180.

**190. 0600A-654**

- Unpublished Report-Wyeth-Ayerst: a double-blind, randomized 12-week study of the safety and efficacy of oral venlafaxine up to 75 mg bid compared with oral fluoxetine up to 20 mg bid in patients with moderate and severe major depression (Protocol 600A-654-AU). 2007.

**191. 29060/356**

- <https://www.gsk-clinicalstudyregister.com/study/29060/356#rs>

## 4 Characteristics of included studies

*eTable 1. Characteristics of included studies.*

| Study Name        | Year | No. of arms included in NMA | No of total study arms | Drug          | Sponsored | No. randomized | Mean age (SD) | % Female | Dose (min-max, mg daily) | Dosing Schedule | Mean Dose Delivered | Baseline Severity Scale | Mean Baseline Severity | Length of trial (weeks) | Diagnostic Criteria | Recruitment | Multi/Single Centre | Treatment Setting       | Patient Status   | Placebo Run in | Rescue Medication |  |
|-------------------|------|-----------------------------|------------------------|---------------|-----------|----------------|---------------|----------|--------------------------|-----------------|---------------------|-------------------------|------------------------|-------------------------|---------------------|-------------|---------------------|-------------------------|------------------|----------------|-------------------|--|
| Aberg-Wisted 2000 | 2000 | 2                           | 2                      | paroxetine    | No        | 177            | *             | *        | 20-40                    | Flexible        | *                   | MADRS                   | 30.70                  | 8                       | DSM-III-R           | Europe      | Multi-center        | Unclear                 | Outpatients only | No             | Unclear           |  |
|                   |      |                             |                        | sertraline    | No        | 176            | *             | *        | 50-150                   | Flexible        | *                   | MADRS                   | 30.30                  |                         |                     |             |                     |                         |                  |                |                   |  |
| Aguglia 1993      | 1993 | 2                           | 2                      | sertraline    | No        | 52             | 57.5 (15.5)   | *        | 50-150                   | Flexible        | 72                  | HAMD 17                 | 24.80                  | 8                       | DSM-III-R           | Europe      | Multi-center        | Unclear                 | Outpatients only | Yes            | Unclear           |  |
|                   |      |                             |                        | fluoxetine    | No        | 56             | 58.9 (17.3)   | *        | 20-60                    | Flexible        | 28                  | HAMD 17                 | 25.10                  |                         |                     |             |                     |                         |                  |                |                   |  |
| Allard 2004       | 2004 | 2                           | 2                      | citalopram    | No        | 75             | 72.5 (5.7)    | *        | 20-30                    | Flexible        | 26                  | MADRS                   | 27.00                  | 8                       | DSM-IV              | Europe      | Multi-center        | Unclear                 | Outpatients only | No             | Unclear           |  |
|                   |      |                             |                        | venlafaxine   | Yes       | 76             | 73.6 (5.9)    | *        | 75-150                   | Flexible        | 116                 | MADRS                   | 27.60                  |                         |                     |             |                     |                         |                  |                |                   |  |
| Altamura 1989b    | 1989 | 2                           | 3                      | amitriptyline | Unclear   | 37             | 66.43 (5.6)   | 0.57     | 75-75                    | Fixed           | 75                  | HAMD 21                 | 29.03                  | 5                       | DSM-III             | Europe      | Multi-center        | Unclear                 | Inpatients only  | Unclear        | Unclear           |  |
|                   |      |                             |                        | trazodone     | Unclear   | 36             | 64.61 (5.7)   | 0.61     | 150-150                  | Fixed           | 150                 | HAMD 21                 | 29.68                  |                         |                     |             |                     |                         |                  |                |                   |  |
| Alves 1999        | 1999 | 2                           | 2                      | fluoxetine    | No        | 47             | 42.3 (12.2)   | *        | 20-40                    | Flexible        | *                   | HAMD 21                 | 26.90                  | 12                      | DSM-IV              | Europe      | Multi-center        | Unclear                 | Outpatients only | No             | Unclear           |  |
|                   |      |                             |                        | venlafaxine   | Yes       | 40             | 45.4 (12)     | *        | 75-150                   | Flexible        | *                   | HAMD 21                 | 27.90                  |                         |                     |             |                     |                         |                  |                |                   |  |
| Amini 2005        | 2005 | 2                           | 2                      | mirtazapine   | No        | 18             | 35 (10.6)     | *        | 30-30                    | Fixed           | 30                  | HAMD 17                 | 25.80                  | 6                       | DSM-IV              | Asia        | Single center       | Secondary/Tertiary care | Both             | No             | Unclear           |  |
|                   |      |                             |                        | fluoxetine    | No        | 18             | 37.7 (11.3)   | *        | 20-20                    | Fixed           | 20                  | HAMD 17                 | 24.80                  |                         |                     |             |                     |                         |                  |                |                   |  |
| Andersen 1986     | 1986 | 2                           | 2                      | citalopram    | Unclear   | 57             | *             | 0.70     | 40-40                    | Fixed           | 40                  | HAMD 17                 | 22.5                   | 5                       | *                   | Europe      | Multi-center        | Secondary/Tertiary care | Inpatients only  | Yes            | Yes               |  |
|                   |      |                             |                        | clomipramine  | Unclear   | 57             | *             | 0.69     | 150-150                  | Fixed           | 150                 | HAMD17                  | 22                     |                         |                     |             |                     |                         |                  |                |                   |  |
| Anseau 1989a      | 1989 | 3                           | 3                      | milnacipran   | Unclear   | 47             | 48.6 (10.9)   | 0.66     | 50-50                    | Fixed           | 50                  | HAMD 17                 | 25.10                  | 4                       | RDC                 | Europe      | Multi-center        | Secondary/Tertiary care | Inpatients only  | Yes            | Yes               |  |
|                   |      |                             |                        | milnacipran   | Unclear   | 48             | 48.6 (10.9)   | 0.66     | 100-100                  | Fixed           | 100                 | HAMD 17                 | 24.40                  |                         |                     |             |                     |                         |                  |                |                   |  |
|                   |      |                             |                        | amitriptyline | No        | 49             | 48.6(10.9)    | 0.66     | 150-150                  | Fixed           | 150                 | HAMD 17                 | 24.80                  |                         |                     |             |                     |                         |                  |                |                   |  |
| Anseau 1989b      | 1989 | 2                           | 2                      | milnacipran   | Unclear   | 44             | 49.6 (11.6)   | *        | 200-200                  | Fixed           | 200                 | HAMD 24                 | 37.30                  | 4                       | RDC                 | Europe      | Multi-center        | Secondary/Tertiary care | Inpatients only  | Yes            | Yes               |  |
|                   |      |                             |                        | amitriptyline | No        | 43             | 49.6 (11.6)   | *        | 150-150                  | Fixed           | 150                 | HAMD 24                 | 37.60                  |                         |                     |             |                     |                         |                  |                |                   |  |

|                                                  |      |   |   |               |         |     |                |      |         |          |     |         |       |   |           |                   |               |                         |                  |         |         |  |  |
|--------------------------------------------------|------|---|---|---------------|---------|-----|----------------|------|---------|----------|-----|---------|-------|---|-----------|-------------------|---------------|-------------------------|------------------|---------|---------|--|--|
| Anseau 1991                                      | 1991 | 3 | 3 | fluvoxamine   | Unclear | 41  | 46.6<br>(11.6) | *    | 200-200 | Fixed    | 200 | HAMD 24 | 32.69 | 4 | RDC       | Europe            | Multi-center  | Secondary/Tertiary care | Inpatients only  | Yes     | Yes     |  |  |
|                                                  |      |   |   | milnacipran   | Unclear | 42  | 49.9<br>(12.4) | *    | 150-150 | Fixed    | 150 | HAMD 24 | 33.94 |   |           |                   |               |                         |                  |         |         |  |  |
|                                                  |      |   |   | milnacipran   | Unclear | 43  | 46.5<br>(13.3) | *    | 200-200 | Fixed    | 200 | HAMD 24 | 31.89 |   |           |                   |               |                         |                  |         |         |  |  |
| Anseau 1994a<br>(MY-1005/BRL-029060/1/CPM S-112) | 1994 | 2 | 2 | paroxetine    | Yes     | 55  | 43.7<br>(11.5) | 0.46 | 20-30   | Flexible | *   | HAMD 21 | 26.00 | 6 | DSM-III-R | Europe            | Multi-center  | Other/Unclear           | Other/Unclear    | Yes     | Unclear |  |  |
|                                                  |      |   |   | fluvoxamine   | No      | 65  | 43.4<br>(9.9)  | 0.67 | 100-200 | Flexible | *   | HAMD 21 | 26.50 |   |           |                   |               |                         |                  |         |         |  |  |
| Anseau 1994b                                     | 1994 | 2 | 2 | milnacipran   | Yes     | 97  | 44.8<br>(11.2) | *    | 100-100 | Fixed    | 100 | HAMD 24 | 30.60 | 6 | DSM-III-R | Europe            | Multi-center  | Secondary/Tertiary care | Outpatients only | Yes     | Yes     |  |  |
|                                                  |      |   |   | fluoxetine    | No      | 93  | 45<br>(12.3)   | *    | 20-20   | Fixed    | 20  | HAMD 24 | 32.40 |   |           |                   |               |                         |                  |         |         |  |  |
| Armitage 1997                                    | 1997 | 2 | 2 | nefazodone    | Yes     | 22  | 37.1<br>(8.4)  | 0.50 | 400-500 | Flexible | 433 | HAMD 17 | 23.50 | 8 | DSM-III-R | North America     | Multi-center  | Other/Unclear           | Outpatients only | Unclear | Unclear |  |  |
|                                                  |      |   |   | fluoxetine    | No      | 21  | 37.2<br>(10.5) | 0.76 | 20-40   | Flexible | 31  | HAMD 17 | 23.60 |   |           |                   |               |                         |                  |         |         |  |  |
| Baldwin 1996                                     | 1996 | 2 | 2 | nefazodone    | Yes     | 105 | 38.3<br>(*)    | 0.60 | 200-600 | Flexible | 472 | HAMD 17 | 24.60 | 8 | DSM-III-R | Europe            | Multi-center  | Secondary/Tertiary care | Outpatients only | Unclear | Yes     |  |  |
|                                                  |      |   |   | paroxetine    | No      | 101 | 37.9<br>(*)    | 0.50 | 20-40   | Flexible | 33  | HAMD 17 | 24.80 |   |           |                   |               |                         |                  |         |         |  |  |
| Baldwin 2006a<br>(97-CRBX-052 - Study 052)       | 2006 | 2 | 2 | reboxetine    | Yes     | 159 | 42.4<br>(12.1) | 0.63 | 8-10    | Flexible | 9   | HAMD 17 | 24.20 | 8 | DSM-IV    | Europe            | Multi-center  | Other/Unclear           | Other/Unclear    | Unclear | Yes     |  |  |
|                                                  |      |   |   | paroxetine    | No      | 166 | 45.1<br>(11)   | 0.62 | 20-40   | Flexible | 27  | HAMD 17 | 24.10 |   |           |                   |               |                         |                  |         |         |  |  |
| Baldwin 2006b<br>(Study 99505)                   | 2006 | 2 | 2 | paroxetine    | No      | 159 | 45.1<br>(13.2) | *    | 20-40   | Flexible | 26  | MADRS   | 29.70 | 8 | DSM-III-R | Europe            | Multi-center  | Other/Unclear           | Other/Unclear    | Yes     | Unclear |  |  |
|                                                  |      |   |   | escitalopram  | Yes     | 166 | 44.9<br>(14.7) | *    | 10-20   | Flexible | 14  | MADRS   | 29.60 |   |           |                   |               |                         |                  |         |         |  |  |
| Battegay 1985<br>(PAR 29060.309 HP/81/162A)      | 1985 | 2 | 2 | paroxetine    | Yes     | 11  | 41.5<br>(11.3) | 0.55 | 30-30   | Fixed    | 30  | *       | *     | 7 | *         | Europe            | Single center | Unclear                 | Unclear          | Unclear | Unclear |  |  |
|                                                  |      |   |   | amitriptyline | No      | 10  | 36.9<br>(10.8) | 0.60 | 100-100 | Fixed    | 100 | *       | *     |   |           |                   |               |                         |                  |         |         |  |  |
| Beasley 1991                                     | 1991 | 2 | 2 | trazodone     | No      | 61  | 40<br>(10.8)   | 0.69 | 50-400  | Flexible | 244 | HAMD 21 | 24.30 | 6 | DSM-III   | North America     | Multi-center  | Unclear                 | Outpatients only | Yes     | Yes     |  |  |
|                                                  |      |   |   | fluoxetine    | Yes     | 65  | 40<br>(11.3)   | 0.65 | 20-60   | Flexible | 21  | HAMD 21 | 23.40 |   |           |                   |               |                         |                  |         |         |  |  |
| Behnke 2003<br>(E-1690, Kjernisted 2002)         | 2003 | 2 | 2 | mirtazapine   | Yes     | 176 | 42<br>(11)     | *    | 30-45   | Flexible | 38  | HAMD 17 | *     | 8 | DSM-IV    | Cross-Continental | Multi-center  | Both                    | Unclear          | No      | Unclear |  |  |
|                                                  |      |   |   | sertraline    | No      | 170 | 41<br>(12)     | *    | 50-150  | Flexible | 93  | HAMD 17 | *     |   |           |                   |               |                         |                  |         |         |  |  |
| Benkert 2000<br>(E-1559)                         | 2000 | 2 | 2 | mirtazapine   | Yes     | 139 | 47.2<br>(11.1) | *    | 15-45   | Flexible | 33  | HAMD 17 | 22.40 | 6 | DSM-IV    | Europe            | Multi-center  | Both                    | Outpatients only | Yes     | Unclear |  |  |
|                                                  |      |   |   | paroxetine    | No      | 136 | 47.3<br>(10.3) | *    | 20-40   | Flexible | 23  | HAMD 17 | 22.40 |   |           |                   |               |                         |                  |         |         |  |  |
| Benkert 2006(C-1763)                             | 2006 | 2 | 2 | mirtazapine   | Yes     | 140 | 46.4<br>(11.1) | 0.56 | 45-45   | Fixed    | 45  | HAMD 17 | 24.60 | 6 | DSM-IV    | Europe            | Multi-center  | Unclear                 | Outpatients only | No      | Unclear |  |  |
|                                                  |      |   |   | venlafaxine   | No      | 135 | 45.1<br>(12.7) | 0.59 | 225-225 | Fixed    | 225 | HAMD17  | 24.90 |   |           |                   |               |                         |                  |         |         |  |  |



|                                       |      |   |   |               |         |     |             |      |         |          |     |                  |       |    |           |                   |              |                         |                  |         |         |
|---------------------------------------|------|---|---|---------------|---------|-----|-------------|------|---------|----------|-----|------------------|-------|----|-----------|-------------------|--------------|-------------------------|------------------|---------|---------|
| Bennie 1995                           | 1995 | 2 | 2 | sertraline    | Yes     | 142 | 49.9 (*)    | *    | 50-100  | Flexible | 62  | HAMD 17          | 23.20 | 6  | DSM-III-R | Europe            | Multi-center | Secondary/Tertiary care | Outpatients only | Yes     | Yes     |
|                                       |      |   |   | fluoxetine    | No      | 144 | 49.9 (*)    | *    | 20-40   | Flexible | 25  | HAMD 17          | 23.40 |    |           |                   |              |                         |                  |         |         |
| Berlanga 1997                         | 1997 | 2 | 2 | nefazodone    | Yes     | 37  | 41.5 (12.8) | 0.78 | 400-500 | Flexible | 400 | HAMD 17          | 25.10 | 8  | DSM-III-R | South America     | Multi-center | Unclear                 | Outpatients only | Unclear | Yes     |
|                                       |      |   |   | fluoxetine    | No      | 37  | 39.9 (13.4) | 0.76 | 20-40   | Flexible | 24  | HAMD 17          | 23.70 |    |           |                   |              |                         |                  |         |         |
| Bersani 1994                          | 1994 | 2 | 2 | sertraline    | Unclear | 34  | 47.2 (12)   | 0.63 | 50-150  | Flexible | 88  | HAMD 21          | 33    | 8  | DSM-III-R | Europe            | Unclear      | Unclear                 | Outpatients only | Unclear | No      |
|                                       |      |   |   | amitriptyline | Unclear | 34  | 46.9 (12)   | 0.63 | 50-150  | Flexible | 84  | HAMD 21          | 32    |    |           |                   |              |                         |                  |         |         |
| Bielski 2004 (SCT-MD-12)              | 2004 | 2 | 2 | escitalopram  | Yes     | 101 | 37.3 (12.3) | *    | 20-20   | Fixed    | 20  | HAMD 24          | 28.60 | 8  | DSM-IV    | North America     | Multi-center | Secondary/Tertiary care | Outpatients only | Yes     | Unclear |
|                                       |      |   |   | venlafaxine   | No      | 101 | 37.5 (11.6) | *    | 225-225 | Fixed    | 225 | HAMD 24          | 27.40 |    |           |                   |              |                         |                  |         |         |
| Bignamini 1992 (PAR 29060/078)        | 1992 | 2 | 2 | paroxetine    | Yes     | 156 | 49.1 (13.8) | *    | 20-30   | Flexible | *   | HAMD 21          | 30.50 | 6  | DSM-III   | Europe            | Multi-center | Unclear                 | Outpatients only | Unclear | Unclear |
|                                       |      |   |   | amitriptyline | No      | 153 | 49.8 (11.9) | *    | 75-150  | Flexible | *   | HAMD 21          | 30.90 |    |           |                   |              |                         |                  |         |         |
| Blacker 1988                          | 1988 | 2 | 4 | amitriptyline | No      | 44  | 42 (12.5)   | *    | 100-100 | Fixed    | 100 | HAMD 21          | 26.70 | 6  | DSM-III   | Europe            | Multi-center | Primary care            | Outpatients only | Unclear | Unclear |
|                                       |      |   |   | trazodone     | Unclear | 112 | 45 (12.8)   | *    | 150-150 | Fixed    | 150 | HAMD 21          | 26.30 |    |           |                   |              |                         |                  |         |         |
| Bosc 1997b (Study 016 - Massana 1999) | 1997 | 2 | 2 | reboxetine    | Yes     | 79  | 44 (12.6)   | 0.72 | 8-10    | Flexible | 8   | HAMD 21          | 28.60 | 8  | DSM-III-R | Cross-Continental | Multi-center | Unclear                 | Both             | Unclear | Yes     |
|                                       |      |   |   | fluoxetine    | No      | 89  | 43.6 (11.8) | 0.72 | 20-40   | Flexible | 23  | HAMD 21          | 27.40 |    |           |                   |              |                         |                  |         |         |
| Bougerol 1997 (Study 91302 - FDA)     | 1997 | 2 | 2 | fluoxetine    | No      | 158 | 41 (*)      | *    | 20-20   | Fixed    | 20  | MADRS            | 31.80 | 8  | DSM-III-R | Europe            | Multi-center | Secondary/Tertiary care | Other/Unclear    | No      | Yes     |
|                                       |      |   |   | citalopram    | Yes     | 158 | 43 (*)      | *    | 40-40   | Fixed    | 40  | MADRS            | 31.20 |    |           |                   |              |                         |                  |         |         |
| Boulenger 2006 (Study 10351)          | 2006 | 2 | 2 | escitalopram  | Yes     | 232 | 43.8 (12.5) | *    | 20-20   | Fixed    | 20  | MADRS            | 35.20 | 24 | DSM-IV    | Europe            | Multi-center | Both                    | Outpatients only | No      | Unclear |
|                                       |      |   |   | paroxetine    | Yes     | 227 | 44.7 (13)   | *    | 40-40   | Fixed    | 40  | MADRS            | 34.80 |    |           |                   |              |                         |                  |         |         |
| Boulenger 2014 (13267A, NCT01140906)  | 2014 | 4 | 4 | placebo       | No      | 158 | 48.1 (13.1) | 0.70 | 0-0     | Fixed    | 0   | MADRS            | 31.50 | 8  | DSM-IV    | Cross-Continental | Multi-center | Secondary/Tertiary care | Both             | Unclear | Yes     |
|                                       |      |   |   | vortioxetine  | Yes     | 152 | 47 (14.6)   | 0.64 | 15-15   | Fixed    | 15  | MADRS            | 31.80 |    |           |                   |              |                         |                  |         |         |
|                                       |      |   |   | vortioxetine  | Yes     | 151 | 46.2 (13.4) | 0.60 | 20-20   | Fixed    | 20  | MADRS            | 31.20 |    |           |                   |              |                         |                  |         |         |
|                                       |      |   |   | duloxetine    | No      | 147 | 45.6 (13.6) | 0.69 | 60-60   | Fixed    | 60  | MADRS            | 31.20 |    |           |                   |              |                         |                  |         |         |
| Bueno 1997                            | 1997 | 2 | 2 | nefazodone    | Unclear | 19  | 46.7 (10.5) | 0.79 | 200-500 | Flexible | *   | HAMD unspecified | *     | 8  | DSM-III-R | South America     | Unclear      | Unclear                 | Outpatients only | Yes     | Unclear |

|                               |      |   |   |               |         |     |                 |      |         |          |     |                     |       |    |                               |                       |                  |                                |                     |         |         |
|-------------------------------|------|---|---|---------------|---------|-----|-----------------|------|---------|----------|-----|---------------------|-------|----|-------------------------------|-----------------------|------------------|--------------------------------|---------------------|---------|---------|
|                               |      |   |   | amitriptyline | Unclear | 18  | 45.2<br>(12.2)  | 0.89 | 50-125  | Flexible | *   | HAMD<br>unspecified | *     |    |                               |                       |                  |                                |                     |         |         |
| Caligiuri 2003                | 2003 | 2 | 3 | bupropion     | No      | 7   | 42<br>(9.8)     | *    | *       | Flexible | 400 | HAMD 17             | 18.40 | 9  | DSM-IV                        | North<br>America      | Single<br>center | Secondary<br>/Tertiary<br>care | Outpatients<br>only | Unclear | Unclear |
|                               |      |   |   | sertraline    | No      | 9   | 42<br>(9.8)     | *    | 50-*    | Flexible | 165 | HAMD 17             | 18.40 | 8  |                               |                       |                  |                                |                     |         |         |
| Casabona 2002<br>(0600B 428)  | 2002 | 2 | 2 | paroxetine    | No      | 56  | *               | *    | 20-20   | Fixed    | 20  | *                   | *     | 8  | DSM-IV                        | Europe                | Multi-<br>center | Unclear                        | Outpatients<br>only | Unclear | Unclear |
|                               |      |   |   | venlafaxine   | Yes     | 58  | *               | *    | 75-75   | Fixed    | 75  | *                   | *     |    |                               |                       |                  |                                |                     |         |         |
| Cassano 2002<br>(29060/421)   | 2002 | 2 | 2 | paroxetine    | Yes     | 123 | 75.61<br>(6.99) | *    | 20-40   | Flexible | *   | HAMD<br>unspecified | 22.95 | 6  | ICD-10                        | Europe                | Multi-<br>center | Unclear                        | Outpatients<br>only | Yes     | Unclear |
|                               |      |   |   | fluoxetine    | No      | 119 | 74.85<br>(6.67) | *    | 20-60   | Flexible | *   | HAMD<br>unspecified | 23.41 |    |                               |                       |                  |                                |                     |         |         |
| Chang 2015                    | 2015 | 2 | 2 | fluoxetine    | No      | 58  | 41.7<br>(12)    | 0.76 | 20-80   | Flexible | 21  | HAMD 21             | 24.30 | 6  | DSM-IV                        | Asia                  | Unclear          | Other/Unclear                  | Outpatients<br>only | Unclear | Yes     |
|                               |      |   |   | venlafaxine   | No      | 54  | 37.5<br>(12.5)  | 0.70 | 75-225  | Flexible | 80  | HAMD 21             | 25.90 |    |                               |                       |                  |                                |                     |         |         |
| Chouinard<br>1983a            | 1983 | 2 | 2 | amitriptyline | Unclear | 41  | 35.1<br>(*)     | *    | 75-150  | Flexible | 119 | HAMD 21             | 26.10 | 13 | Other operati<br>onalize<br>d | North<br>America      | Multi-<br>center | Unclear                        | Outpatients<br>only | Yes     | Yes     |
|                               |      |   |   | bupropion     | Unclear | 77  | 38.9<br>(*)     | *    | 300-450 | Flexible | 374 | HAMD 21             | 26.50 |    |                               |                       |                  |                                |                     |         |         |
| Chouinard 1985                | 1985 | 2 | 2 | fluoxetine    | Unclear | 25  | 41 (*)          | *    | 40-80   | Flexible | 69  | HAMD 21             | 27.60 | 5  | RDC                           | North<br>America      | Multi-<br>center | Secondary<br>/Tertiary<br>care | Outpatients<br>only | Yes     | Yes     |
|                               |      |   |   | amitriptyline | Unclear | 28  | 39 (*)          | *    | 150-300 | Flexible | 163 | HAMD 21             | 25.90 |    |                               |                       |                  |                                |                     |         |         |
| Chouinard 1999<br>(29060/131) | 1999 | 2 | 2 | paroxetine    | Yes     | 102 | 40.6<br>(10.7)  | *    | 20-50   | Flexible | 26  | HAMD 21             | 25.91 | 12 | DSM-<br>III-R                 | North<br>America      | Multi-<br>center | Unclear                        | Unclear             | Yes     | Unclear |
|                               |      |   |   | fluoxetine    | No      | 101 | 41.2<br>(10.7)  | *    | 20-80   | Flexible | 28  | HAMD 21             | 25.45 |    |                               |                       |                  |                                |                     |         |         |
| Christiansen<br>1996          | 1996 | 2 | 2 | paroxetine    | Unclear | 71  | *               | *    | 20-40   | Flexible | *   | HAMD 17             | 23.8  | 8  | *                             | Europe                | Multi-<br>center | Unclear                        | Outpatients<br>only | Unclear | Unclear |
|                               |      |   |   | amitriptyline | Unclear | 73  | *               | *    | 100-150 | Flexible | *   | HAMD 17             | 24.2  |    |                               |                       |                  |                                |                     |         |         |
| CL3-20098-036                 | 2004 | 2 | 2 | agomelatine   | Yes     | 137 | 39.6<br>(10.3)  | 0.72 | 50-50   | Fixed    | 50  | MADRS               | 27.90 | 24 | DSM-IV                        | Cross-<br>Continental | Multi-<br>center | Primary<br>care                | Outpatients<br>only | No      | No      |
|                               |      |   |   | venlafaxine   | No      | 140 | 42.1<br>(10)    | 0.72 | 75-150  | Flexible | *   | MADRS               | 27.90 |    |                               |                       |                  |                                |                     |         |         |
| CL3-20098-048                 | 2008 | 2 | 2 | agomelatine   | Yes     | 213 | 68.6<br>(6.2)   | *    | 25-50   | Flexible | *   | HAMD 17             | 26.30 | 24 | DSM-IV                        | Cross-<br>Continental | Multi-<br>center | Primary<br>care                | Outpatients<br>only | No      | No      |
|                               |      |   |   | paroxetine    | No      | 199 | 68.3<br>(6.2)   | *    | 20-30   | Flexible | *   | HAMD 17             | 26.20 |    |                               |                       |                  |                                |                     |         |         |
| CL3-20098-062                 | 2010 | 2 | 2 | agomelatine   | Yes     | 202 | 43<br>(12.3)    | *    | 25-50   | Flexible | *   | HAMD 17             | 26.20 | 25 | DSM-IV                        | Cross-<br>Continental | Multi-<br>center | Primary<br>care                | Outpatients<br>only | No      | No      |
|                               |      |   |   | duloxetine    | No      | 216 | 42.5<br>(11.9)  | *    | 60-60   | Fixed    | 60  | HAMD 17             | 26.30 |    |                               |                       |                  |                                |                     |         |         |

|                                          |      |   |   |               |         |     |             |      |         |          |     |                  |       |    |           |                   |               |                         |                  |         |         |
|------------------------------------------|------|---|---|---------------|---------|-----|-------------|------|---------|----------|-----|------------------|-------|----|-----------|-------------------|---------------|-------------------------|------------------|---------|---------|
| Clerc 1994                               | 1994 | 2 | 2 | fluoxetine    | No      | 34  | 53.6 (*)    | *    | 40-40   | Fixed    | 40  | HAMD 21          | 29.70 | 6  | DSM-III-R | Europe            | Multi-center  | Secondary/Tertiary care | Inpatients only  | Yes     | Unclear |
|                                          |      |   |   | venlafaxine   | Yes     | 34  | 49 (*)      | *    | 200-200 | Fixed    | 200 | HAMD 21          | 29.10 |    |           |                   |               |                         |                  |         |         |
| Clerc 2001                               | 2001 | 2 | 2 | fluvoxamine   | No      | 56  | 52.2 (12.6) | *    | 200-200 | Fixed    | 200 | HAMD 24          | 31.40 | 6  | DSM-III-R | Europe            | Multi-center  | Secondary/Tertiary care | Both             | Yes     | Yes     |
|                                          |      |   |   | milnacipran   | Yes     | 57  | 48.7 (15.1) | *    | 100-100 | Fixed    | 100 | HAMD 24          | 32.80 |    |           |                   |               |                         |                  |         |         |
| Cohn 1990                                | 1990 | 2 | 2 | sertraline    | Unclear | 161 | 70.2 (*)    | 0.50 | 50-200  | Flexible | 116 | HAMD 17          | 23.7  | 8  | DSM-III   | North America     | Multi-center  | Secondary/Tertiary care | Outpatients only | Yes     | Yes     |
|                                          |      |   |   | amitriptyline | No      | 80  | 70.6 (*)    | 0.46 | 50-150  | Flexible | 88  | HAMD 17          | 25.2  |    |           |                   |               |                         |                  |         |         |
| Colonna 2005 (Study 99022)               | 2005 | 2 | 2 | escitalopram  | Yes     | 175 | 46 (12)     | *    | 10-10   | Fixed    | 10  | MADRS            | 29.50 | 8  | DSM-IV    | Europe            | Multi-center  | Primary care            | Outpatients only | Yes     | Unclear |
|                                          |      |   |   | citalopram    | No      | 182 | 46 (11)     | *    | 20-20   | Fixed    | 20  | MADRS            | 30.20 |    |           |                   |               |                         |                  |         |         |
| Corruble 2013 (CL3-20098-063)            | 2008 | 2 | 2 | agomelatine   | Yes     | 164 | 43.6 (12.9) | 0.73 | 25-50   | Flexible | *   | HAMD 17          | 26.80 | 25 | DSM-IV    | Cross-Continental | Multi-center  | Primary care            | Outpatients only | No      | No      |
|                                          |      |   |   | escitalopram  | No      | 160 | 42.8 (11.8) | 0.69 | 10-20   | Flexible | *   | HAMD 17          | 26.60 |    |           |                   |               |                         |                  |         |         |
| Costaesilva 1998                         | 1998 | 2 | 2 | fluoxetine    | No      | 186 | 39.8 (10.3) | *    | 20-40   | Flexible | *   | HAMD 17          | 29.70 | 8  | DSM-III-R | South America     | Multi-center  | Unclear                 | Outpatients only | No      | Unclear |
|                                          |      |   |   | venlafaxine   | Yes     | 196 | 40.5 (10.7) | *    | 75-150  | Flexible | *   | HAMD 17          | 30.40 |    |           |                   |               |                         |                  |         |         |
| Dalery 2003                              | 2003 | 2 | 2 | fluvoxamine   | Yes     | 90  | 42 (*)      | *    | 100-100 | Fixed    | 100 | HAMD 17          | 22.30 | 6  | DSM-III-R | Europe            | Multi-center  | Secondary/Tertiary care | Outpatients only | Yes     | Yes     |
|                                          |      |   |   | fluoxetine    | No      | 94  | 42.1 (*)    | *    | 20-20   | Fixed    | 20  | HAMD 17          | 22.20 |    |           |                   |               |                         |                  |         |         |
| Debonnel 2000 (Blier 2009, iQWIG E-1639) | 2009 | 2 | 3 | mirtazapine   | Yes     | 21  | 45.9 (9.1)  | 0.29 | 30-45   | Flexible | *   | HAMD 17          | 24.00 | 6  | DSM-IV    | North America     | Single center | Unclear                 | Unclear          | Yes     | Yes     |
|                                          |      |   |   | paroxetine    | No      | 21  | 39.7 (11.8) | 0.48 | 20-30   | Flexible | *   | HAMD 17          | 24.20 |    |           |                   |               |                         |                  |         |         |
| Debus 1988                               | 1988 | 2 | 2 | fluoxetine    | Yes     | 22  | 35.4 (8.6)  | *    | 20-60   | Flexible | 31  | HAMD 21          | 23.40 | 6  | DSM-III   | North America     | Multi-center  | Both                    | Outpatients only | Yes     | No      |
|                                          |      |   |   | trazodone     | No      | 21  | 39.3 (8.3)  | *    | 50-400  | Flexible | 305 | HAMD 21          | 25.20 |    |           |                   |               |                         |                  |         |         |
| Demyttenaere 1998                        | 1998 | 2 | 2 | amitriptyline | No      | 31  | 42.1 (8.1)  | *    | 150-150 | Fixed    | 150 | HAMD unspecified | 23.90 | 9  | DSM-III-R | Europe            | Multi-center  | Secondary/Tertiary care | Outpatients only | Unclear | Unclear |
|                                          |      |   |   | fluoxetine    | Yes     | 35  | 41.4 (8.9)  | *    | 20-20   | Fixed    | 20  | HAMD unspecified | 24.90 |    |           |                   |               |                         |                  |         |         |
| DeRonchi 1998                            | 1988 | 2 | 2 | fluoxetine    | Unclear | 32  | 69.1 (5.92) | *    | 20-20   | Fixed    | 20  | HAMD 17          | 25.60 | 10 | DSM-III-R | Europe            | Multi-center  | Secondary/Tertiary care | Outpatients only | Yes     | Yes     |
|                                          |      |   |   | amitriptyline | Unclear | 33  | 68.6 (7.64) | *    | 50-100  | Fixed    | 100 | HAMD 17          | 26.50 |    |           |                   |               |                         |                  |         |         |
| Deushle 2003 (NCT01049347)               | 2003 | 2 | 2 | amitriptyline | No      | 14  | 49.5 (17.5) | 0.64 | 150-150 | Fixed    | 150 | HAMD unspecified | 21.64 | 5  | DSM-IV    | Europe            | Unclear       | Unclear                 | Inpatients only  | Unclear | Yes     |

|               |             |   |   |               |         |     |                |      |         |          |     |                     |       |    |           |                  |                  |                                |                     |         |         |
|---------------|-------------|---|---|---------------|---------|-----|----------------|------|---------|----------|-----|---------------------|-------|----|-----------|------------------|------------------|--------------------------------|---------------------|---------|---------|
|               |             |   |   | paroxetine    | No      | 21  | 61.2<br>(13)   | 0.67 | 40-40   | Fixed    | 40  | HAMD<br>unspecified | 23.62 |    |           |                  |                  |                                |                     |         |         |
| DeWilde 1983a | 1983        | 2 | 2 | fluvoxamine   | Yes     | 22  | *              | *    | 100-300 | Flexible | 300 | HAMD 17             | 23.40 | 6  | Feighner  | Europe           | Single<br>center | Secondary<br>/Tertiary<br>care | Outpatients<br>only | Unclear | Yes     |
|               |             |   |   | clomipramine  | No      | 21  | *              | *    | 50-150  | Flexible | 144 | HAMD 17             | 24.20 |    |           |                  |                  |                                |                     |         |         |
| DeWilde 1993  | 1993        | 2 | 2 | paroxetine    | Yes     | 49  | 43.9<br>(13.2) | *    | 20-40   | Flexible | *   | HAMD 21             | 27.00 | 6  | DSM-III   | Europe           | Multi-<br>center | Other/Unclear                  | Other/Unclear       | Yes     | Unclear |
|               |             |   |   | fluoxetine    | No      | 50  | 44.3<br>(12)   | *    | 20-60   | Flexible | *   | HAMD 21             | 28.20 |    |           |                  |                  |                                |                     |         |         |
| Dierick 1996  | 1996        | 2 | 2 | fluoxetine    | No      | 161 | 43.2<br>(13)   | 0.64 | 20-20   | Fixed    | 20  | HAMD 17             | 26.60 | 8  | DSM-III-R | Europe           | Multi-<br>center | Unclear                        | Outpatients<br>only | Unclear | Unclear |
|               |             |   |   | venlafaxine   | Yes     | 153 | 43.7<br>(12.5) | 0.65 | 75-150  | Flexible | 112 | HAMD 17             | 27.00 |    |           |                  |                  |                                |                     |         |         |
| DUAG 1990     | 1990        | 2 | 2 | paroxetine    | Unclear | 62  | *              | *    | 30-30   | Fixed    | 30  | HAMD 17             | 23.12 | 6  | DSM-III   | Europe           | Multi-<br>center | Secondary<br>/Tertiary<br>care | Inpatients<br>only  | Yes     | Yes     |
|               |             |   |   | clomipramine  | Unclear | 58  | *              | *    | 150-150 | Fixed    | 150 | HAMD 17             | 23.36 |    |           |                  |                  |                                |                     |         |         |
| E-1569        | unpublished | 2 | 2 | mirtazapine   | Yes     | 73  | 46.5<br>(12.5) | 0.68 | 30-45   | Flexible | *   | HAMD 17             | 24.60 | 6  | DSM-IV    | Europe           | Multi-<br>center | Other/Unclear                  | Outpatients<br>only | Yes     | Unclear |
|               |             |   |   | paroxetine    | No      | 75  | 43<br>(12.5)   | 0.69 | 20-40   | Flexible | *   | HAMD 17             | 25.70 |    |           |                  |                  |                                |                     |         |         |
| Ekselius 1997 | 1997        | 2 | 2 | citalopram    | No      | 200 | 48.1<br>(12)   | *    | 20-60   | Flexible | 34  | MADRS               | 28.30 | 12 | DSM-III-R | Europe           | Multi-<br>center | Primary<br>care                | Outpatients<br>only | Yes     | No      |
|               |             |   |   | sertraline    | Yes     | 200 | 47.3<br>(13.3) | *    | 50-150  | Flexible | 82  | MADRS               | 28.30 |    |           |                  |                  |                                |                     |         |         |
| Falk 1989     | 1989        | 2 | 2 | trazodone     | No      | 13  | 67.5<br>(4)    | *    | 50-400  | Flexible | 350 | HAMD 21             | 26.17 | 6  | DSM-III   | North<br>America | Single<br>center | Secondary<br>/Tertiary<br>care | Outpatients<br>only | Yes     | Unclear |
|               |             |   |   | fluoxetine    | Yes     | 14  | 69.1<br>(6.2)  | *    | 20-60   | Flexible | 48  | HAMD 21             | 23.77 |    |           |                  |                  |                                |                     |         |         |
| Fava 2002     | 2002        | 3 | 3 | sertraline    | No      | 96  | 44<br>(14.7)   | *    | 50-200  | Flexible | 108 | HAMD 17             | 21.00 | 10 | DSM-IV    | North<br>America | Multi-<br>center | Secondary<br>/Tertiary<br>care | Outpatients<br>only | Yes     | Yes     |
|               |             |   |   | fluoxetine    | Yes     | 92  | 42.1<br>(13.5) | *    | 20-60   | Flexible | 42  | HAMD 17             | 20.50 |    |           |                  |                  |                                |                     |         |         |
|               |             |   |   | paroxetine    | No      | 96  | 42.5<br>(14.7) | *    | 20-60   | Flexible | 37  | HAMD 17             | 20.60 |    |           |                  |                  |                                |                     |         |         |
| Fawcett 1989  | 1989        | 2 | 2 | amitriptyline | No      | 20  | 44.5<br>(10.3) | *    | 50-200  | Flexible | *   | HAMD 21             | 23.50 | 6  | DSM-III   | North<br>America | Multi-<br>center | Secondary<br>/Tertiary<br>care | Outpatients<br>only | Yes     | Yes     |
|               |             |   |   | fluoxetine    | Yes     | 20  | 39.9<br>(10.6) | *    | 20-60   | Flexible | *   | HAMD 21             | 23.60 |    |           |                  |                  |                                |                     |         |         |
| Feiger 1996   | 1996        | 2 | 2 | nefazodone    | Yes     | 78  | 44.5<br>(11.5) | 0.55 | 100-600 | Flexible | 456 | HAMD 17             | 23.30 | 6  | DSM-III-R | North<br>America | Multi-<br>center | Other/Unclear                  | Outpatients<br>only | Unclear | Yes     |
|               |             |   |   | sertraline    | No      | 82  | 43.1<br>(10)   | 0.48 | 50-200  | Flexible | 148 | HAMD 17             | 23.30 |    |           |                  |                  |                                |                     |         |         |
| Feighner 1991 | 1991        | 2 | 2 | fluoxetine    | No      | 62  | 42.9<br>(*)    | *    | 20-80   | Flexible | 38  | HAMD 17             | 26.10 | 6  | DSM-III-R | North<br>America | Multi-<br>center | Unclear                        | Outpatients<br>only | Yes     | Unclear |
|               |             |   |   | bupropion     | Yes     | 61  | 40.9<br>(*)    | *    | 225-450 | Flexible | 382 | HAMD 17             | 25.30 |    |           |                  |                  |                                |                     |         |         |

|                                            |      |   |   |               |         |     |             |      |         |          |     |                  |       |    |           |                   |               |                         |                  |         |         |
|--------------------------------------------|------|---|---|---------------|---------|-----|-------------|------|---------|----------|-----|------------------|-------|----|-----------|-------------------|---------------|-------------------------|------------------|---------|---------|
| Fudge 1990                                 | 1990 | 2 | 2 | fluoxetine    | Unclear | 21  | *           | *    | 20-60   | Flexible | *   | HAMD unspecified | 23.20 | 6  | DSM-III   | North America     | Single center | Secondary/Tertiary care | Outpatients only | Yes     | Unclear |
|                                            |      |   |   | trazodone     | Unclear | 17  | *           | *    | 50-400  | Flexible | *   | HAMD unspecified | 23.60 |    |           |                   |               |                         |                  |         |         |
| Gagliano 1993                              | 1993 | 2 | 2 | paroxetine    | Yes     | 45  | 37.8 (12.5) | *    | 20-40   | Flexible | *   | HAMD 21          | 25.00 | 6  | DSM-III   | Africa            | Single center | Unclear                 | Outpatients only | Yes     | Unclear |
|                                            |      |   |   | fluoxetine    | No      | 45  | 39.6 (11.7) | *    | 20-60   | Flexible | *   | HAMD 21          | 24.50 |    |           |                   |               |                         |                  |         |         |
| Gentil 2000                                | 2000 | 2 | 2 | venlafaxine   | Yes     | 57  | 37.9 (10.1) | *    | 75-150  | Flexible | 103 | HAMD 21          | 23.90 | 8  | DSM-IV    | South America     | Multi-center  | Unclear                 | Outpatients only | Yes     | Yes     |
|                                            |      |   |   | amitriptyline | No      | 59  | 39.1 (8.7)  | *    | 75-150  | Flexible | 103 | HAMD 21          | 24.50 |    |           |                   |               |                         |                  |         |         |
| Geretsegger 1995 (MY-060/BRL-029060/1)     | 1995 | 2 | 2 | paroxetine    | Yes     | 44  | 71 (*)      | *    | 20-30   | Flexible | *   | HAMD 21          | 26.80 | 6  | DSM-III   | Europe            | Multi-center  | Unclear                 | Inpatients only  | No      | Unclear |
|                                            |      |   |   | amitriptyline | No      | 47  | 71.3 (*)    | *    | 100-150 | Flexible | *   | HAMD 21          | 28.30 |    |           |                   |               |                         |                  |         |         |
| Gerner 1980                                | 1980 | 2 | 3 | trazodone     | Yes     | 19  | 68.4 (*)    | 0.62 | 100-400 | Flexible | 305 | HAMD unspecified | 27.38 | 4  | RDC       | North America     | Unclear       | Unclear                 | Outpatients only | Unclear | Unclear |
|                                            |      |   |   | placebo       | No      | 20  | 68.4 (*)    | 0.62 | 0-0     | Flexible | 0   | HAMD unspecified | 25.00 |    |           |                   |               |                         |                  |         |         |
| Gillin 1997                                | 1997 | 2 | 2 | nefazodone    | Yes     | 24  | 35.3 (8.8)  | 0.67 | 400-500 | Flexible | 435 | HAMD 17          | 22.90 | 8  | DSM-III-R | North America     | Multi-center  | Unclear                 | Outpatients only | Unclear | Unclear |
|                                            |      |   |   | fluoxetine    | No      | 20  | 36.7 (8.5)  | 0.70 | 20-40   | Flexible | 34  | HAMD 17          | 23.20 |    |           |                   |               |                         |                  |         |         |
| Ginestet 1989                              | 1989 | 2 | 2 | fluoxetine    | Unclear | 28  | 46.5 (10.8) | 0.71 | 20-80   | Flexible | 58  | HAMD 21          | 33.10 | 8  | DSM-III   | Europe            | Multi-center  | Secondary/Tertiary care | Inpatients only  | Unclear | Yes     |
|                                            |      |   |   | clomipramine  | No      | 26  | 51.6 (11)   | 0.73 | 50-200  | Flexible | 148 | HAMD 21          | 33.70 |    |           |                   |               |                         |                  |         |         |
| Guelfi 1998                                | 1998 | 3 | 3 | milnacipran   | Yes     | 100 | 45.6 (12.4) | *    | 100-100 | Fixed    | 100 | HAMD 17          | 27.90 | 12 | DSM-III-R | Europe            | Multi-center  | Secondary/Tertiary care | Inpatients only  | Yes     | Yes     |
|                                            |      |   |   | milnacipran   | Yes     | 100 | 45.2 (12.5) | *    | 200-200 | Fixed    | 200 | HAMD 17          | 27.70 |    |           |                   |               |                         |                  |         |         |
|                                            |      |   |   | fluoxetine    | No      | 100 | 45.8 (12.8) | *    | 20-20   | Fixed    | 20  | HAMD 17          | 27.40 |    |           |                   |               |                         |                  |         |         |
| Guillibert 1989 (PAR 290 MDF 29060 1727 M) | 1989 | 2 | 2 | clomipramine  | No      | 39  | 68.1 (6.1)  | *    | 75-75   | Fixed    | 75  | HAMD 21          | 27.50 | 6  | DSM-III   | Europe            | Multi-center  | Unclear                 | Unclear          | Yes     | Yes     |
|                                            |      |   |   | paroxetine    | Yes     | 40  | 69.3 (5.3)  | *    | 30-30   | Fixed    | 30  | HAMD 21          | 27.90 |    |           |                   |               |                         |                  |         |         |
| Hackett 1998                               | 1998 | 2 | 2 | fluvoxamine   | No      | 34  | *           | *    | 200-200 | Fixed    | 200 | MADRS            | 31.60 | 6  | DSM-III-R | Europe            | Multi-center  | Unclear                 | Outpatients only | No      | Unclear |
|                                            |      |   |   | venlafaxine   | Yes     | 77  | *           | *    | 150-150 | Fixed    | 150 | MADRS            | 32.20 |    |           |                   |               |                         |                  |         |         |
| Hale 2010 (CL3-20098-045)                  | 2008 | 2 | 2 | agomelatine   | Yes     | 252 | 41.8 (11.2) | 0.77 | 25-50   | Flexible | *   | HAMD 17          | 28.50 | 24 | DSM-IV    | Cross-Continental | Multi-center  | Primary care            | Outpatients only | No      | No      |
|                                            |      |   |   | fluoxetine    | No      | 263 | 42.7 (11.9) | 0.78 | 20-40   | Flexible | *   | HAMD 17          | 28.70 |    |           |                   |               |                         |                  |         |         |
| Hao 2014                                   | 2014 | 2 | 2 | duloxetine    | Yes     | 140 | 38.4 (13)   | 0.56 | 60-60   | Fixed    | 60  | HAMD 17          | 23.70 | 6  | DSM-IV    | Asia              | Multi-center  | Both                    | Both             | No      | Yes     |
|                                            |      |   |   | paroxetine    | No      | 141 | 38.5 (1.6)  | 0.62 | 20-20   | Fixed    | 20  | HAMD 17          | 23.70 |    |           |                   |               |                         |                  |         |         |

|                                        |      |   |   |               |         |     |                  |      |          |               |     |                  |       |    |                       |               |               |                         |                  |         |         |
|----------------------------------------|------|---|---|---------------|---------|-----|------------------|------|----------|---------------|-----|------------------|-------|----|-----------------------|---------------|---------------|-------------------------|------------------|---------|---------|
| Harris 1991                            | 1991 | 2 | 2 | fluvoxamine   | Unclear | 35  | 38.6<br>(12.1)   | 0.63 | 50-150   | Flexible      | 115 | HAMD 17          | 22.70 | 6  | DSM-III               | Europe        | Multi-center  | Secondary/Tertiary care | Outpatients only | Yes     | Yes     |
|                                        |      |   |   | amitriptyline | Unclear | 34  | 48.1<br>(12.3)   | 0.82 | 50-150   | Flexible      | 99  | HAMD 17          | 22.80 |    |                       |               |               |                         |                  |         |         |
| Heller 2009<br>(NCT00909155)           | 2009 | 2 | 2 | venlafaxine   | Yes     | 15  | 30.74<br>(11.5)  | 0.53 | 75-300   | Flexible      | 118 | HAMD 21          | 20.07 | 24 | DSM-IV                | North America | Unclear       | /Unclear                | Other/Unclear    | Unclear | Unclear |
|                                        |      |   |   | fluoxetine    | No      | 14  | 33.14<br>(10.7)  | 0.57 | 20-80    | Flexible      | 37  | HAMD 21          | 21.36 |    |                       |               |               |                         |                  |         |         |
| Hicks 2002                             | 2002 | 2 | 2 | nefazodone    | Yes     | 20  | 42.8<br>(11.9)   | 0.40 | 400-600  | Flexible      | 495 | HAMD unspecified | 21.60 | 24 | DSM-IV                | Europe        | Single center | Secondary/Tertiary care | Outpatients only | Unclear | No      |
|                                        |      |   |   | paroxetine    | No      | 20  | 43<br>(10.1)     | 0.45 | 20-40    | Flexible      | 30  | HAMD unspecified | 22.30 |    |                       |               |               |                         |                  |         |         |
| Hong 2003<br>(22521)                   | 2003 | 2 | 2 | mirtazapine   | Yes     | 66  | 47.2<br>(14.7)   | *    | 30-45    | Flexible      | 34  | HAMD 17          | 23.10 | 6  | DSM-IV                | Asia          | Multi-center  | Secondary/Tertiary care | Outpatients only | Yes     | Unclear |
|                                        |      |   |   | fluoxetine    | No      | 66  | 47.1<br>(15.5)   | *    | 20-40    | Flexible      | 31  | HAMD 17          | 24.30 |    |                       |               |               |                         |                  |         |         |
| Hosseini 2015<br>(IRCT201203048513N1.) | 2015 | 2 | 2 | venlafaxine   | No      | 28  | 37.12<br>(10.9)  | 0.75 | 37.5-150 | Other/Unclear | *   | HAMD unspecified | 19.88 | 8  | DSM-IV                | Asia          | Single center | Secondary/Tertiary care | Outpatients only | Unclear | Unclear |
|                                        |      |   |   | citalopram    | No      | 25  | 35.6<br>(8.72)   | 0.91 | 10-40    | Other/Unclear | *   | HAMD unspecified | 17.63 |    |                       |               |               |                         |                  |         |         |
| Hsu 2011                               | 2011 | 2 | 2 | citalopram    | No      | 25  | 43.4<br>(11.4)   | *    | 20-*     | Flexible      | 23  | MADRS            | 36.60 | 6  | DSM-IV                | Asia          | Single center | Secondary/Tertiary care | Other/Unclear    | No      | Yes     |
|                                        |      |   |   | sertraline    | No      | 26  | 38<br>(13.8)     | *    | 50-*     | Flexible      | 57  | MADRS            | 38.20 |    |                       |               |               |                         |                  |         |         |
| Hu 2009                                | 2009 | 2 | 2 | escitalopram  | Unclear | 25  | 30.92<br>(8.04)  | 0.52 | 10-20    | Flexible      | *   | HAMD 17          | 21.30 | 6  | Other operationalized | Asia          | Single center | Secondary/Tertiary care | Outpatients only | Yes     | Yes     |
|                                        |      |   |   | citalopram    | Unclear | 23  | 30.61<br>(8.61)  | 0.57 | 20-40    | Flexible      | *   | HAMD 17          | 20.78 |    |                       |               |               |                         |                  |         |         |
| Hutchinson 1992                        | 1992 | 2 | 2 | amitriptyline | No      | 32  | 71.5<br>(9.5)    | *    | 100-100  | Fixed         | 100 | HAMD 21          | 20.28 | 6  | DSM-III               | Europe        | Multi-center  | Primary care            | Outpatients only | Yes     | Yes     |
|                                        |      |   |   | paroxetine    | Yes     | 58  | 72<br>(5.6)      | *    | 30-30    | Fixed         | 30  | HAMD 21          | 21.56 |    |                       |               |               |                         |                  |         |         |
| Jiang 2009                             | 2009 | 2 | 2 | escitalopram  | Unclear | 32  | 38.62<br>(11.54) | 0.56 | 10-20    | Flexible      | *   | HAMD 17          | 23.82 | 6  | Other operationalized | Asia          | Single center | Secondary/Tertiary care | Both             | Unclear | Yes     |
|                                        |      |   |   | citalopram    | Unclear | 32  | 39.23<br>(11.9)  | 0.53 | 20-60    | Flexible      | *   | HAMD 17          | 23.46 |    |                       |               |               |                         |                  |         |         |
| Judd 1993                              | 1993 | 2 | 2 | fluoxetine    | Yes     | 30  | 41.7<br>(9.8)    | 0.66 | 20-20    | Fixed         | 20  | HAMD 17          | 24.40 | 6  | DSM-III-R             | Australia     | Multi-center  | Unclear                 | Unclear          | Yes     | Yes     |
|                                        |      |   |   | amitriptyline | No      | 28  | 41.7<br>(9.8)    | 0.66 | 150-200  | Flexible      | 171 | HAMD 17          | 23.70 |    |                       |               |               |                         |                  |         |         |
| Kamijima 2013<br>(japicCTI-090733)     | 2013 | 3 | 3 | milnacipran   | Yes     | 303 | 35.9<br>(10.4)   | 0.53 | 100-100  | Fixed         | 100 | HAMD 17          | 22.10 | 9  | DSM-IV                | Asia          | Multi-center  | Unclear                 | Both             | Yes     | Yes     |
|                                        |      |   |   | milnacipran   | Yes     | 301 | 36.7<br>(10.5)   | 0.51 | 200-200  | Fixed         | 200 | HAMD 17          | 22.30 |    |                       |               |               |                         |                  |         |         |

|                                          |                 |   |   |               |         |     |                |      |         |          |     |                     |       |    |                       |               |               |                         |                  |         |         |
|------------------------------------------|-----------------|---|---|---------------|---------|-----|----------------|------|---------|----------|-----|---------------------|-------|----|-----------------------|---------------|---------------|-------------------------|------------------|---------|---------|
|                                          |                 |   |   | paroxetine    | No      | 301 | 36.6<br>(11.1) | 0.55 | 30-40   | Flexible | *   | HAMD 17             | 22.10 |    |                       |               |               |                         |                  |         |         |
| Kasper 2005b                             | 2005            | 2 | 2 | paroxetine    | Unclear | 53  | 44.3<br>(11.3) | 0.68 | 20-40   | Flexible | 22  | HAMD 17             | 20.90 | 6  | DSM-IV                | Europe        | Multi-center  | Unclear                 | Outpatients only | Yes     | Yes     |
|                                          |                 |   |   | trazodone     | Unclear | 55  | 43.5<br>(12.2) | 0.58 | 150-450 | Flexible | 305 | HAMD 17             | 21.00 |    |                       |               |               |                         |                  |         |         |
| Keegan 1991                              | 1991            | 2 | 2 | fluoxetine    | Yes     | 20  | 39.5<br>(13.6) | 0.67 | 20-80   | Flexible | 53  | HAMD 21             | *     | 6  | DSM-III               | North America | Multi-center  | Unclear                 | Unclear          | Yes     | Yes     |
|                                          |                 |   |   | amitriptyline | No      | 22  | 47.8<br>(14.2) | 0.67 | 100-250 | Flexible | 171 | HAMD 21             | *     |    |                       |               |               |                         |                  |         |         |
| Keller 2007<br>(NCT00046020)             | 2007            | 2 | 2 | fluoxetine    | Unclear | 275 | 40<br>(11.6)   | *    | 20-60   | Flexible | 50  | HAMD 17             | 23.00 | 10 | DSM-IV                | North America | Multi-center  | Secondary/Tertiary care | Outpatients only | Unclear | No      |
|                                          |                 |   |   | venlafaxine   | Yes     | 821 | 39.6<br>(11.2) | *    | 75-300  | Flexible | 208 | HAMD 17             | 22.60 |    |                       |               |               |                         |                  |         |         |
| Kennedy 2005<br>(SCT-MD-16)              | unpublis<br>hed | 2 | 2 | escitalopram  | Yes     | 102 | 37.1<br>(11.4) | *    | 10-20   | Flexible | *   | HAMD<br>unspecified | 25.90 | 8  | DSM-IV                | North America | Multi-center  | Unclear                 | Outpatients only | Unclear | Unclear |
|                                          |                 |   |   | fluoxetine    | No      | 103 | 37<br>(11.8)   | *    | 20-40   | Flexible | *   | HAMD<br>unspecified | 26.50 |    |                       |               |               |                         |                  |         |         |
| Kerkhofs 1990                            | 1990            | 2 | 2 | fluoxetine    | Yes     | 16  | 45.3<br>(12.7) | 0.69 | 60-60   | Fixed    | 60  | HAMD<br>unspecified | 21.90 | 6  | RDC                   | Europe        | Unclear       | Unclear                 | Other/Unclear    | Yes     | Yes     |
|                                          |                 |   |   | amitriptyline | No      | 18  | 46.2<br>(11.4) | 0.61 | 150-150 | Fixed    | 150 | HAMD<br>unspecified | 21.80 |    |                       |               |               |                         |                  |         |         |
| Khan 2007<br>(SCT-MD-23,<br>NCT00108979) | 2007            | 2 | 2 | escitalopram  | Yes     | 140 | 41.8<br>(12.7) | *    | 10-20   | Flexible | *   | HAMD 24             | 26.60 | 8  | DSM-IV                | North America | Multi-center  | Unclear                 | Outpatients only | Unclear | Unclear |
|                                          |                 |   |   | duloxetine    | No      | 138 | 43<br>(13.4)   | *    | 60-60   | Fixed    | 60  | HAMD 24             | 26.90 |    |                       |               |               |                         |                  |         |         |
| Kiev 1997                                | 1997            | 2 | 2 | fluvoxamine   | Yes     | 30  | 42.7<br>(*)    | *    | 50-150  | Flexible | 102 | HAMD 21             | 24.40 | 7  | DSM-III-R             | North America | Multi-center  | Secondary/Tertiary care | Outpatients only | Yes     | Yes     |
|                                          |                 |   |   | paroxetine    | No      | 30  | 39.9<br>(*)    | *    | 20-50   | Flexible | 36  | HAMD 21             | 24.40 |    |                       |               |               |                         |                  |         |         |
| Kuhs 1989<br>(MDUK_29060_III_85_043)     | 1989            | 2 | 2 | paroxetine    | Yes     | 12  | 39.2<br>(11.8) | 0.9  | 30-30   | Fixed    | 30  | HAMD 21             | 24.60 | 6  | DSM-III               | Europe        | Single center | Other/Unclear           | Other/Unclear    | Yes     | Unclear |
|                                          |                 |   |   | amitriptyline | No      | 12  | 39.1<br>(11.5) | 1.0  | 150-150 | Fixed    | 150 | HAMD 21             | 25.00 |    |                       |               |               |                         |                  |         |         |
| Laakman 1988                             | 1988            | 2 | 2 | fluoxetine    | Unclear | 63  | *              | *    | 20-60   | Flexible | *   | HAMD<br>unspecified | 26.7  | 5  | Other operationalized | Europe        | Unclear       | Other/Unclear           | Outpatients only | Yes     | Yes     |
|                                          |                 |   |   | amitriptyline | Unclear | 65  | *              | *    | 50-150  | Flexible | *   | HAMD<br>unspecified | 23.8  |    |                       |               |               |                         |                  |         |         |
| Lalit 2004                               | 2004            | 3 | 3 | escitalopram  | Yes     | 69  | 33 (8)         | *    | 10-20   | Flexible | *   | HAMD 17             | 26.00 | 4  | ICD-10                | Asia          | Multi-center  | Other/Unclear           | Outpatients only | No      | Yes     |
|                                          |                 |   |   | citalopram    | Yes     | 74  | 33 (9)         | *    | 20-40   | Flexible | *   | HAMD 17             | 25.00 |    |                       |               |               |                         |                  |         |         |
|                                          |                 |   |   | sertraline    | No      | 71  | 37<br>(11)     | *    | 100-150 | Flexible | *   | HAMD 17             | 25.00 |    |                       |               |               |                         |                  |         |         |
| Lapierre 1980                            | 1980            | 2 | 2 | amitriptyline | Unclear | 20  | *              | *    | 150-150 | Fixed    | 150 | *                   | *     | 4  | Feighner              | North America | Unclear       | Secondary/Tertiary care | Both             | Yes     | Unclear |
|                                          |                 |   |   | trazodone     | Unclear | 20  | *              | *    | 150-150 | Fixed    | 150 | *                   | *     |    |                       |               |               |                         |                  |         |         |

|                                      |      |   |   |               |         |     |                |      |         |          |     |                  |       |    |                       |                   |               |                         |                  |         |         |
|--------------------------------------|------|---|---|---------------|---------|-----|----------------|------|---------|----------|-----|------------------|-------|----|-----------------------|-------------------|---------------|-------------------------|------------------|---------|---------|
| Lee 2007 (F1J-AA-HMCV) (NCT00489775) | 2007 | 2 | 2 | duloxetine    | Yes     | 238 | 39<br>(13.9)   | *    | 60-60   | Fixed    | 60  | HAMD 17          | 21.10 | 8  | DSM-IV                | *                 | Multi-center  | Secondary/Tertiary care | Both             | No      | Unclear |
|                                      |      |   |   | paroxetine    | No      | 240 | 38<br>(15.3)   | *    | 20-20   | Fixed    | 20  | HAMD 17          | 21.20 |    |                       |                   |               |                         |                  |         |         |
| Leinonen 1997                        | 1997 | 2 | 2 | milnacipran   | Yes     | 52  | 49.2<br>(9.8)  | *    | 100-200 | Flexible | *   | HAMD 17          | 23.70 | 26 | DSM-III-R             | Europe            | Multi-center  | Secondary/Tertiary care | Both             | Unclear | Yes     |
|                                      |      |   |   | clomipramine  | No      | 55  | 47.1<br>(10.6) | *    | 75-150  | Flexible | *   | HAMD 17          | 23.10 |    |                       |                   |               |                         |                  |         |         |
| Leinonen 1999 (Agren1995)            | 1999 | 2 | 2 | mirtazapine   | Yes     | 137 | 42.1<br>(12.3) | *    | 15-60   | Flexible | 35  | MADRS            | 29.60 | 8  | DSM-IV                | Europe            | Multi-center  | Secondary/Tertiary care | Both             | Yes     | Yes     |
|                                      |      |   |   | citalopram    | No      | 133 | 41.1<br>(10.8) | *    | 20-60   | Flexible | 37  | MADRS            | 29.10 |    |                       |                   |               |                         |                  |         |         |
| Lemoine 2007 (CL3-20098-035)         | 2004 | 2 | 4 | agomelatine   | Yes     | 165 | 40.7<br>(10.7) | 0.75 | 25-50   | Fixed    | 50  | HAMD 17          | 25.90 | 24 | DSM-IV                | Europe            | Multi-center  | Primary care            | Outpatients only | No      | No      |
|                                      |      |   |   | venlafaxine   | No      | 167 | 39.6<br>(10.3) | 0.67 | 75-150  | Fixed    | 150 | HAMD 17          | 26.00 |    |                       |                   |               |                         |                  |         |         |
| Lepine 2000                          | 2000 | 2 | 2 | sertraline    | Yes     | 82  | 42.3<br>(*)    | 0.71 | 50-200  | Flexible | 114 | HAMD 17          | 29.8  | 8  | DSM-III-R             | Cross-Continental | Multi-center  | Secondary/Tertiary care | Outpatients only | Yes     | Yes     |
|                                      |      |   |   | clomipramine  | No      | 84  | 41.8<br>(*)    | 0.69 | 50-150  | Flexible | 98  | HAMD 17          | 29.6  |    |                       |                   |               |                         |                  |         |         |
| Li 2006                              | 2006 | 2 | 2 | escitalopram  | Unclear | 28  | 36.5<br>(12.8) | 0.55 | 10-20   | Flexible | *   | HAMD 17          | 23.70 | 6  | Other operationalized | Asia              | Single center | Secondary/Tertiary care | Outpatients only | Unclear | Yes     |
|                                      |      |   |   | citalopram    | Unclear | 28  | 34.4<br>(11.9) | 0.53 | 20-40   | Flexible | *   | HAMD 17          | 23.80 |    |                       |                   |               |                         |                  |         |         |
| Li 2010                              | 2010 | 2 | 2 | escitalopram  | Yes     | 24  | *              | *    | 10-20   | Flexible | *   | HAMD unspecified | *     | 6  | Other operationalized | Asia              | Multi-center  | Other/Unclear           | Other/Unclear    | Unclear | Unclear |
|                                      |      |   |   | citalopram    | Yes     | 24  | *              | *    | 20-40   | Flexible | *   | HAMD unspecified | *     |    |                       |                   |               |                         |                  |         |         |
| Manna 1989                           | 1989 | 2 | 2 | fluoxetine    | Unclear | 15  | 47.7<br>(10)   | 0.63 | 20-20   | Fixed    | 20  | HAMD 17          | 25.7  | 5  | DSM-III               | Europe            | Unclear       | Secondary/Tertiary care | Inpatients only  | Unclear | Unclear |
|                                      |      |   |   | clomipramine  | Unclear | 15  | 48.5<br>(8.36) | 0.63 | 75-75   | Fixed    | 75  | HAMD 17          | 25    |    |                       |                   |               |                         |                  |         |         |
| Mao 2008                             | 2008 | 2 | 2 | fluoxetine    | No      | 117 | 40.7<br>(13.9) | 0.74 | 20-20   | Fixed    | 20  | HAMD 17          | 24.10 | 8  | DSM-IV                | Asia              | Multi-center  | Secondary/Tertiary care | Both             | No      | Yes     |
|                                      |      |   |   | escitalopram  | Yes     | 123 | 37.1<br>(14.1) | 0.61 | 10-10   | Fixed    | 10  | HAMD 17          | 24.70 |    |                       |                   |               |                         |                  |         |         |
| Marchesi 1998                        | 1998 | 2 | 2 | fluoxetine    | Yes     | 67  | 43.6<br>(11.9) | 0.73 | 20-20   | Fixed    | 20  | HAMD 17          | 25.50 | 10 | DSM-III-R             | Europe            | Multi-center  | Secondary/Tertiary care | Outpatients only | Yes     | Yes     |
|                                      |      |   |   | amitriptyline | No      | 75  | 43.6<br>(11.9) | 0.75 | 75-225  | Flexible | 115 | HAMD 17          | 25.30 |    |                       |                   |               |                         |                  |         |         |
| McPartlin 1998                       | 1998 | 2 | 2 | paroxetine    | No      | 178 | 44<br>(14)     | *    | 20-20   | Fixed    | 20  | HAMD 17          | 23.00 | 12 | DSM-IV                | Europe            | Multi-center  | Primary care            | Outpatients only | Unclear | Yes     |



|                                                       |                 |   |   |                  |     |     |                |      |         |          |     |         |       |    |               |                       |                  |                                |                     |         |         |
|-------------------------------------------------------|-----------------|---|---|------------------|-----|-----|----------------|------|---------|----------|-----|---------|-------|----|---------------|-----------------------|------------------|--------------------------------|---------------------|---------|---------|
|                                                       |                 |   |   | venlafaxine      | Yes | 183 | 45<br>(15)     | *    | 75-75   | Fixed    | 75  | HAMD 17 | 23.00 |    |               |                       |                  |                                |                     |         |         |
| MDF/29060/III/<br>070/88/MC                           | unpublis<br>hed | 2 | 2 | paroxetine       | Yes | 32  | 73 (*)         |      | 20-30   | Flexible | *   | MADRS   | 30.88 | 5  | Feighne<br>r  | Europe                | Multi-<br>center | Other/Unc<br>lear              | Outpatients<br>only | Yes     | Yes     |
|                                                       |                 |   |   | clomipramin<br>e | No  | 30  | 73 (*)         |      | 60-75   | Flexible | *   | MADRS   | 29.00 |    |               |                       |                  |                                |                     |         |         |
| Mehtonen<br>2000                                      | 2000            | 2 | 2 | sertraline       | No  | 72  | 41<br>(10.7)   | *    | 50-100  | Flexible | *   | HAMD 21 | 25.80 | 8  | DSM-IV        | Europe                | Multi-<br>center | Other/Unc<br>lear              | Outpatients<br>only | No      | Unclear |
|                                                       |                 |   |   | venlafaxine      | Yes | 75  | 44.1<br>(11.4) | *    | 75-150  | Flexible | *   | HAMD 21 | 25.50 |    |               |                       |                  |                                |                     |         |         |
| Miura 2000                                            | 2000            | 2 | 2 | paroxetine       | Yes | 109 | 45.9<br>(13.9) | *    | 20-40   | Flexible | 32  | HAMD 17 | 23.80 | 6  | DSM-IV        | Asia                  | Multi-<br>center | Secondary<br>/Tertiary<br>care | Both                | No      | Yes     |
|                                                       |                 |   |   | amitriptyline    | No  | 119 | 47.1<br>(13.8) | *    | 50-150  | Flexible | 109 | HAMD 17 | 23.90 |    |               |                       |                  |                                |                     |         |         |
| Moller 1998<br>(Hegerl 1997)                          | 1998            | 2 | 2 | amitriptyline    | No  | 79  | 49.5<br>(12.9) | 0.71 | 75-225  | Flexible | 141 | HAMD 21 | 29.1  | 6  | DSM-<br>III-R | Europe                | Multi-<br>center | Secondary<br>/Tertiary<br>care | Inpatients<br>only  | No      | Yes     |
|                                                       |                 |   |   | sertraline       | Yes | 81  | 47.7<br>(13)   | 0.69 | 50-150  | Flexible | 105 | HAMD 21 | 28.3  |    |               |                       |                  |                                |                     |         |         |
| Moller 2000                                           | 2000            | 2 | 2 | sertraline       | Yes | 116 | 47.7<br>(13.2) | *    | 50-100  | Flexible | 55  | HAMD 21 | 27.10 | 6  | DSM-<br>III-R | Europe                | Multi-<br>center | Both                           | Outpatients<br>only | No      | Yes     |
|                                                       |                 |   |   | amitriptyline    | No  | 124 | 48.1<br>(14)   | *    | 75-150  | Flexible | 87  | HAMD 21 | 27.50 |    |               |                       |                  |                                |                     |         |         |
| Montgomery<br>2004a (Study<br>99067)                  | 2004            | 2 | 2 | escitalopram     | Yes | 148 | 49<br>(15)     | *    | 10-20   | Flexible | 12  | HAMD 17 | 19.99 | 8  | DSM-IV        | Europe                | Multi-<br>center | Primary<br>care                | Other/Unclea<br>r   | No      | Unclear |
|                                                       |                 |   |   | venlafaxine      | No  | 145 | 47<br>(14)     | *    | 75-150  | Flexible | 95  | HAMD 17 | 20.44 |    |               |                       |                  |                                |                     |         |         |
| Montgomery<br>2004b (CL3-<br>20098-030)               | 2001            | 2 | 2 | agomelatine      | Yes | 167 | 42.8<br>(13.5) | *    | 25-25   | Fixed    | 25  | MADRS   | 23.10 | 12 | DSM-IV        | Cross-<br>Continental | Multi-<br>center | Primary<br>care                | Outpatients<br>only | No      | No      |
|                                                       |                 |   |   | paroxetine       | No  | 168 | 42.1<br>(13.4) | *    | 20-20   | Fixed    | 20  | MADRS   | 23.00 |    |               |                       |                  |                                |                     |         |         |
| Moon 1994                                             | 1994            | 2 | 2 | sertraline       | Yes | 51  | 42 (*)         | 0.41 | 50-150  | Flexible | 64  | HAMD 17 | 23.9  | 6  | DSM-III       | Europe                | Multi-<br>center | Primary<br>care                | Outpatients<br>only | Yes     | Yes     |
|                                                       |                 |   |   | clomipramin<br>e | No  | 55  | 45 (*)         | 0.60 | 50-150  | Flexible | 61  | HAMD 17 | 22.7  |    |               |                       |                  |                                |                     |         |         |
| Moore 2005                                            | 2005            | 2 | 2 | escitalopram     | Yes | 142 | 44.1<br>(10.9) | *    | 20-20   | Fixed    | 20  | MADRS   | 36.30 | 8  | DSM-IV        | Europe                | Multi-<br>center | Both                           | Outpatients<br>only | No      | Unclear |
|                                                       |                 |   |   | citalopram       | No  | 152 | 46.2<br>(11.1) | *    | 40-40   | Fixed    | 40  | MADRS   | 35.70 |    |               |                       |                  |                                |                     |         |         |
| Munizza 2006                                          | 2006            | 2 | 2 | sertraline       | No  | 60  | 46.9<br>(10.6) | 0.70 | 50-100  | Flexible | 59  | HAMD 17 | 21.9  | 6  | DSM-IV        | Europe                | Multi-<br>center | Other/Unc<br>lear              | Outpatients<br>only | Unclear | Yes     |
|                                                       |                 |   |   | trazodone        | Yes | 62  | 45<br>(11.5)   | 0.60 | 150-450 | Flexible | 297 | HAMD 17 | 21.7  |    |               |                       |                  |                                |                     |         |         |
| Murasaki 1998                                         | 1998            | 2 | 2 | fluvoxamine      | Yes | 113 | 40.5<br>(*)    | *    | 50-150  | Flexible | 87  | HAMD 21 | 22.90 | 4  | DSM-<br>III-R | Asia                  | Multi-<br>center | Both                           | Both                | No      | Yes     |
|                                                       |                 |   |   | amitriptyline    | No  | 122 | 45.3<br>(*)    | *    | 50-150  | Flexible | 76  | HAMD 21 | 23.60 |    |               |                       |                  |                                |                     |         |         |
| Murasaki 2010a<br>(IQWIG22532,<br>Schoemaker<br>2002) | 2002            | 2 | 2 | mirtazapine      | Yes | 104 | 42<br>(12.1)   | 0.68 | 15-45   | Flexible | 23  | HAMD 17 | 25.10 | 6  | DSM-IV        | Europe                | Multi-<br>center | Both                           | Outpatients<br>only | No      | Yes     |
|                                                       |                 |   |   | fluvoxamine      | No  | 105 | 39.4<br>(12.7) | 0.64 | 50-150  | Flexible | 78  | HAMD 17 | 25.10 |    |               |                       |                  |                                |                     |         |         |

|                                                       |             |   |   |               |         |     |              |      |         |          |     |                  |       |    |           |               |               |                         |                  |         |         |  |
|-------------------------------------------------------|-------------|---|---|---------------|---------|-----|--------------|------|---------|----------|-----|------------------|-------|----|-----------|---------------|---------------|-------------------------|------------------|---------|---------|--|
| Murasaki 2010b (iQWIG9902, Schoemaker 2002)           | 2002        | 2 | 2 | mirtazapine   | Yes     | 101 | 40.7 (11.8)  | 0.50 | 15-45   | Flexible | *   | HAMD 17          | 22.90 | 6  | DSM-IV    | Asia          | Multi-center  | Both                    | Outpatients only | No      | Yes     |  |
|                                                       |             |   |   | fluvoxamine   | No      | 102 | 42.2 (12.9)  | 0.39 | 50-150  | Flexible | *   | HAMD 17          | 22.50 |    |           |               |               |                         |                  |         |         |  |
| Nemeroff 1995                                         | 1995        | 2 | 2 | fluvoxamine   | Yes     | 49  | 38.5 (*)     | *    | 50-150  | Flexible | 124 | HAMD 21          | 24.57 | 7  | DSM-III-R | North America | Multi-center  | Secondary/Tertiary care | Outpatients only | Yes     | Yes     |  |
|                                                       |             |   |   | sertraline    | No      | 48  | 41.2 (*)     | *    | 50-200  | Flexible | 137 | HAMD 21          | 23.15 |    |           |               |               |                         |                  |         |         |  |
| Nemeroff 2007                                         | 2007        | 3 | 3 | fluoxetine    | Unclear | 104 | 37.9 (11.5)  | *    | 20-60   | Flexible | 41  | HAMD 21          | 23.70 | 6  | DSM-IV    | North America | Multi-center  | Secondary/Tertiary care | Outpatients only | Yes     | Unclear |  |
|                                                       |             |   |   | venlafaxine   | Yes     | 102 | 40.1 (11.1)  | *    | 75-225  | Flexible | 142 | HAMD 21          | 23.50 |    |           |               |               |                         |                  |         |         |  |
|                                                       |             |   |   | placebo       | No      | 102 | 40.4 (11.7)  | *    | 0-0     | Flexible | 0   | HAMD 21          | 23.70 |    |           |               |               |                         |                  |         |         |  |
| Newhouse 2000                                         | 2000        | 2 | 2 | sertraline    | Yes     | 117 | 68 (5.3)     | *    | 50-100  | Flexible | 72  | HAMD 24          | 25.10 | 12 | DSM-III-R | North America | Multi-center  | Secondary/Tertiary care | Outpatients only | Yes     | Yes     |  |
|                                                       |             |   |   | fluoxetine    | No      | 119 | 67 (5.9)     | *    | 20-40   | Flexible | 29  | HAMD 24          | 25.00 |    |           |               |               |                         |                  |         |         |  |
| Noguera 1991                                          | 1991        | 2 | 2 | clomipramine  | No      | 60  | 46 (*)       | *    | 100-100 | Fixed    | 100 | HAMD unspecified | 24.60 | 6  | DSM-III   | Europe        | Multi-center  | Secondary/Tertiary care | Other/Unclear    | Yes     | Yes     |  |
|                                                       |             |   |   | fluoxetine    | Yes     | 60  | 46.3 (*)     | *    | 20-40   | Flexible | *   | HAMD unspecified | 24.30 |    |           |               |               |                         |                  |         |         |  |
| Ontiveros 1994 (MY-0144/BRL 29060/1/CPMS-135, PAR135) | 1994        | 2 | 2 | paroxetine    | No      | 60  | 43.1 (11)    | *    | 20-20   | Fixed    | 20  | HAMD 21          | 26.20 | 6  | DSM-III-R | North America | Multi-center  | Other/Unclear           | Outpatients only | Yes     | No      |  |
|                                                       |             |   |   | fluoxetine    | No      | 62  | 38.7 (10.7)  | *    | 20-20   | Fixed    | 20  | HAMD 21          | 26.40 |    |           |               |               |                         |                  |         |         |  |
| Ontiveros Sanchez 1998                                | 1998        | 2 | 2 | fluoxetine    | Yes     | 21  | 38.6 (11.5)  | 0.43 | 20-20   | Fixed    | 20  | HAMD 17          | 23.50 | 6  | DSM-III-R | South America | Single center | Secondary/Tertiary care | Outpatients only | Yes     | Unclear |  |
|                                                       |             |   |   | amitriptyline | No      | 21  | 36.5 (9.34)  | 0.62 | 150-250 | Flexible | 160 | HAMD 17          | 23.10 |    |           |               |               |                         |                  |         |         |  |
| Ottevanger 1995                                       | 1995        | 2 | 2 | fluvoxamine   | Yes     | 20  | 51.3 (15.39) | *    | 100-300 | Flexible | 204 | HAMD 17          | 26.40 | 4  | Feighner  | Europe        | Multi-center  | Other/Unclear           | Inpatients only  | Unclear | Yes     |  |
|                                                       |             |   |   | clomipramine  | No      | 20  | 47.05 (12.4) | *    | 50-150  | Flexible | 106 | HAMD 17          | 25.70 |    |           |               |               |                         |                  |         |         |  |
| Ou 2010                                               | 2010        | 2 | 2 | citalopram    | Unclear | 120 | 36.4 (12.3)  | 0.54 | 20-40   | Flexible | 28  | HAMD 17          | 22.9  | 6  | DSM-IV    | Asia          | Multi-center  | Secondary/Tertiary care | Both             | Unclear | Yes     |  |
|                                                       |             |   |   | escitalopram  | Unclear | 120 | 36.7 (12.5)  | 0.58 | 10-20   | Flexible | 14  | HAMD 17          | 23.4  |    |           |               |               |                         |                  |         |         |  |
| PAR 29060.308 (HP/81/74A)                             | unpublished | 2 | 2 | paroxetine    | Yes     | 10  | 43.3 (12.6)  | 0.60 | 30-30   | Fixed    | 30  | *                | *     | 6  | *         | Europe        | Single center | Secondary/Tertiary care | Inpatients only  | Yes     | Unclear |  |
|                                                       |             |   |   | amitriptyline | No      | 12  | 45.3 (12.5)  | 0.58 | 150-150 | Fixed    | 150 | *                | *     |    |           |               |               |                         |                  |         |         |  |
| PAR 29060.310 (HP 81/85A)                             | unpublished | 2 | 2 | paroxetine    | Yes     | 10  | 39.1 (11.9)  | 0.67 | 30-30   | Fixed    | 30  | *                | *     | 7  | *         | Europe        | Single center | Other/Unclear           | Other/Unclear    | Yes     | Unclear |  |

|                                                              |                 |   |   |                  |     |     |                 |      |         |          |     |                     |       |    |               |                       |                  |                                |                     |         |         |
|--------------------------------------------------------------|-----------------|---|---|------------------|-----|-----|-----------------|------|---------|----------|-----|---------------------|-------|----|---------------|-----------------------|------------------|--------------------------------|---------------------|---------|---------|
|                                                              |                 |   |   | amitriptyline    | No  | 13  | 43.7<br>(10.2)  | 0.50 | 150-150 | Fixed    | 150 | *                   | *     |    |               |                       |                  |                                |                     |         |         |
| PAR 29060.314<br>(HP 82/134)                                 | unpublis<br>hed | 2 | 2 | paroxetine       | Yes | 10  | 46.8<br>(13.1)  | 0.30 | 30-30   | Fixed    | 30  | *                   | *     | 6  | *             | Europe                | Single<br>center | Other/Unc<br>lear              | Other/Unclea<br>r   | Yes     | Unclear |
|                                                              |                 |   |   | amitriptyline    | No  | 8   | 41.8<br>(11.7)  | 0.75 | 150-150 | Fixed    | 150 | *                   | *     |    |               |                       |                  |                                |                     |         |         |
| PAR 29060.316<br>(HP/82/47A)                                 | unpublis<br>hed | 2 | 2 | paroxetine       | Yes | 9   | 47.2<br>(14.8)  | 0.78 | 30-30   | Fixed    | 30  | *                   | *     | 7  | RDC           | Europe                | Multi-<br>center | Secondary<br>/Tertiary<br>care | Inpatients<br>only  | Yes     | Unclear |
|                                                              |                 |   |   | amitriptyline    | No  | 8   | 41<br>(11.7)    | 1.00 | 150-150 | Fixed    | 150 | *                   | *     |    |               |                       |                  |                                |                     |         |         |
| PAR 29060.318<br>(HP/82/64A)                                 | unpublis<br>hed | 2 | 2 | paroxetine       | Yes | 9   | 47.3<br>(10.1)  | 1.00 | 30-30   | Fixed    | 30  | *                   | *     | 7  | *             | Europe                | Single<br>center | Secondary<br>Tertiary<br>care  | Inpatients<br>only  | Yes     | Unclear |
|                                                              |                 |   |   | amitriptyline    | No  | 12  | 50.1<br>(8.2)   | 1.00 | 150-150 | Fixed    | 150 | *                   | *     |    |               |                       |                  |                                |                     |         |         |
| PAR 29060/281                                                | unpublis<br>hed | 2 | 2 | paroxetine       | Yes | 82  | 39.5<br>(13.1)  | 0.78 | 30-30   | Fixed    | 30  | HAMD 21             | 27.80 | 6  | Feighne<br>r  | Europe                | Single<br>center | Primary<br>care                | Other/Unclea<br>r   | Yes     | Unclear |
|                                                              |                 |   |   | amitriptyline    | No  | 80  | 38.1<br>(13.1)  | 0.75 | 75-150  | Flexible | *   | HAMD 21             | 26.60 |    |               |                       |                  |                                |                     |         |         |
| PAR MDUK 032                                                 | unpublis<br>hed | 2 | 2 | paroxetine       | Yes | 29  | 42.6<br>(11.7)  | *    | 20-30   | Flexible | *   | HAMD 17             | 24.00 | 6  | DSM-III       | *                     | Multi-<br>center | Primary<br>care                | Outpatients<br>only | Unclear | Unclear |
|                                                              |                 |   |   | amitriptyline    | No  | 30  | 46.2<br>(11.8)  | *    | 100-150 | Flexible | *   | HAMD 17             | 23.20 |    |               |                       |                  |                                |                     |         |         |
| Patris 1996<br>(Study 91301 -<br>FDA)                        | 1996            | 2 | 2 | fluoxetine       | No  | 184 | 43 (*)          | *    | 20-20   | Fixed    | 20  | MADRS               | 29.40 | 8  | DSM-<br>III-R | Europe                | Multi-<br>center | Primary<br>care                | Outpatients<br>only | Yes     | Unclear |
|                                                              |                 |   |   | citalopram       | Yes | 173 | 44 (*)          | *    | 20-20   | Fixed    | 20  | MADRS               | 29.70 |    |               |                       |                  |                                |                     |         |         |
| Pelicier 1993<br>(PAR<br>MDED/29060/II<br>I/86/1728M291<br>) | 1993            | 2 | 2 | clomipramin<br>e | No  | 42  | 70.2<br>(8.9)   |      | 60-60   | Fixed    | 60  | MADRS               | 30.00 | 5  | Feighne<br>r  | Europe                | Multi-<br>center | Other/Unc<br>lear              | Outpatients<br>only | Unclear | Unclear |
|                                                              |                 |   |   | paroxetine       | Yes | 41  | 71.1<br>(8)     |      | 20-20   | Fixed    | 20  | MADRS               | 29.50 |    |               |                       |                  |                                |                     |         |         |
| Perahia 2008a<br>(HMBU)<br>(NCT00071695)                     | 2008            | 2 | 2 | duloxetine       | Yes | 166 | 45.42<br>(13)   | 0.72 | 60-60   | Fixed    | 60  | HAMD 17             | 23.10 | 6  | DSM-IV        | Cross-<br>Continental | Multi-<br>center | Other/Unc<br>lear              | Outpatients<br>only | Unclear | Unclear |
|                                                              |                 |   |   | venlafaxine      | No  | 166 | 42.62<br>(13.1) | 0.69 | 150-150 | Fixed    | 150 | HAMD 17             | 23.10 |    |               |                       |                  |                                |                     |         |         |
| Perahia 2008b<br>(HMCQ,<br>NCT00067912)                      | 2008            | 3 | 3 | duloxetine       | Yes | 164 | 43.07<br>(12.6) | 0.67 | 60-60   | Fixed    | 60  | HAMD 17             | 22.21 | 6  | DSM-IV        | Cross-<br>Continental | Multi-<br>center | Other/Unc<br>lear              | Outpatients<br>only | Unclear | Unclear |
|                                                              |                 |   |   | venlafaxine      | No  | 169 | 42.46<br>(12.4) | 0.68 | 75-75   | Fixed    | 75  | HAMD 17             | 22.51 |    |               |                       |                  |                                |                     |         |         |
|                                                              |                 |   |   | venlafaxine      | No  | 171 | 40.64<br>(11.4) | 0.62 | 150-150 | Fixed    | 150 | HAMD 17             | 22.24 |    |               |                       |                  |                                |                     |         |         |
| Preskorn 1991                                                | 1991            | 2 | 2 | fluoxetine       | Yes | 30  | *               | *    | 20-60   | Flexible | *   | HAMD<br>unspecified | 23.8  | 6  | DSM-III       | North<br>America      | Multi-<br>center | Other/Unc<br>lear              | Outpatients<br>only | Yes     | Yes     |
|                                                              |                 |   |   | amitriptyline    | No  | 31  | *               | *    | 50-200  | Flexible | *   | HAMD<br>unspecified | 23.5  |    |               |                       |                  |                                |                     |         |         |
| Quera-Salva<br>2010 (CL3-<br>20098-056)                      | 2010            | 2 | 2 | agomelatine      | Yes | 71  | 41.3<br>(12.4)  | *    | 25-50   | Flexible | *   | HAMD 17             | 26.10 | 25 | DSM-IV        | Cross-<br>Continental | Multi-<br>center | Primary<br>care                | Outpatients<br>only | No      | No      |
|                                                              |                 |   |   | escitalopram     | No  | 67  | 41.4<br>(10.7)  | *    | 10-20   | Flexible | *   | HAMD 17             | 26.10 |    |               |                       |                  |                                |                     |         |         |

|                                                           |      |   |   |               |         |     |             |      |         |               |     |         |       |    |                       |                   |               |                         |                  |         |         |
|-----------------------------------------------------------|------|---|---|---------------|---------|-----|-------------|------|---------|---------------|-----|---------|-------|----|-----------------------|-------------------|---------------|-------------------------|------------------|---------|---------|
| Rapaport 1996                                             | 1996 | 2 | 2 | fluvoxamine   | Yes     | 51  | 40 (*)      | *    | 100-150 | Flexible      | 102 | HAMD 21 | 25.20 | 7  | DSM-III-R             | North America     | Multi-center  | Other/Unclear           | Outpatients only | Yes     | Yes     |
|                                                           |      |   |   | fluoxetine    | No      | 49  | 38.6 (*)    | *    | 20-80   | Flexible      | 34  | HAMD 21 | 25.60 |    |                       |                   |               |                         |                  |         |         |
| Ravindran 1997<br>(MY-1055/BRL-029060/1/CPMS-245 PAR 245) | 1997 | 2 | 2 | paroxetine    | Yes     | 513 | 43.3 (13)   | 0.73 | 20-40   | Flexible      | *   | MADRS   | 29.7  | 12 | Other operationalized | Cross-Continental | Multi-center  | Primary care            | Other/Unclear    | Yes     | Yes     |
|                                                           |      |   |   | clomipramine  | No      | 506 | 42 (12.5)   | 0.73 | 75-150  | Flexible      | *   | MADRS   | 29.1  |    |                       |                   |               |                         |                  |         |         |
| Remick 1994                                               | 1994 | 2 | 2 | amitriptyline | No      | 17  | 41 (*)      | *    | 50-300  | Flexible      | 135 | HAMD 17 | 23.50 | 7  | DSM-III               | North America     | Multi-center  | Secondary/Tertiary care | Outpatients only | Yes     | Unclear |
|                                                           |      |   |   | fluvoxamine   | Yes     | 16  | 41.7 (*)    | *    | 50-300  | Flexible      | 175 | HAMD 17 | 23.80 |    |                       |                   |               |                         |                  |         |         |
| Ropert 1989                                               | 1989 | 2 | 2 | fluoxetine    | Unclear | 71  | 42.7 (11)   | 0.60 | 20-20   | Fixed         | 20  | HAMD 21 | 23.00 | 6  | DSM-III               | Europe            | Multi-center  | Other/Unclear           | Outpatients only | Unclear | Unclear |
|                                                           |      |   |   | clomipramine  | No      | 72  | 44.8 (12.6) | 0.69 | 75-75   | Fixed         | 75  | HAMD 21 | 23.00 |    |                       |                   |               |                         |                  |         |         |
| Rossini 2005                                              | 2005 | 2 | 2 | fluvoxamine   | Unclear | 40  | 67.8 (*)    | *    | 200-200 | Fixed         | 200 | HAMD 21 | 31.23 | 7  | DSM-IV                | Europe            | Single center | Secondary/Tertiary care | Inpatients only  | Unclear | Yes     |
|                                                           |      |   |   | sertraline    | Unclear | 48  | 68.2 (*)    | *    | 150-150 | Fixed         | 150 | HAMD 21 | 29.23 |    |                       |                   |               |                         |                  |         |         |
| Rouillon 1991<br>(Limosin 2006, 029060/1/CPMS 069 1991)   | 1991 | 2 | 2 | paroxetine    | Yes     | 45  | 71.8 (7.4)  | 0.87 | 20-50   | Other/Unclear | *   | HAMD 21 | 27    | 6  | DSM-III               | Europe            | Multi-center  | Secondary/Tertiary care | Inpatients only  | Unclear | Unclear |
|                                                           |      |   |   | clomipramine  | No      | 47  | 70.8 (6.5)  | 0.91 | 50-150  | Other/Unclear | *   | HAMD 21 | 27.6  |    |                       |                   |               |                         |                  |         |         |
| Samuelian 1998                                            | 1998 | 2 | 2 | venlafaxine   | Yes     | 52  | 47 (12)     | *    | 100-150 | Flexible      | 105 | HAMD 21 | 27.80 | 6  | DSM-III-R             | Europe            | Multi-center  | Other/Unclear           | Outpatients only | Yes     | Yes     |
|                                                           |      |   |   | clomipramine  | No      | 50  | 47 (11)     | *    | 100-150 | Flexible      | 105 | HAMD 21 | 27.80 |    |                       |                   |               |                         |                  |         |         |
| Sauer 2003                                                | 2003 | 2 | 2 | venlafaxine   | Yes     | 79  | 48.5 (10.8) | *    | 75-150  | Flexible      | 85  | HAMD 21 | 23.60 | 6  | ICD-10                | Europe            | Multi-center  | Both                    | Outpatients only | Unclear | No      |
|                                                           |      |   |   | amitriptyline | No      | 77  | 46 (10.9)   | *    | 75-150  | Flexible      | 84  | HAMD 21 | 23.64 |    |                       |                   |               |                         |                  |         |         |
| Schatzberg 2002 (003-901)                                 | 2002 | 2 | 2 | mirtazapine   | Yes     | 128 | 71.7 (5.7)  | *    | 15-45   | Flexible      | 34  | HAMD 17 | 22.20 | 8  | DSM-IV                | North America     | Multi-center  | Other/Unclear           | Outpatients only | Unclear | Yes     |
|                                                           |      |   |   | paroxetine    | No      | 126 | 72 (5.1)    | *    | 20-40   | Flexible      | 34  | HAMD 17 | 22.40 |    |                       |                   |               |                         |                  |         |         |
| Schoene 1993<br>(Geretsegger 1994 MY1021/BRC)             | 1993 | 2 | 2 | paroxetine    | Yes     | 54  | 74.3 (6)    | *    | 20-50   | Flexible      | *   | HAMD 21 | 29.00 | 6  | DSM-III-R             | Europe            | Multi-center  | Other/Unclear           | Outpatients only | Yes     | Unclear |
|                                                           |      |   |   | fluoxetine    | No      | 52  | 73.7 (6.4)  | *    | 20-80   | Flexible      | *   | HAMD 21 | 27.90 |    |                       |                   |               |                         |                  |         |         |
| Schwartz 2002 (iQWIG)                                     | 2002 | 2 | 2 | reboxetine    | Unclear | 80  | 41.9 (*)    | 0.71 | 8-10    | Flexible      | *   | HAMD 17 | 28.60 | 8  | DSM-IV                | Cross-Continental | Multi-center  | Other/Unclear           | Other/Unclear    | Unclear | Unclear |
|                                                           |      |   |   | venlafaxine   | Unclear | 87  | 42.2 (*)    | 0.67 | 225-375 | Flexible      | *   | HAMD 17 | 28.80 |    |                       |                   |               |                         |                  |         |         |

|                                                          |                 |   |   |                  |         |     |                      |      |         |          |     |                     |       |    |               |                       |                  |                                |                     |         |         |  |
|----------------------------------------------------------|-----------------|---|---|------------------|---------|-----|----------------------|------|---------|----------|-----|---------------------|-------|----|---------------|-----------------------|------------------|--------------------------------|---------------------|---------|---------|--|
| SCT-MD-09                                                | unpublis<br>hed | 2 | 2 | escitalopram     | Yes     | 16  | 35.9<br>(10.6)       | *    | 10-20   | Fixed    | *   | *                   | *     | 5  | DSM-IV        | North<br>America      | Single<br>center | Other/Unc<br>lear              | Outpatients<br>only | Unclear | Unclear |  |
|                                                          |                 |   |   | fluoxetine       | No      | 14  | 41.4<br>(9.8)        | *    | 20-40   | Fixed    | *   | *                   | *     |    |               |                       |                  |                                |                     |         |         |  |
| Sechter 1999                                             | 1999            | 2 | 2 | sertraline       | Yes     | 118 | 43.4<br>(12.3)       | *    | 50-150  | Flexible | 77  | HAMD 17             | 24.50 | 8  | DSM-<br>III-R | Europe                | Multi-<br>center | Secondary<br>/Tertiary<br>care | Outpatients<br>only | No      | Unclear |  |
|                                                          |                 |   |   | fluoxetine       | No      | 120 | 42.5<br>(11.1)       | *    | 20-60   | Flexible | 34  | HAMD 17             | 24.90 |    |               |                       |                  |                                |                     |         |         |  |
| Sechter 2004                                             | 2004            | 2 | 2 | milnacipran      | Yes     | 149 | 44.8<br>(11.6)       | *    | 100-100 | Fixed    | 100 | HAMD 17             | 23.70 | 6  | DSM-IV        | Europe                | Multi-<br>center | Secondary<br>/Tertiary<br>care | Outpatients<br>only | Unclear | Unclear |  |
|                                                          |                 |   |   | paroxetine       | No      | 153 | 42.8<br>(11.2)       | *    | 20-20   | Fixed    | 20  | HAMD 17             | 23.40 |    |               |                       |                  |                                |                     |         |         |  |
| SER-CHN-1                                                | unpublis<br>hed | 2 | 2 | paroxetine       | Yes     | 113 | 40.14<br>(13.2)      | 0.55 | 20-30   | Flexible | *   | HAMD<br>unspecified | 27.10 | 6  | DSM-<br>III-R | Asia                  | Multi-<br>center | Other/Unc<br>lear              | Other/Unclea<br>r   | Unclear | Unclear |  |
|                                                          |                 |   |   | amitriptyline    | No      | 118 | 40.54<br>(13.45<br>) | 0.53 | 150-150 | Fixed    | 150 | HAMD<br>unspecified | 26.60 |    |               |                       |                  |                                |                     |         |         |  |
| Shelton 2006<br>(NCT00179283)                            | 2006            | 2 | 2 | venlafaxine      | Unclear | 78  | 37.2<br>(11.6)       | *    | 75-225  | Flexible | *   | HAMD 17             | 22.40 | 8  | DSM-IV        | North<br>America      | Multi-<br>center | Secondary<br>/Tertiary<br>care | Outpatients<br>only | Unclear | No      |  |
|                                                          |                 |   |   | sertraline       | Yes     | 82  | 41.2<br>(12)         | *    | 50-150  | Flexible | *   | HAMD 17             | 22.10 |    |               |                       |                  |                                |                     |         |         |  |
| Shu 2014 (CL3-<br>20098-052,<br>ChiCTR-TRC-<br>11001668) | 2014            | 2 | 2 | agomelatine      | Yes     | 314 | 39.2<br>(12.8)       | 0.68 | 25-50   | Flexible | *   | HAMD 17             | 26.80 | 8  | DSM-IV        | Asia                  | Multi-<br>center | Primary<br>care                | Outpatients<br>only | No      | No      |  |
|                                                          |                 |   |   | fluoxetine       | No      | 314 | 38.9<br>(12.6)       | 0.71 | 20-40   | Flexible | *   | HAMD 17             | 26.80 |    |               |                       |                  |                                |                     |         |         |  |
| Sir 2005                                                 | 2005            | 2 | 2 | venlafaxine      | No      | 84  | 36.8<br>(12.4)       | *    | 75-225  | Flexible | 161 | HAMD 17             | 23.50 | 8  | DSM-IV        | Cross-<br>Continental | Multi-<br>center | Secondary<br>/Tertiary<br>care | Outpatients<br>only | Unclear | Unclear |  |
|                                                          |                 |   |   | sertraline       | Yes     | 79  | 37.3<br>(13.5)       | *    | 50-150  | Flexible | 105 | HAMD 17             | 23.40 |    |               |                       |                  |                                |                     |         |         |  |
| Smeraldi 1998                                            | 1998            | 3 | 3 | venlafaxine      | Unclear | 55  | 71 (6)               | *    | 75-150  | Flexible | *   | *                   | *     | 6  | DSM-<br>III-R | Europe                | Multi-<br>center | Other/Unc<br>lear              | Both                | Yes     | Unclear |  |
|                                                          |                 |   |   | clomipramin<br>e | Unclear | 58  | 71 (6)               | *    | 50-100  | Flexible | *   | *                   | *     |    |               |                       |                  |                                |                     |         |         |  |
|                                                          |                 |   |   | trazodone        | Unclear | 57  | 71 (6)               | *    | 150-300 | Flexible | *   | *                   | *     |    |               |                       |                  |                                |                     |         |         |  |
| Staner 1995<br>(063)                                     | 1995            | 2 | 2 | paroxetine       | Yes     | 21  | 41.7<br>(10.8)       | *    | 30-30   | Fixed    | 30  | HAMD 21             | 26.00 | 5  | RDC           | Europe                | Single<br>center | Secondary<br>/Tertiary<br>care | Inpatients<br>only  | Yes     | Yes     |  |
|                                                          |                 |   |   | amitriptyline    | No      | 19  | 42.5<br>(11.7)       | *    | 150-150 | Fixed    | 150 | HAMD 21             | 24.00 |    |               |                       |                  |                                |                     |         |         |  |
| Studie032<br>(M2020/0032)                                | unpublis<br>hed | 2 | 2 | reboxetine       | Yes     | 43  | 40.65<br>(14.6)      | 0.63 | 8-10    | Flexible | 8   | HAMD 21             | 27.23 | 8  | DSM-IV        | Asia                  | Multi-<br>center | Secondary<br>/Tertiary<br>care | Both                | Yes     | Yes     |  |
|                                                          |                 |   |   | fluoxetine       | No      | 42  | 35.98<br>(12.7)      | 0.62 | 20-40   | Flexible | 27  | HAMD 21             | 28.33 |    |               |                       |                  |                                |                     |         |         |  |
| Study 043                                                | 2006            | 2 | 2 | reboxetine       | Yes     | 183 | 42.8<br>(13.3)       | 0.69 | 8-10    | Flexible | 9   | HAMD 21             | 27.40 | 24 | DSM-IV        | Europe                | Multi-<br>center | Other/Unc<br>lear              | Outpatients<br>only | Unclear | Yes     |  |

|                                                      |      |   |   |               |     |     |                |      |         |          |     |         |       |    |           |               |              |                         |                  |         |         |
|------------------------------------------------------|------|---|---|---------------|-----|-----|----------------|------|---------|----------|-----|---------|-------|----|-----------|---------------|--------------|-------------------------|------------------|---------|---------|
|                                                      |      |   |   | citalopram    | No  | 176 | 41.5<br>(12)   | 0.60 | 20-40   | Flexible | 28  | HAMD 21 | 27.40 |    |           |               |              |                         |                  |         |         |
| Szegedi 2006                                         | 2006 | 2 | 2 | mirtazapine   | Yes | 130 | *              | *    | 45-45   | Fixed    | 45  | HAMD 17 | 24.60 | 6  | DSM-IV    | Europe        | Multi-center | Other/Unclear           | Outpatients only | No      | Unclear |
|                                                      |      |   |   | venlafaxine   | No  | 128 | *              | *    | 225-225 | Fixed    | 225 | HAMD 17 | 24.90 |    |           |               |              |                         |                  |         |         |
| Thase 2006<br>(WELL 100368)                          | 2006 | 2 | 2 | bupropion     | Yes | 171 | 37.1<br>(12.3) | *    | 150-450 | Flexible | 300 | HAMD 17 | 24.90 | 12 | DSM-IV    | North America | Multi-center | Secondary/Tertiary care | Outpatients only | Unclear | Unclear |
|                                                      |      |   |   | venlafaxine   | No  | 177 | 37.4<br>(11.6) | *    | 75-225  | Flexible | 150 | HAMD 17 | 24.10 |    |           |               |              |                         |                  |         |         |
| Tignol 1993<br>(29060/087)                           | 1993 | 2 | 2 | paroxetine    | Yes | 89  | 43<br>(11.6)   | *    | 20-20   | Fixed    | 20  | MADRS   | 30.74 | 6  | DSM-III-R | Europe        | Multi-center | Secondary/Tertiary care | Inpatients only  | Yes     | Unclear |
|                                                      |      |   |   | fluoxetine    | No  | 87  | 45<br>(13.2)   | *    | 20-20   | Fixed    | 20  | MADRS   | 31.60 |    |           |               |              |                         |                  |         |         |
| Timmerman 1993 (Study 89422 - FDA and Haffmans 1996) | 1993 | 2 | 2 | fluvoxamine   | No  | 109 | *              | *    | 100-200 | Flexible | *   | HAMD 17 | 24.50 | 6  | DSM-III-R | Europe        | Multi-center | Secondary/Tertiary care | Outpatients only | Unclear | Yes     |
|                                                      |      |   |   | citalopram    | Yes | 108 | *              | *    | 20-40   | Flexible | *   | HAMD 17 | 24.70 |    |           |               |              |                         |                  |         |         |
| Tsutsui 2000                                         | 2000 | 2 | 2 | paroxetine    | Yes | 116 | 39.1<br>(13.9) | *    | 10-40   | Flexible | 32  | HAMD 17 | 23.60 | 6  | DSM-IV    | Asia          | Multi-center | Both                    | Both             | No      | Yes     |
|                                                      |      |   |   | trazodone     | No  | 109 | 38.5<br>(12.7) | *    | 75-200  | Flexible | 154 | HAMD 17 | 24.40 |    |           |               |              |                         |                  |         |         |
| Tylee 1997                                           | 1997 | 2 | 2 | fluoxetine    | No  | 170 | 45.5<br>(14.3) | 0.75 | 20-20   | Fixed    | 20  | HAMD 17 | 22.50 | 12 | DSM-IV    | Europe        | Multi-center | Primary care            | Outpatients only | Unclear | Unclear |
|                                                      |      |   |   | venlafaxine   | Yes | 171 | 43.5<br>(14)   | 0.68 | 75-75   | Fixed    | 75  | HAMD 17 | 22.40 |    |           |               |              |                         |                  |         |         |
| Tzanakaki 2000                                       | 2000 | 2 | 2 | fluoxetine    | No  | 54  | 49<br>(10)     | *    | 20-60   | Flexible | *   | HAMD 21 | 27.10 | 6  | DSM-IV    | Europe        | Multi-center | Secondary/Tertiary care | Both             | Yes     | Unclear |
|                                                      |      |   |   | venlafaxine   | Yes | 55  | 47<br>(11)     | *    | 75-225  | Flexible | *   | HAMD 21 | 27.80 |    |           |               |              |                         |                  |         |         |
| Upward 1988                                          | 1988 | 2 | 2 | fluoxetine    | Yes | 13  | 40<br>(10.6)   | 0.55 | 60-80   | Flexible | 75  | *       | *     | 4  | *         | Europe        | Unclear      | Other/Unclear           | Outpatients only | Yes     | Yes     |
|                                                      |      |   |   | amitriptyline | No  | 14  | 45<br>(13.2)   | 0.58 | 150-200 | Flexible | 183 | *       | *     |    |           |               |              |                         |                  |         |         |
| VanMoffaert 1995a                                    | 1995 | 2 | 2 | sertraline    | Yes | 83  | 46.1<br>(*)    | *    | 50-100  | Flexible | *   | HAMD 17 | 24.50 | 8  | DSM-III-R | Europe        | Multi-center | Secondary/Tertiary care | Other/Unclear    | Yes     | Yes     |
|                                                      |      |   |   | fluoxetine    | No  | 82  | 48.4<br>(*)    | *    | 20-40   | Flexible | *   | HAMD 17 | 23.20 |    |           |               |              |                         |                  |         |         |
| VanMoffaert 1995b                                    | 1995 | 2 | 2 | mirtazapine   | Yes | 100 | 46.1<br>(10.8) | 0.69 | 24-72   | Flexible | *   | HAMD 17 | 29.2  | 6  | DSM-III   | Europe        | Multi-center | Secondary/Tertiary care | Inpatients only  | Unclear | Yes     |
|                                                      |      |   |   | trazodone     | No  | 100 | 46.3<br>(12.6) | 0.71 | 150-450 | Flexible | *   | HAMD 17 | 27.5  |    |           |               |              |                         |                  |         |         |
| Ventura 2007<br>(SCT-MD-18)                          | 2007 | 2 | 2 | escitalopram  | Yes | 107 | 40.6<br>(13.7) | *    | 10-10   | Fixed    | 10  | HAMD 24 | 26.80 | 8  | DSM-IV    | North America | Multi-center | Other/Unclear           | Outpatients only | Unclear | Unclear |
|                                                      |      |   |   | sertraline    | No  | 108 | 38.1<br>(11.5) | *    | 50-200  | Flexible | *   | HAMD 24 | 26.80 |    |           |               |              |                         |                  |         |         |

|                                             |             |   |   |               |         |     |             |      |         |          |     |                  |       |    |           |                   |              |                         |                  |         |         |
|---------------------------------------------|-------------|---|---|---------------|---------|-----|-------------|------|---------|----------|-----|------------------|-------|----|-----------|-------------------|--------------|-------------------------|------------------|---------|---------|
| Versiani 1999                               | 1999        | 2 | 2 | fluoxetine    | Yes     | 77  | 41.3 (*)    | 0.76 | 20-20   | Fixed    | 20  | HAMD 21          | 28.40 | 8  | DSM-IV    | South America     | Multi-center | Other/Unclear           | Other/Unclear    | Yes     | No      |
|                                             |             |   |   | amitriptyline | No      | 80  | 41.3 (*)    | 0.76 | 50-250  | Flexible | 138 | HAMD 21          | 27.80 |    |           |                   |              |                         |                  |         |         |
| Versiani 2005                               | 2005        | 2 | 2 | mirtazapine   | Yes     | 145 | 43 (*)      | *    | 15-60   | Flexible | *   | HAMD 17          | 29.00 | 8  | DSM-IV    | Cross-Continental | Multi-center | Other/Unclear           | Other/Unclear    | Yes     | No      |
|                                             |             |   |   | fluoxetine    | No      | 149 | 47 (*)      | *    | 20-40   | Flexible | *   | HAMD 17          | 28.00 |    |           |                   |              |                         |                  |         |         |
| Wade 2003 (E-1721)                          | 2003        | 2 | 2 | mirtazapine   | Yes     | 99  | 40 (14.3)   | *    | 15-45   | Flexible | 35  | HAMD 17          | 23.80 | 12 | DSM-IV    | Europe            | Multi-center | Primary care            | Outpatients only | No      | No      |
|                                             |             |   |   | paroxetine    | No      | 98  | 40 (11.7)   | *    | 10-30   | Flexible | 24  | HAMD 17          | 24.40 |    |           |                   |              |                         |                  |         |         |
| Wade 2007 (Study 10990)                     | 2007        | 2 | 2 | escitalopram  | Yes     | 144 | 43.3 (11.6) | *    | 20-20   | Fixed    | 20  | HAMD 17          | 22.70 | 8  | DSM-IV    | Cross-Continental | Multi-center | Primary care            | Outpatients only | No      | Unclear |
|                                             |             |   |   | duloxetine    | No      | 151 | 44.5 (11)   | *    | 60-60   | Fixed    | 60  | HAMD 17          | 22.70 |    |           |                   |              |                         |                  |         |         |
| Wang 2015 (NCT01571453, KCT0000432, 13926A) | 2015        | 2 | 2 | vortioxetine  | Yes     | 213 | 39.6 (12.4) | 0.58 | 10-10   | Fixed    | 10  | MADRS            | 32.30 | 8  | DSM-IV    | Asia              | Multi-center | Secondary/Tertiary care | Both             | Unclear | Yes     |
|                                             |             |   |   | venlafaxine   | No      | 230 | 40.7 (12.3) | 0.62 | 150-150 | Fixed    | 150 | MADRS            | 32.30 |    |           |                   |              |                         |                  |         |         |
| Weisler 1994                                | 1994        | 2 | 2 | bupropion     | Yes     | 63  | 40.2 (*)    | *    | 225-450 | Flexible | 345 | HAMD 21          | 25.80 | 6  | DSM-III-R | North America     | Multi-center | Secondary/Tertiary care | Outpatients only | Yes     | Unclear |
|                                             |             |   |   | trazodone     | No      | 61  | 40.8 (*)    | *    | 150-400 | Flexible | 207 | HAMD 21          | 24.90 |    |           |                   |              |                         |                  |         |         |
| WELL AK140016                               | unpublished | 2 | 2 | bupropion     | Yes     | 69  | 37.6 (10.6) | *    | 300-300 | Fixed    | 300 | HAMD 17          | 21.90 | 8  | DSM-IV    | North America     | Multi-center | Other/Unclear           | Other/Unclear    | Unclear | Unclear |
|                                             |             |   |   | paroxetine    | No      | 71  | 37 (10.8)   | *    | 20-20   | Fixed    | 20  | HAMD 17          | 22.30 |    |           |                   |              |                         |                  |         |         |
| Wheatley 1998                               | 1998        | 2 | 2 | mirtazapine   | Yes     | 66  | 47.2 (15.3) | *    | 15-60   | Flexible | 40  | HAMD 17          | 26.00 | 6  | DSM-III   | Europe            | Multi-center | Other/Unclear           | Both             | Yes     | No      |
|                                             |             |   |   | fluoxetine    | No      | 67  | 47.5 (14.8) | *    | 20-40   | Flexible | 24  | HAMD 17          | 26.10 |    |           |                   |              |                         |                  |         |         |
| Winokur 2003                                | 2003        | 2 | 2 | mirtazapine   | Yes     | 8   | 40.9 (*)    | *    | 15-45   | Flexible | *   | HAMD 21          | 25.60 | 8  | DSM-IV    | North America     | Unclear      | Other/Unclear           | Other/Unclear    | No      | No      |
|                                             |             |   |   | fluoxetine    | No      | 12  | 43.5 (*)    | *    | 20-40   | Flexible | *   | HAMD 21          | 26.70 |    |           |                   |              |                         |                  |         |         |
| Yang 2003                                   | 2003        | 2 | 2 | milnacipran   | Yes     | 27  | 43.5 (10.4) | *    | 50-100  | Flexible | *   | HAMD 17          | 25.20 | 6  | DSM-IV    | Asia              | Multi-center | Secondary/Tertiary care | Outpatients only | Unclear | Unclear |
|                                             |             |   |   | sertraline    | No      | 26  | 42 (8.9)    | *    | 50-100  | Flexible | *   | HAMD 17          | 23.20 |    |           |                   |              |                         |                  |         |         |
| Yevtushenko 2007                            | 2007        | 2 | 3 | escitalopram  | Yes     | 109 | 35.2 (6.5)  | 0.61 | 10-10   | Fixed    | 10  | MADRS            | 25.67 | 6  | DSM-IV    | Europe            | Multi-center | Secondary/Tertiary care | Outpatients only | Unclear | Yes     |
|                                             |             |   |   | citalopram    | No      | 110 | 35.1 (6.5)  | 0.56 | 20-20   | Fixed    | 20  | MADRS            | 35.70 |    |           |                   |              |                         |                  |         |         |
| Young 1987                                  | 1987        | 2 | 2 | fluoxetine    | Unclear | 32  | 46.1 (*)    | 0.68 | 40-80   | Flexible | 73  | HAMD unspecified | 44.00 | 6  | RDC       | Europe            | Unclear      | Secondary/Tertiary care | Outpatients only | Unclear | Yes     |
|                                             |             |   |   | amitriptyline | Unclear | 32  | 46.6 (*)    | 0.68 | 50-150  | Flexible | 122 | HAMD unspecified | 48.10 |    |           |                   |              |                         |                  |         |         |

|                                                |                 |   |   |               |     |     |                |   |       |                   |    |         |       |    |               |                  |                  |                   |                   |         |         |
|------------------------------------------------|-----------------|---|---|---------------|-----|-----|----------------|---|-------|-------------------|----|---------|-------|----|---------------|------------------|------------------|-------------------|-------------------|---------|---------|
| Zivkov 1995<br>(Organon<br>85146,<br>FDA85146) | 1997            | 2 | 2 | mirtazapine   | Yes | 103 | 48.5<br>(10.6) | * | *     | Other/U<br>nclear | *  | HAMD 17 | 27.30 | 6  | DSM-III       | North<br>America | Multi-<br>center | Other/Unc<br>lear | Other/Unclea<br>r | Unclear | Unclear |
|                                                |                 |   |   | amitriptyline | No  | 104 | 47.7<br>(12.4) | * | *     | Other/U<br>nclear | *  | HAMD 17 | 26.20 |    |               |                  |                  |                   |                   |         |         |
| 0600A-654                                      | unpublis<br>hed | 2 | 2 | venlafaxine   | Yes | 131 | *              | * | *-150 | Flexible          | *  | MADRS   | *     | 12 | DSM-IV        | *                | Unclear          | Other/Unc<br>lear | Other/Unclea<br>r | Unclear | Unclear |
|                                                |                 |   |   | fluoxetine    | No  | 135 | *              | * | *-40  | Flexible          | *  | MADRS   | *     |    |               |                  |                  |                   |                   |         |         |
| 29060/356                                      | unpublis<br>hed | 2 | 2 | paroxetine    | Yes | 68  | 42.2<br>(1.5)  | * | 20-20 | Fixed             | 20 | HAMD 17 | 24.60 | 8  | DSM-<br>III-R | Australia        | Multi-<br>center | Other/Unc<br>lear | Both              | Unclear | Unclear |
|                                                |                 |   |   | fluoxetine    | No  | 70  | 40.6<br>(1.5)  | * | 20-20 | Fixed             | 20 | HAMD 17 | 23.80 |    |               |                  |                  |                   |                   |         |         |



## 5 Risk of bias table of included studies

*eTable 2. Risk of bias table of included studies.*

| StudyID              | Sequence_generation  | Allocation_concealment | Blinding_participant  | Blinding_therapist    | Blinding_assessor     | Selective_reporting_bias | Attrition_bias       |
|----------------------|----------------------|------------------------|-----------------------|-----------------------|-----------------------|--------------------------|----------------------|
| 1. Aberg-Wisted 2000 | Unclear risk of bias | Unclear risk of bias   | Stated but not tested | Stated but not tested | Stated but not tested | Unclear risk of bias     | Low risk of bias     |
| 2. Aguglia 1993      | Unclear risk of bias | Unclear risk of bias   | Stated but not tested | Stated but not tested | Stated but not tested | Low risk of bias         | High risk of bias    |
| 3. Allard 2004       | Unclear risk of bias | Unclear risk of bias   | Stated but not tested | Stated but not tested | Stated but not tested | Unclear risk of bias     | Unclear risk of bias |
| 4. Altamura 1989b    | Unclear risk of bias | Unclear risk of bias   | Stated but not tested | Stated but not tested | Unclear risk of bias  | Low risk of bias         | Low risk of bias     |
| 5. Alves 1999        | Low risk of bias     | Low risk of bias       | Stated but not tested | Stated but not tested | Unclear risk of bias  | Low risk of bias         | Unclear risk of bias |
| 6. Amini 2005        | Unclear risk of bias | Unclear risk of bias   | Stated but not tested | Stated but not tested | Unclear risk of bias  | Low risk of bias         | Low risk of bias     |
| 7. Andersen 1986     | Unclear risk of bias | Unclear risk of bias   | Stated but not tested | Stated but not tested | Unclear risk of bias  | Low risk of bias         | Low risk of bias     |
| 8. Anseau 1989a      | Unclear risk of bias | Unclear risk of bias   | Stated but not tested | Stated but not tested | Unclear risk of bias  | Unclear risk of bias     | High risk of bias    |
| 9. Anseau 1989b      | Unclear risk of bias | Unclear risk of bias   | Stated but not tested | Stated but not tested | Unclear risk of bias  | Low risk of bias         | Low risk of bias     |
| 10. Anseau 1991      | Unclear risk of bias | Unclear risk of bias   | Stated but not tested | Stated but not tested | Unclear risk of bias  | Low risk of bias         | High risk of bias    |
| 11. Anseau 1994a     | Unclear risk of bias | Unclear risk of bias   | Stated but not tested | Stated but not tested | Unclear risk of bias  | Low risk of bias         | Unclear risk of bias |
| 12. Anseau 1994b     | Low risk of bias     | Unclear risk of bias   | Stated but not tested | Stated but not tested | Unclear risk of bias  | Low risk of bias         | Unclear risk of bias |
| 13. Armitage 1997    | Unclear risk of bias | Unclear risk of bias   | Stated but not tested | Stated but not tested | Unclear risk of bias  | Low risk of bias         | Unclear risk of bias |
| 14. Baldwin 1996     | Unclear risk of bias | Unclear risk of bias   | Stated but not tested | Stated but not tested | Unclear risk of bias  | Low risk of bias         | Unclear risk of bias |
| 15. Baldwin 2006a    | Unclear risk of bias | Unclear risk of bias   | Stated but not tested | Stated but not tested | Unclear risk of bias  | Low risk of bias         | High risk of bias    |
| 16. Baldwin 2006b    | Low risk of bias     | Low risk of bias       | Stated but not tested | Stated but not tested | Unclear risk of bias  | Low risk of bias         | Low risk of bias     |
| 17. Battegay 1985    | Unclear risk of bias | Unclear risk of bias   | Stated but not tested | Stated but not tested | Unclear risk of bias  | Unclear risk of bias     | High risk of bias    |
| 18. Beasley 1991     | Unclear risk of bias | Unclear risk of bias   | Stated but not tested | Stated but not tested | Unclear risk of bias  | Low risk of bias         | Unclear risk of bias |
| 19. Behnke 2003      | Unclear risk of bias | Unclear risk of bias   | Stated but not tested | Stated but not tested | Unclear risk of bias  | Low risk of bias         | Unclear risk of bias |
| 20. Benkert 2000     | Unclear risk of bias | Unclear risk of bias   | Stated but not tested | Stated but not tested | Unclear risk of bias  | Low risk of bias         | Unclear risk of bias |
| 21. Benkert 2006     | Unclear risk of bias | Unclear risk of bias   | Stated but not tested | Stated but not tested | Stated but not tested | Low risk of bias         | Unclear risk of bias |
| 22. Bennie 1995      | Low risk of bias     | Unclear risk of bias   | Stated but not tested | Stated but not tested | Unclear risk of bias  | Unclear risk of bias     | Low risk of bias     |
| 23. Berlanga 1997    | Unclear risk of bias | Unclear risk of bias   | Stated but not tested | Stated but not tested | Unclear risk of bias  | Low risk of bias         | High risk of bias    |
| 24. Bersani 1994     | Unclear risk of bias | Unclear risk of bias   | Stated but not tested | Stated but not tested | Unclear risk of bias  | Low risk of bias         | Low risk of bias     |
| 25. Bielski 2004     | Low risk of bias     | Unclear risk of bias   | Stated but not tested | Stated but not tested | Unclear risk of bias  | Low risk of bias         | Unclear risk of bias |
| 26. Bignamini 1992   | Unclear risk of bias | Unclear risk of bias   | Stated but not tested | Stated but not tested | Unclear risk of bias  | Low risk of bias         | Low risk of bias     |

|     |                   |                      |                      |                       |                       |                       |                      |                      |
|-----|-------------------|----------------------|----------------------|-----------------------|-----------------------|-----------------------|----------------------|----------------------|
| 27. | Blacker 1988      | Unclear risk of bias | Unclear risk of bias | Stated but not tested | Stated but not tested | Unclear risk of bias  | Low risk of bias     | Unclear risk of bias |
| 28. | Bosc 1997b        | Unclear risk of bias | Unclear risk of bias | Stated but not tested | Stated but not tested | Unclear risk of bias  | Low risk of bias     | Unclear risk of bias |
| 29. | Bougerol 1997     | Unclear risk of bias | Unclear risk of bias | Stated but not tested | Stated but not tested | Unclear risk of bias  | Low risk of bias     | Unclear risk of bias |
| 30. | Boulenger 2006    | Low risk of bias     | Unclear risk of bias | Stated but not tested | Stated but not tested | Unclear risk of bias  | Unclear risk of bias | Low risk of bias     |
| 31. | Caligiuri 2003    | Unclear risk of bias | Unclear risk of bias | Stated but not tested | Stated but not tested | Unclear risk of bias  | Unclear risk of bias | Unclear risk of bias |
| 32. | Casabona 2002     | Unclear risk of bias | Unclear risk of bias | Stated but not tested | Stated but not tested | Unclear risk of bias  | Low risk of bias     | Low risk of bias     |
| 33. | Cassano 2002      | Unclear risk of bias | Unclear risk of bias | Stated but not tested | Stated but not tested | Stated but not tested | Unclear risk of bias | Unclear risk of bias |
| 34. | Chang 2015        | Unclear risk of bias | Unclear risk of bias | Stated but not tested | Stated but not tested | Stated but not tested | Unclear risk of bias | Unclear risk of bias |
| 35. | Chouinard 1983a   | Unclear risk of bias | Unclear risk of bias | Stated but not tested | Stated but not tested | Unclear risk of bias  | Unclear risk of bias | High risk of bias    |
| 36. | Chouinard 1985    | Unclear risk of bias | Unclear risk of bias | Stated but not tested | Stated but not tested | Unclear risk of bias  | Low risk of bias     | Low risk of bias     |
| 37. | Chouinard 1999    | Unclear risk of bias | Unclear risk of bias | Stated but not tested | Stated but not tested | Stated but not tested | Low risk of bias     | Unclear risk of bias |
| 38. | Christiansen 1996 | Low risk of bias     | Unclear risk of bias | Stated but not tested | Stated but not tested | Unclear risk of bias  | Low risk of bias     | Unclear risk of bias |
| 39. | CL3-20098-036     | Low risk of bias     | Low risk of bias     | Stated but not tested | Stated but not tested | Unclear risk of bias  | Low risk of bias     | Low risk of bias     |
| 40. | CL3-20098-048     | Low risk of bias     | Low risk of bias     | Stated but not tested | Stated but not tested | Unclear risk of bias  | Low risk of bias     | Unclear risk of bias |
| 41. | CL3-20098-062     | Low risk of bias     | Low risk of bias     | Stated but not tested | Stated but not tested | Unclear risk of bias  | Low risk of bias     | Unclear risk of bias |
| 42. | Clerc 1994        | Unclear risk of bias | Unclear risk of bias | Stated but not tested | Stated but not tested | Unclear risk of bias  | Low risk of bias     | High risk of bias    |
| 43. | Clerc 2001        | Unclear risk of bias | Unclear risk of bias | Stated but not tested | Stated but not tested | Unclear risk of bias  | Low risk of bias     | Unclear risk of bias |
| 44. | Cohn1990          | Unclear risk of bias | Unclear risk of bias | Stated but not tested | Stated but not tested | Unclear risk of bias  | Low risk of bias     | Unclear risk of bias |
| 45. | Colonna 2005      | Low risk of bias     | Low risk of bias     | Stated but not tested | Stated but not tested | Unclear risk of bias  | Unclear risk of bias | Low risk of bias     |
| 46. | Corruble 2013     | Low risk of bias     | Low risk of bias     | Stated but not tested | Stated but not tested | Unclear risk of bias  | Low risk of bias     | Low risk of bias     |
| 47. | Costaesilva 1998  | Unclear risk of bias | Unclear risk of bias | Stated but not tested | Stated but not tested | Unclear risk of bias  | Low risk of bias     | Low risk of bias     |
| 48. | Dalery 2003       | Unclear risk of bias | Unclear risk of bias | Stated but not tested | Stated but not tested | Unclear risk of bias  | Unclear risk of bias | Unclear risk of bias |
| 49. | Debonnel 2000     | Unclear risk of bias | Unclear risk of bias | Stated but not tested | Stated but not tested | Stated but not tested | Low risk of bias     | High risk of bias    |
| 50. | Debus 1988        | Unclear risk of bias | Unclear risk of bias | Stated but not tested | Stated but not tested | Unclear risk of bias  | Low risk of bias     | High risk of bias    |
| 51. | Demyttenaere 1998 | Unclear risk of bias | Unclear risk of bias | Stated but not tested | Stated but not tested | Unclear risk of bias  | Low risk of bias     | High risk of bias    |
| 52. | DeRonchi 1998     | Unclear risk of bias | Unclear risk of bias | Stated but not tested | Stated but not tested | Unclear risk of bias  | Low risk of bias     | Unclear risk of bias |
| 53. | Deushle 2003      | Unclear risk of bias | Unclear risk of bias | Stated but not tested | Stated but not tested | Unclear risk of bias  | High risk of bias    | High risk of bias    |
| 54. | DeWilde 1983a     | Unclear risk of bias | Unclear risk of bias | Stated but not tested | Stated but not tested | Unclear risk of bias  | Low risk of bias     | Low risk of bias     |
| 55. | DeWilde 1993      | Unclear risk of bias | Unclear risk of bias | Stated but not tested | Stated but not tested | Stated but not tested | Low risk of bias     | Unclear risk of bias |
| 56. | Dierick 1996      | Unclear risk of bias | Unclear risk of bias | Stated but not tested | Stated but not tested | Unclear risk of bias  | Low risk of bias     | Unclear risk of bias |

|     |                  |                      |                      |                       |                       |                       |                      |                      |
|-----|------------------|----------------------|----------------------|-----------------------|-----------------------|-----------------------|----------------------|----------------------|
| 57. | DUAG 1990        | Unclear risk of bias | Unclear risk of bias | Stated but not tested | Stated but not tested | Unclear risk of bias  | Low risk of bias     | High risk of bias    |
| 58. | E-1569           | Unclear risk of bias | Unclear risk of bias | Stated but not tested | Stated but not tested | Stated but not tested | Low risk of bias     | Low risk of bias     |
| 59. | Ekselius 1997    | Unclear risk of bias | Unclear risk of bias | Stated but not tested | Stated but not tested | Stated but not tested | Unclear risk of bias | Low risk of bias     |
| 60. | Falk 1989        | Unclear risk of bias | Unclear risk of bias | Stated but not tested | Stated but not tested | Unclear risk of bias  | Low risk of bias     | High risk of bias    |
| 61. | Fava 2002        | Unclear risk of bias | Unclear risk of bias | Stated but not tested | Stated but not tested | Unclear risk of bias  | Low risk of bias     | Unclear risk of bias |
| 62. | Fawcett 1989     | Unclear risk of bias | Unclear risk of bias | Stated but not tested | Stated but not tested | Unclear risk of bias  | Low risk of bias     | High risk of bias    |
| 63. | Feiger 1996      | Unclear risk of bias | Unclear risk of bias | Stated but not tested | Stated but not tested | Unclear risk of bias  | Low risk of bias     | Unclear risk of bias |
| 64. | Feighner 1991    | Unclear risk of bias | Unclear risk of bias | Stated but not tested | Stated but not tested | Unclear risk of bias  | Unclear risk of bias | Unclear risk of bias |
| 65. | Fudge 1990       | Unclear risk of bias | Unclear risk of bias | Stated but not tested | Stated but not tested | Unclear risk of bias  | Unclear risk of bias | High risk of bias    |
| 66. | Gagiano 1993     | Unclear risk of bias | Unclear risk of bias | Stated but not tested | Stated but not tested | Stated but not tested | Low risk of bias     | Low risk of bias     |
| 67. | Gentil 2000      | Unclear risk of bias | Unclear risk of bias | Stated but not tested | Stated but not tested | Unclear risk of bias  | Low risk of bias     | Low risk of bias     |
| 68. | Geretsegger 1995 | Unclear risk of bias | Unclear risk of bias | Stated but not tested | Stated but not tested | Unclear risk of bias  | Low risk of bias     | Unclear risk of bias |
| 69. | Gillin 1997      | Unclear risk of bias | Unclear risk of bias | Stated but not tested | Stated but not tested | Unclear risk of bias  | Low risk of bias     | Low risk of bias     |
| 70. | Ginestet 1989    | Unclear risk of bias | Unclear risk of bias | Stated but not tested | Stated but not tested | Unclear risk of bias  | Unclear risk of bias | Unclear risk of bias |
| 71. | Guelfi 1998      | Low risk of bias     | Unclear risk of bias | Stated but not tested | Stated but not tested | Stated but not tested | Low risk of bias     | Unclear risk of bias |
| 72. | Guillibert 1989  | Unclear risk of bias | Unclear risk of bias | Stated but not tested | Stated but not tested | Unclear risk of bias  | Low risk of bias     | Unclear risk of bias |
| 73. | Hackett 1998     | Unclear risk of bias | Unclear risk of bias | Stated but not tested | Stated but not tested | Unclear risk of bias  | Unclear risk of bias | High risk of bias    |
| 74. | Hale 2010        | Low risk of bias     | Low risk of bias     | Stated but not tested | Stated but not tested | Unclear risk of bias  | Low risk of bias     | Low risk of bias     |
| 75. | Hao 2014         | Unclear risk of bias | Unclear risk of bias | Stated but not tested | Stated but not tested | Stated but not tested | Unclear risk of bias | Unclear risk of bias |
| 76. | Harris 1991      | Unclear risk of bias | Unclear risk of bias | Stated but not tested | Stated but not tested | Unclear risk of bias  | Low risk of bias     | Unclear risk of bias |
| 77. | Heller 2009      | Unclear risk of bias | Unclear risk of bias | Stated but not tested | Stated but not tested | Unclear risk of bias  | Unclear risk of bias | High risk of bias    |
| 78. | Hicks 2002       | Unclear risk of bias | Unclear risk of bias | Stated but not tested | Stated but not tested | Unclear risk of bias  | Low risk of bias     | Low risk of bias     |
| 79. | Hong 2003        | Unclear risk of bias | Unclear risk of bias | Stated but not tested | Stated but not tested | Unclear risk of bias  | Low risk of bias     | High risk of bias    |
| 80. | Hosseini 2015    | Unclear risk of bias | Unclear risk of bias | Stated but not tested | Stated but not tested | Unclear risk of bias  | Low risk of bias     | High risk of bias    |
| 81. | Hsu 2011         | Unclear risk of bias | Unclear risk of bias | Stated but not tested | Stated but not tested | Unclear risk of bias  | Unclear risk of bias | Unclear risk of bias |
| 82. | Hu 2009          | Unclear risk of bias | Unclear risk of bias | Stated but not tested | Stated but not tested | Unclear risk of bias  | Unclear risk of bias | Unclear risk of bias |
| 83. | Hutchinson 1992  | Unclear risk of bias | Unclear risk of bias | Stated but not tested | Stated but not tested | Unclear risk of bias  | Low risk of bias     | High risk of bias    |
| 84. | Jiang 2009       | Unclear risk of bias | Unclear risk of bias | Stated but not tested | Stated but not tested | Stated but not tested | Low risk of bias     | Low risk of bias     |
| 85. | Judd 1993        | Unclear risk of bias | Unclear risk of bias | Stated but not tested | Stated but not tested | Unclear risk of bias  | Low risk of bias     | Unclear risk of bias |
| 86. | Kamijima 2013    | Unclear risk of bias | Unclear risk of bias | Stated but not tested | Stated but not tested | Stated but not tested | Low risk of bias     | Low risk of bias     |

|      |                             |                      |                      |                       |                       |                       |                      |                      |
|------|-----------------------------|----------------------|----------------------|-----------------------|-----------------------|-----------------------|----------------------|----------------------|
| 87.  | Kasper 2005b                | Unclear risk of bias | Unclear risk of bias | Stated but not tested | Stated but not tested | Unclear risk of bias  | Low risk of bias     | Low risk of bias     |
| 88.  | Keegan 1991                 | Unclear risk of bias | Unclear risk of bias | Stated but not tested | Stated but not tested | Unclear risk of bias  | Low risk of bias     | Low risk of bias     |
| 89.  | Keller 2007                 | Unclear risk of bias | Unclear risk of bias | Stated but not tested | Stated but not tested | Stated but not tested | Unclear risk of bias | Unclear risk of bias |
| 90.  | Kennedy 2005                | Unclear risk of bias | Unclear risk of bias | Stated but not tested | Stated but not tested | Unclear risk of bias  | Low risk of bias     | High risk of bias    |
| 91.  | Kerkhofs 1990               | Unclear risk of bias | Unclear risk of bias | Stated but not tested | Stated but not tested | Unclear risk of bias  | Unclear risk of bias | Unclear risk of bias |
| 92.  | Khan 2007                   | Unclear risk of bias | Unclear risk of bias | Stated but not tested | Stated but not tested | Unclear risk of bias  | Low risk of bias     | High risk of bias    |
| 93.  | Kiev 1997                   | Unclear risk of bias | Unclear risk of bias | Stated but not tested | Stated but not tested | Unclear risk of bias  | Low risk of bias     | Unclear risk of bias |
| 94.  | Kuhs 1989                   | Unclear risk of bias | Unclear risk of bias | Stated but not tested | Stated but not tested | Unclear risk of bias  | Unclear risk of bias | Unclear risk of bias |
| 95.  | Laakman 1988                | Unclear risk of bias | Unclear risk of bias | Stated but not tested | Stated but not tested | Unclear risk of bias  | Unclear risk of bias | Unclear risk of bias |
| 96.  | Lalit 2004                  | Unclear risk of bias | Unclear risk of bias | Stated but not tested | Stated but not tested | Unclear risk of bias  | Low risk of bias     | High risk of bias    |
| 97.  | Lapierre 1980               | Unclear risk of bias | Unclear risk of bias | Stated but not tested | Stated but not tested | Unclear risk of bias  | High risk of bias    | Low risk of bias     |
| 98.  | Lee 2007                    | Unclear risk of bias | Unclear risk of bias | Stated but not tested | Stated but not tested | Unclear risk of bias  | Low risk of bias     | Unclear risk of bias |
| 99.  | Leinonen 1997               | Low risk of bias     | Unclear risk of bias | Stated but not tested | Stated but not tested | Unclear risk of bias  | Low risk of bias     | Unclear risk of bias |
| 100. | Leinonen 1999               | Low risk of bias     | Low risk of bias     | Stated but not tested | Stated but not tested | Unclear risk of bias  | Low risk of bias     | Low risk of bias     |
| 101. | Lemoine 2007                | Low risk of bias     | Low risk of bias     | Stated but not tested | Stated but not tested | Unclear risk of bias  | Low risk of bias     | High risk of bias    |
| 102. | Lepine 2000                 | Unclear risk of bias | Unclear risk of bias | Stated but not tested | Stated but not tested | Unclear risk of bias  | Low risk of bias     | Low risk of bias     |
| 103. | Li 2006                     | Low risk of bias     | Unclear risk of bias | Stated but not tested | Stated but not tested | Unclear risk of bias  | Low risk of bias     | Unclear risk of bias |
| 104. | Li 2010                     | Unclear risk of bias | Unclear risk of bias | Stated but not tested | Stated but not tested | Unclear risk of bias  | Unclear risk of bias | Low risk of bias     |
| 105. | Lv 2013                     | Unclear risk of bias | Unclear risk of bias | Stated but not tested | Stated but not tested | Unclear risk of bias  | Unclear risk of bias | Unclear risk of bias |
| 106. | Manna 1989                  | Unclear risk of bias | Unclear risk of bias | Stated but not tested | Stated but not tested | Unclear risk of bias  | Unclear risk of bias | Unclear risk of bias |
| 107. | Mao 2008                    | Unclear risk of bias | Unclear risk of bias | Stated but not tested | Stated but not tested | Unclear risk of bias  | Low risk of bias     | Low risk of bias     |
| 108. | Marchesi 1998               | Unclear risk of bias | Unclear risk of bias | Stated but not tested | Stated but not tested | Unclear risk of bias  | Low risk of bias     | Low risk of bias     |
| 109. | McPartlin 1998              | Unclear risk of bias | Unclear risk of bias | Stated but not tested | Stated but not tested | Unclear risk of bias  | Low risk of bias     | Unclear risk of bias |
| 110. | MDF/29060/III/070/88/<br>MC | Unclear risk of bias | Unclear risk of bias | Stated but not tested | Stated but not tested | Unclear risk of bias  | Low risk of bias     | Unclear risk of bias |
| 111. | Mehtonen 2000               | Unclear risk of bias | Unclear risk of bias | Stated but not tested | Stated but not tested | Stated but not tested | Low risk of bias     | Low risk of bias     |
| 112. | Miura 2000                  | Unclear risk of bias | Unclear risk of bias | Stated but not tested | Stated but not tested | Stated but not tested | Low risk of bias     | Unclear risk of bias |
| 113. | Moller 1993                 | Unclear risk of bias | Unclear risk of bias | Stated but not tested | Stated but not tested | Unclear risk of bias  | Low risk of bias     | Unclear risk of bias |
| 114. | Moller 1998                 | Unclear risk of bias | Unclear risk of bias | Stated but not tested | Stated but not tested | Unclear risk of bias  | Low risk of bias     | Low risk of bias     |
| 115. | Moller 2000                 | Unclear risk of bias | Unclear risk of bias | Stated but not tested | Stated but not tested | Unclear risk of bias  | Low risk of bias     | Low risk of bias     |
| 116. | Montgomery 2004a            | Unclear risk of bias | Unclear risk of bias | Stated but not tested | Stated but not tested | Stated but not tested | Low risk of bias     | Low risk of bias     |

|      |                       |                      |                      |                       |                       |                       |                      |                      |
|------|-----------------------|----------------------|----------------------|-----------------------|-----------------------|-----------------------|----------------------|----------------------|
| 117. | Montgomery 2004b      | Low risk of bias     | Low risk of bias     | Stated but not tested | Stated but not tested | Unclear risk of bias  | Low risk of bias     | Unclear risk of bias |
| 118. | Moon 1994             | Unclear risk of bias | Unclear risk of bias | Stated but not tested | Stated but not tested | Unclear risk of bias  | Low risk of bias     | Unclear risk of bias |
| 119. | Moore 2005            | Low risk of bias     | Unclear risk of bias | Stated but not tested | Stated but not tested | Stated but not tested | Low risk of bias     | Low risk of bias     |
| 120. | Munizza 2006          | Low risk of bias     | Unclear risk of bias | Stated but not tested | Stated but not tested | Unclear risk of bias  | Low risk of bias     | Low risk of bias     |
| 121. | Murasaki 1998         | Unclear risk of bias | Unclear risk of bias | Stated but not tested | Stated but not tested | Stated but not tested | Low risk of bias     | Unclear risk of bias |
| 122. | Murasaki 2010a        | Unclear risk of bias | Unclear risk of bias | Stated but not tested | Stated but not tested | Stated but not tested | Low risk of bias     | Low risk of bias     |
| 123. | Murasaki 2010b        | Unclear risk of bias | Unclear risk of bias | Stated but not tested | Stated but not tested | Stated but not tested | Low risk of bias     | Unclear risk of bias |
| 124. | Nemeroff 1995         | Unclear risk of bias | Unclear risk of bias | Stated but not tested | Stated but not tested | Unclear risk of bias  | Low risk of bias     | High risk of bias    |
| 125. | Newhouse 2000         | Unclear risk of bias | Unclear risk of bias | Stated but not tested | Stated but not tested | Unclear risk of bias  | Low risk of bias     | Unclear risk of bias |
| 126. | Noguera 1991          | Unclear risk of bias | Unclear risk of bias | Stated but not tested | Stated but not tested | Unclear risk of bias  | Low risk of bias     | Unclear risk of bias |
| 127. | Ontiveros 1994        | Unclear risk of bias | Unclear risk of bias | Stated but not tested | Stated but not tested | Unclear risk of bias  | Low risk of bias     | Low risk of bias     |
| 128. | OntiverosSanchez 1998 | Unclear risk of bias | Unclear risk of bias | Stated but not tested | Stated but not tested | Unclear risk of bias  | Low risk of bias     | High risk of bias    |
| 129. | Ottevanger 1995       | Unclear risk of bias | Unclear risk of bias | Stated but not tested | Stated but not tested | Unclear risk of bias  | Low risk of bias     | Low risk of bias     |
| 130. | Ou 2010               | Low risk of bias     | Low risk of bias     | Stated but not tested | Stated but not tested | Unclear risk of bias  | Low risk of bias     | Low risk of bias     |
| 131. | PAR 29060.308         | Unclear risk of bias | Unclear risk of bias | Stated but not tested | Stated but not tested | Unclear risk of bias  | Unclear risk of bias | Low risk of bias     |
| 132. | PAR 29060.310         | Unclear risk of bias | Unclear risk of bias | Stated but not tested | Stated but not tested | Unclear risk of bias  | Low risk of bias     | Unclear risk of bias |
| 133. | PAR 29060.314         | Unclear risk of bias | Unclear risk of bias | Stated but not tested | Stated but not tested | Unclear risk of bias  | Unclear risk of bias | High risk of bias    |
| 134. | PAR 29060.316         | Unclear risk of bias | Unclear risk of bias | Stated but not tested | Stated but not tested | Unclear risk of bias  | Unclear risk of bias | Unclear risk of bias |
| 135. | PAR 29060.318         | Unclear risk of bias | Unclear risk of bias | Stated but not tested | Stated but not tested | Unclear risk of bias  | Low risk of bias     | Low risk of bias     |
| 136. | PAR 29060/281         | Unclear risk of bias | Unclear risk of bias | Stated but not tested | Stated but not tested | Unclear risk of bias  | Low risk of bias     | High risk of bias    |
| 137. | PAR MDUK 032          | Unclear risk of bias | Unclear risk of bias | Stated but not tested | Stated but not tested | Unclear risk of bias  | Low risk of bias     | Unclear risk of bias |
| 138. | Patris 1996           | Unclear risk of bias | Unclear risk of bias | Stated but not tested | Stated but not tested | Unclear risk of bias  | Low risk of bias     | Low risk of bias     |
| 139. | Pelicier 1993         | Unclear risk of bias | Unclear risk of bias | Stated but not tested | Stated but not tested | Unclear risk of bias  | Low risk of bias     | Unclear risk of bias |
| 140. | Perahia 2008a         | Unclear risk of bias | Unclear risk of bias | Stated but not tested | Stated but not tested | Unclear risk of bias  | Low risk of bias     | Low risk of bias     |
| 141. | Perahia 2008b         | Unclear risk of bias | Unclear risk of bias | Stated but not tested | Stated but not tested | Unclear risk of bias  | Low risk of bias     | Unclear risk of bias |
| 142. | Preskorn 1991         | Unclear risk of bias | Unclear risk of bias | Stated but not tested | Stated but not tested | Unclear risk of bias  | Low risk of bias     | High risk of bias    |
| 143. | Quera-Salva 2010      | Low risk of bias     | Low risk of bias     | Stated but not tested | Stated but not tested | Unclear risk of bias  | Low risk of bias     | Low risk of bias     |
| 144. | Rapaport 1996         | Unclear risk of bias | Unclear risk of bias | Stated but not tested | Stated but not tested | Unclear risk of bias  | Low risk of bias     | Low risk of bias     |
| 145. | Ravindran 1997        | Unclear risk of bias | Unclear risk of bias | Stated but not tested | Stated but not tested | Unclear risk of bias  | Low risk of bias     | Unclear risk of bias |
| 146. | Remick 1994           | Unclear risk of bias | Unclear risk of bias | Stated but not tested | Stated but not tested | Unclear risk of bias  | Low risk of bias     | High risk of bias    |

|      |                   |                      |                      |                       |                       |                       |                      |                      |
|------|-------------------|----------------------|----------------------|-----------------------|-----------------------|-----------------------|----------------------|----------------------|
| 147. | Roport 1989       | Unclear risk of bias | Unclear risk of bias | Stated but not tested | Stated but not tested | Unclear risk of bias  | Low risk of bias     | High risk of bias    |
| 148. | Rossini 2005      | Low risk of bias     | Unclear risk of bias | Stated but not tested | Stated but not tested | Stated but not tested | Low risk of bias     | Low risk of bias     |
| 149. | Rouillon 1991     | Unclear risk of bias | Unclear risk of bias | Stated but not tested | Stated but not tested | Unclear risk of bias  | Low risk of bias     | Unclear risk of bias |
| 150. | Samuelian 1998    | Unclear risk of bias | Unclear risk of bias | Stated but not tested | Stated but not tested | Unclear risk of bias  | Low risk of bias     | Unclear risk of bias |
| 151. | Sauer 2003        | Unclear risk of bias | Unclear risk of bias | Stated but not tested | Stated but not tested | Unclear risk of bias  | Low risk of bias     | Unclear risk of bias |
| 152. | Schatzberg 2002   | Low risk of bias     | Unclear risk of bias | Low risk of bias      | Stated but not tested | Unclear risk of bias  | Low risk of bias     | Unclear risk of bias |
| 153. | Schoene 1993      | Unclear risk of bias | Unclear risk of bias | Stated but not tested | Stated but not tested | Stated but not tested | Low risk of bias     | Low risk of bias     |
| 154. | Schwartz 2002     | Unclear risk of bias | Unclear risk of bias | Stated but not tested | Stated but not tested | Unclear risk of bias  | Low risk of bias     | Unclear risk of bias |
| 155. | SCT-MD-09         | Unclear risk of bias | Unclear risk of bias | Stated but not tested | Stated but not tested | Unclear risk of bias  | Unclear risk of bias | Low risk of bias     |
| 156. | Sechter 1999      | Unclear risk of bias | Unclear risk of bias | Stated but not tested | Stated but not tested | Unclear risk of bias  | Unclear risk of bias | Unclear risk of bias |
| 157. | Sechter 2004      | Unclear risk of bias | Unclear risk of bias | Stated but not tested | Stated but not tested | Unclear risk of bias  | Low risk of bias     | Unclear risk of bias |
| 158. | SER-CHN-1         | Unclear risk of bias | Unclear risk of bias | Stated but not tested | Stated but not tested | Unclear risk of bias  | Low risk of bias     | Low risk of bias     |
| 159. | Shelton 2006      | Unclear risk of bias | Unclear risk of bias | Stated but not tested | Stated but not tested | Unclear risk of bias  | Low risk of bias     | Low risk of bias     |
| 160. | Shu 2014          | Low risk of bias     | Low risk of bias     | Stated but not tested | Stated but not tested | Unclear risk of bias  | Low risk of bias     | Unclear risk of bias |
| 161. | Sir 2005          | Unclear risk of bias | Unclear risk of bias | Stated but not tested | Stated but not tested | Unclear risk of bias  | Low risk of bias     | High risk of bias    |
| 162. | Smeraldi 1998     | Unclear risk of bias | Unclear risk of bias | Stated but not tested | Stated but not tested | Unclear risk of bias  | Unclear risk of bias | Unclear risk of bias |
| 163. | Staner 1995       | Unclear risk of bias | Unclear risk of bias | Stated but not tested | Stated but not tested | Unclear risk of bias  | Low risk of bias     | Unclear risk of bias |
| 164. | Studie032         | Low risk of bias     | Unclear risk of bias | Stated but not tested | Stated but not tested | Unclear risk of bias  | Low risk of bias     | Unclear risk of bias |
| 165. | Study 043         | Unclear risk of bias | Unclear risk of bias | Stated but not tested | Stated but not tested | Unclear risk of bias  | Unclear risk of bias | Unclear risk of bias |
| 166. | Szegedi 2006      | Low risk of bias     | Unclear risk of bias | Stated but not tested | Stated but not tested | Unclear risk of bias  | Low risk of bias     | Unclear risk of bias |
| 167. | Thase 2006        | Unclear risk of bias | Unclear risk of bias | Stated but not tested | Stated but not tested | Unclear risk of bias  | Low risk of bias     | Unclear risk of bias |
| 168. | Tignol 1993       | Unclear risk of bias | Unclear risk of bias | Stated but not tested | Stated but not tested | Stated but not tested | Low risk of bias     | Unclear risk of bias |
| 169. | Timmerman 1993    | Low risk of bias     | Unclear risk of bias | Stated but not tested | Stated but not tested | Unclear risk of bias  | Low risk of bias     | Unclear risk of bias |
| 170. | Tsutsui 2000      | Unclear risk of bias | Unclear risk of bias | Stated but not tested | Stated but not tested | Stated but not tested | Low risk of bias     | Unclear risk of bias |
| 171. | Tylee 1997        | Unclear risk of bias | Unclear risk of bias | Stated but not tested | Stated but not tested | Unclear risk of bias  | Low risk of bias     | Unclear risk of bias |
| 172. | Tzanakaki 2000    | Unclear risk of bias | Unclear risk of bias | Stated but not tested | Stated but not tested | Unclear risk of bias  | Low risk of bias     | Unclear risk of bias |
| 173. | Upward 1988       | Unclear risk of bias | Unclear risk of bias | Stated but not tested | Stated but not tested | Unclear risk of bias  | Unclear risk of bias | Low risk of bias     |
| 174. | vanMoffaert 1995a | Unclear risk of bias | Unclear risk of bias | Stated but not tested | Stated but not tested | Unclear risk of bias  | Unclear risk of bias | Low risk of bias     |
| 175. | vanMoffaert 1995b | Unclear risk of bias | Unclear risk of bias | Stated but not tested | Stated but not tested | Unclear risk of bias  | Low risk of bias     | Unclear risk of bias |
| 176. | Ventura 2007      | Unclear risk of bias | Unclear risk of bias | Stated but not tested | Stated but not tested | Unclear risk of bias  | Low risk of bias     | Low risk of bias     |

|      |                         |                      |                      |                       |                       |                       |                      |                      |
|------|-------------------------|----------------------|----------------------|-----------------------|-----------------------|-----------------------|----------------------|----------------------|
| 177. | <b>Versiani 1999</b>    | Unclear risk of bias | Unclear risk of bias | Stated but not tested | Stated but not tested | Unclear risk of bias  | Low risk of bias     | Low risk of bias     |
| 178. | <b>Versiani 2005</b>    | Unclear risk of bias | Unclear risk of bias | Stated but not tested | Stated but not tested | Stated but not tested | Low risk of bias     | Low risk of bias     |
| 179. | <b>Wade 2003</b>        | Unclear risk of bias | Low risk of bias     | Stated but not tested | Stated but not tested | Stated but not tested | Unclear risk of bias | Unclear risk of bias |
| 180. | <b>Wade 2007</b>        | Low risk of bias     | Low risk of bias     | Stated but not tested | Stated but not tested | Unclear risk of bias  | Low risk of bias     | Unclear risk of bias |
| 181. | <b>Wang 2015</b>        | Low risk of bias     | Low risk of bias     | Stated but not tested | Stated but not tested | Stated but not tested | Low risk of bias     | Unclear risk of bias |
| 182. | <b>Weisler 1994</b>     | Unclear risk of bias | Unclear risk of bias | Stated but not tested | Stated but not tested | Unclear risk of bias  | Low risk of bias     | Unclear risk of bias |
| 183. | <b>WELL AK140016</b>    | Unclear risk of bias | Unclear risk of bias | Stated but not tested | Stated but not tested | Unclear risk of bias  | Low risk of bias     | Unclear risk of bias |
| 184. | <b>Wheatley 1998</b>    | Low risk of bias     | Low risk of bias     | Stated but not tested | Stated but not tested | Stated but not tested | Low risk of bias     | Unclear risk of bias |
| 185. | <b>Winokur 2003</b>     | Unclear risk of bias | Unclear risk of bias | Stated but not tested | Stated but not tested | Stated but not tested | Low risk of bias     | Low risk of bias     |
| 186. | <b>Yang 2003</b>        | Unclear risk of bias | Unclear risk of bias | Stated but not tested | Stated but not tested | Unclear risk of bias  | Unclear risk of bias | High risk of bias    |
| 187. | <b>Yevtushenko 2007</b> | Unclear risk of bias | Unclear risk of bias | Stated but not tested | Stated but not tested | Stated but not tested | Unclear risk of bias | Low risk of bias     |
| 188. | <b>Young 1987</b>       | Unclear risk of bias | Unclear risk of bias | Stated but not tested | Stated but not tested | Unclear risk of bias  | Unclear risk of bias | Unclear risk of bias |
| 189. | <b>Zivkov 1995</b>      | Low risk of bias     | Unclear risk of bias | Stated but not tested | Stated but not tested | Unclear risk of bias  | Low risk of bias     | Unclear risk of bias |
| 190. | <b>0600A-654</b>        | Unclear risk of bias | Unclear risk of bias | Stated but not tested | Stated but not tested | Unclear risk of bias  | Unclear risk of bias | High risk of bias    |
| 191. | <b>29060/356</b>        | Unclear risk of bias | Unclear risk of bias | Stated but not tested | Stated but not tested | Unclear risk of bias  | Low risk of bias     | Unclear risk of bias |



## 6 Results of network meta-analysis

### 6.1 Network diagrams for acceptability

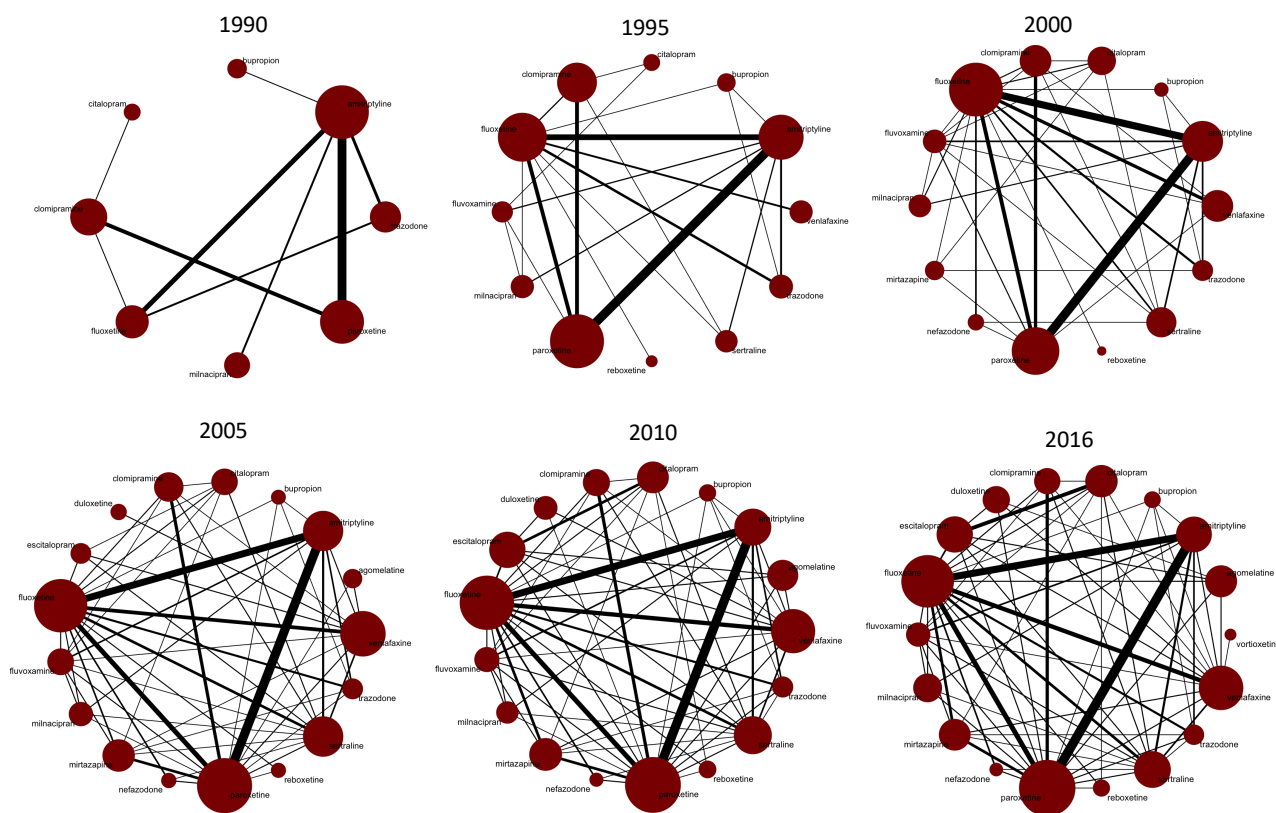

**Figure 2. Network diagrams for acceptability from 1990 to 2016.** Width of the lines is proportionate to the number of studies including that comparison. Size of nodes is proportionate to the number of randomized patients for that arm.



## 6.2 Forest plots

### 6.2.1 Efficacy

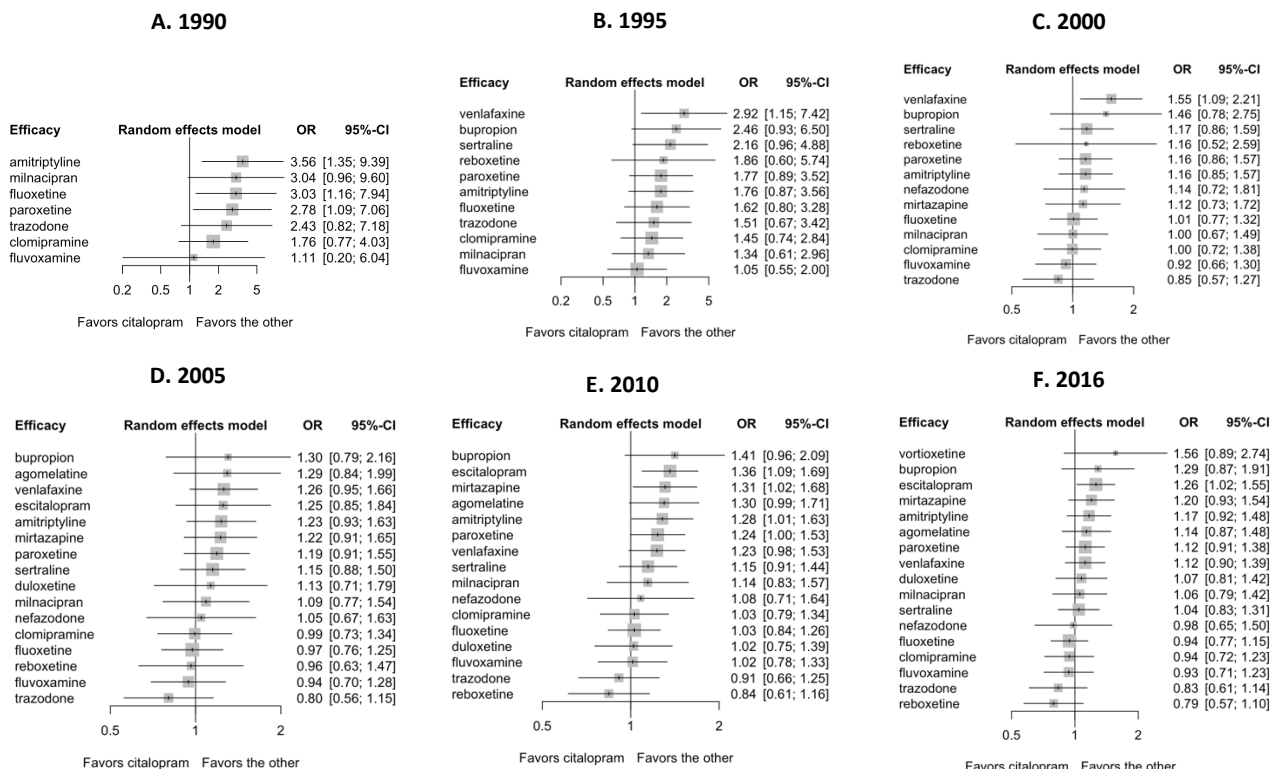

**eFigure 3. Forest plots for efficacy from 1990 to 2016**

### 6.2.2 Acceptability

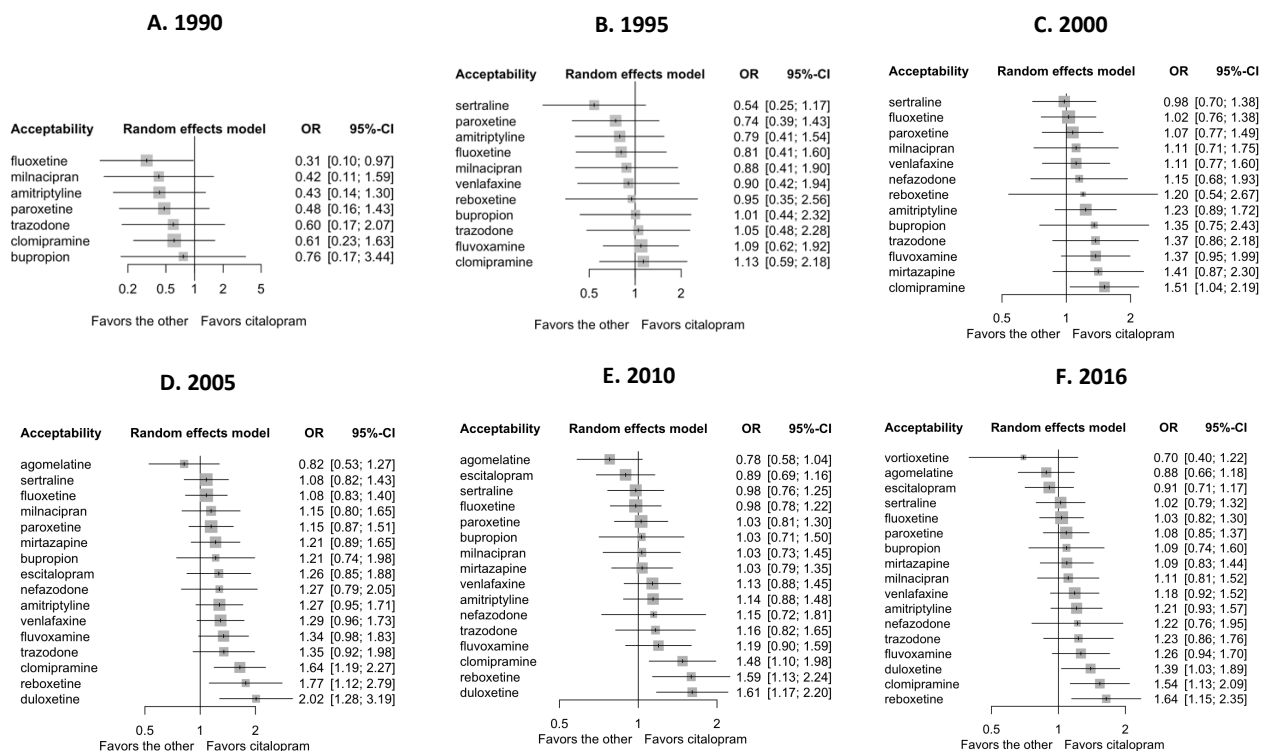

**eFigure 4. Forest plots for acceptability from 1990 to 2016**

### 6.3 Cumulative forest plots over the years for each drug in efficacy

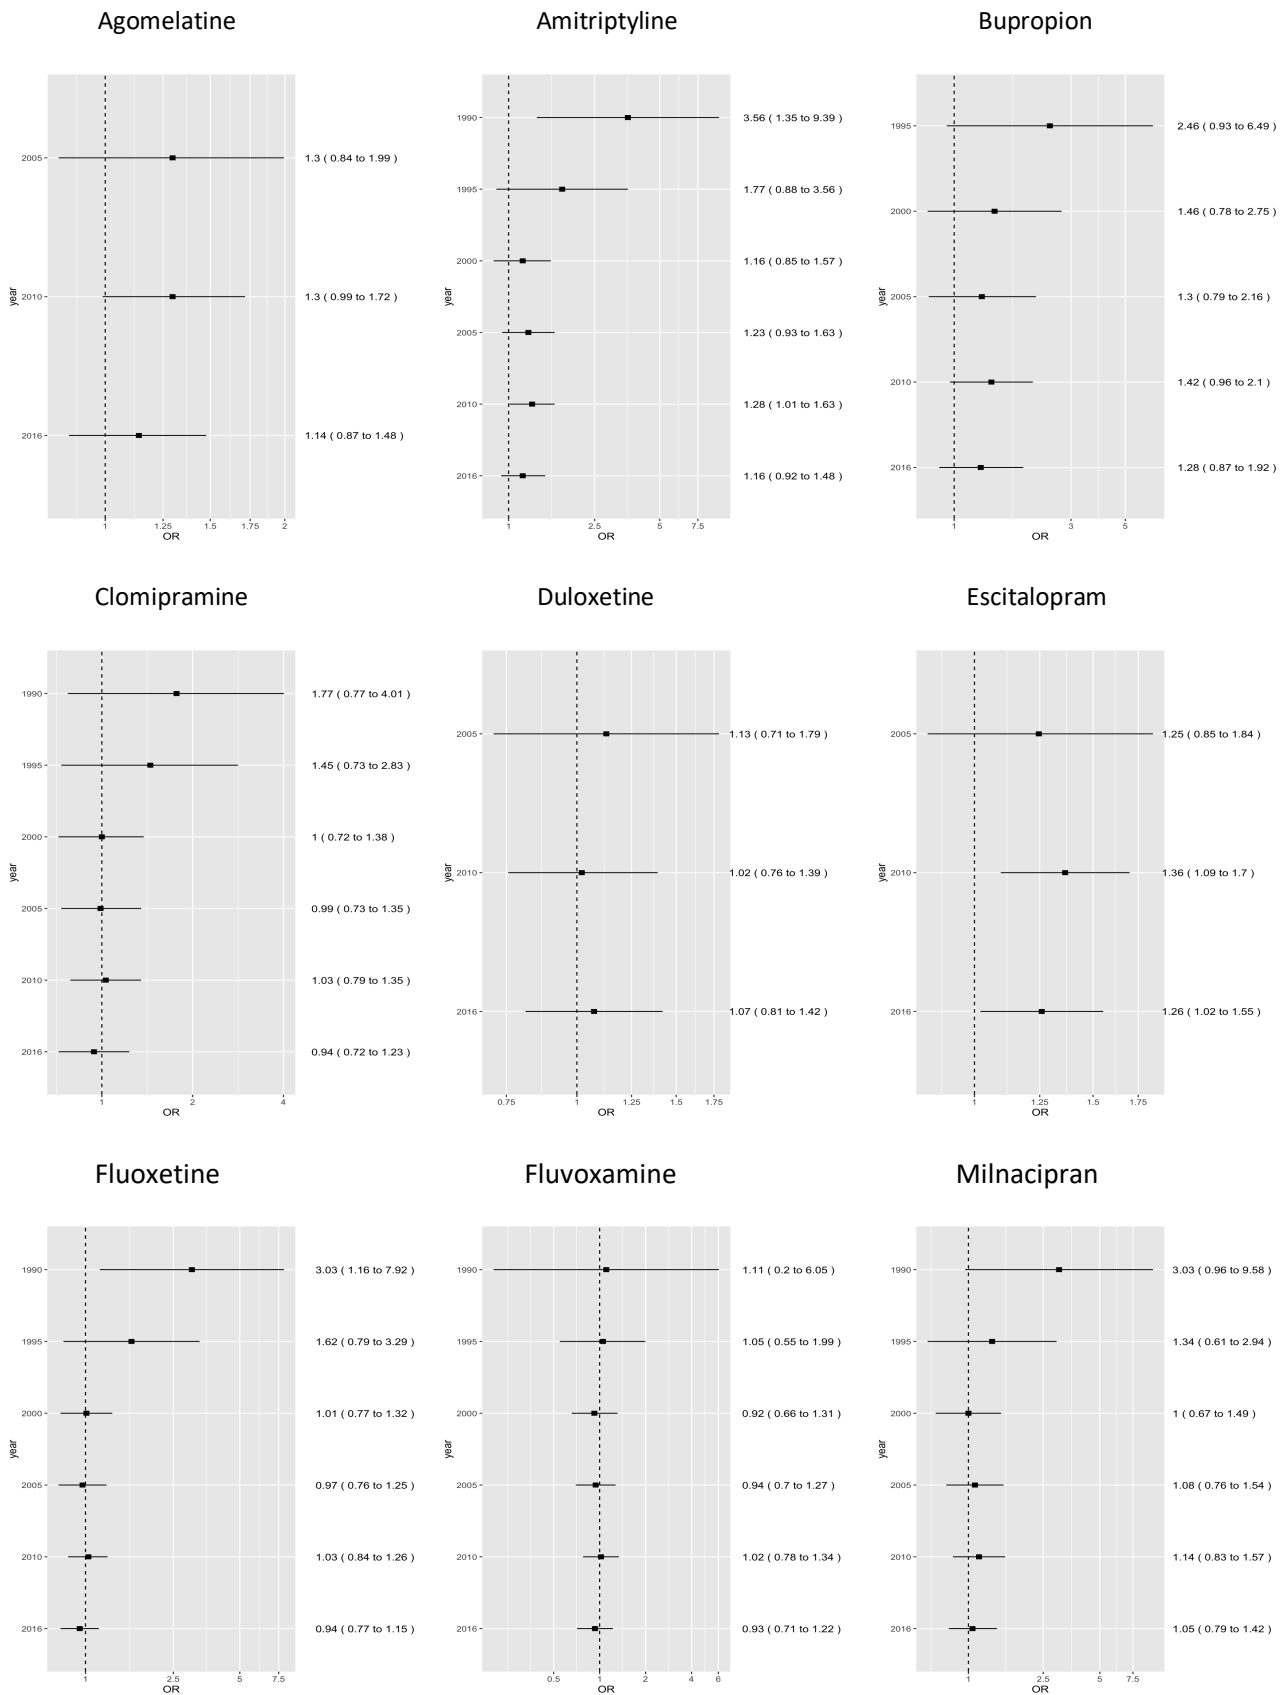

**eFigure 5. Cumulative forest plots for each drug in efficacy over the years (compared with citalopram) (to be cont'd).**

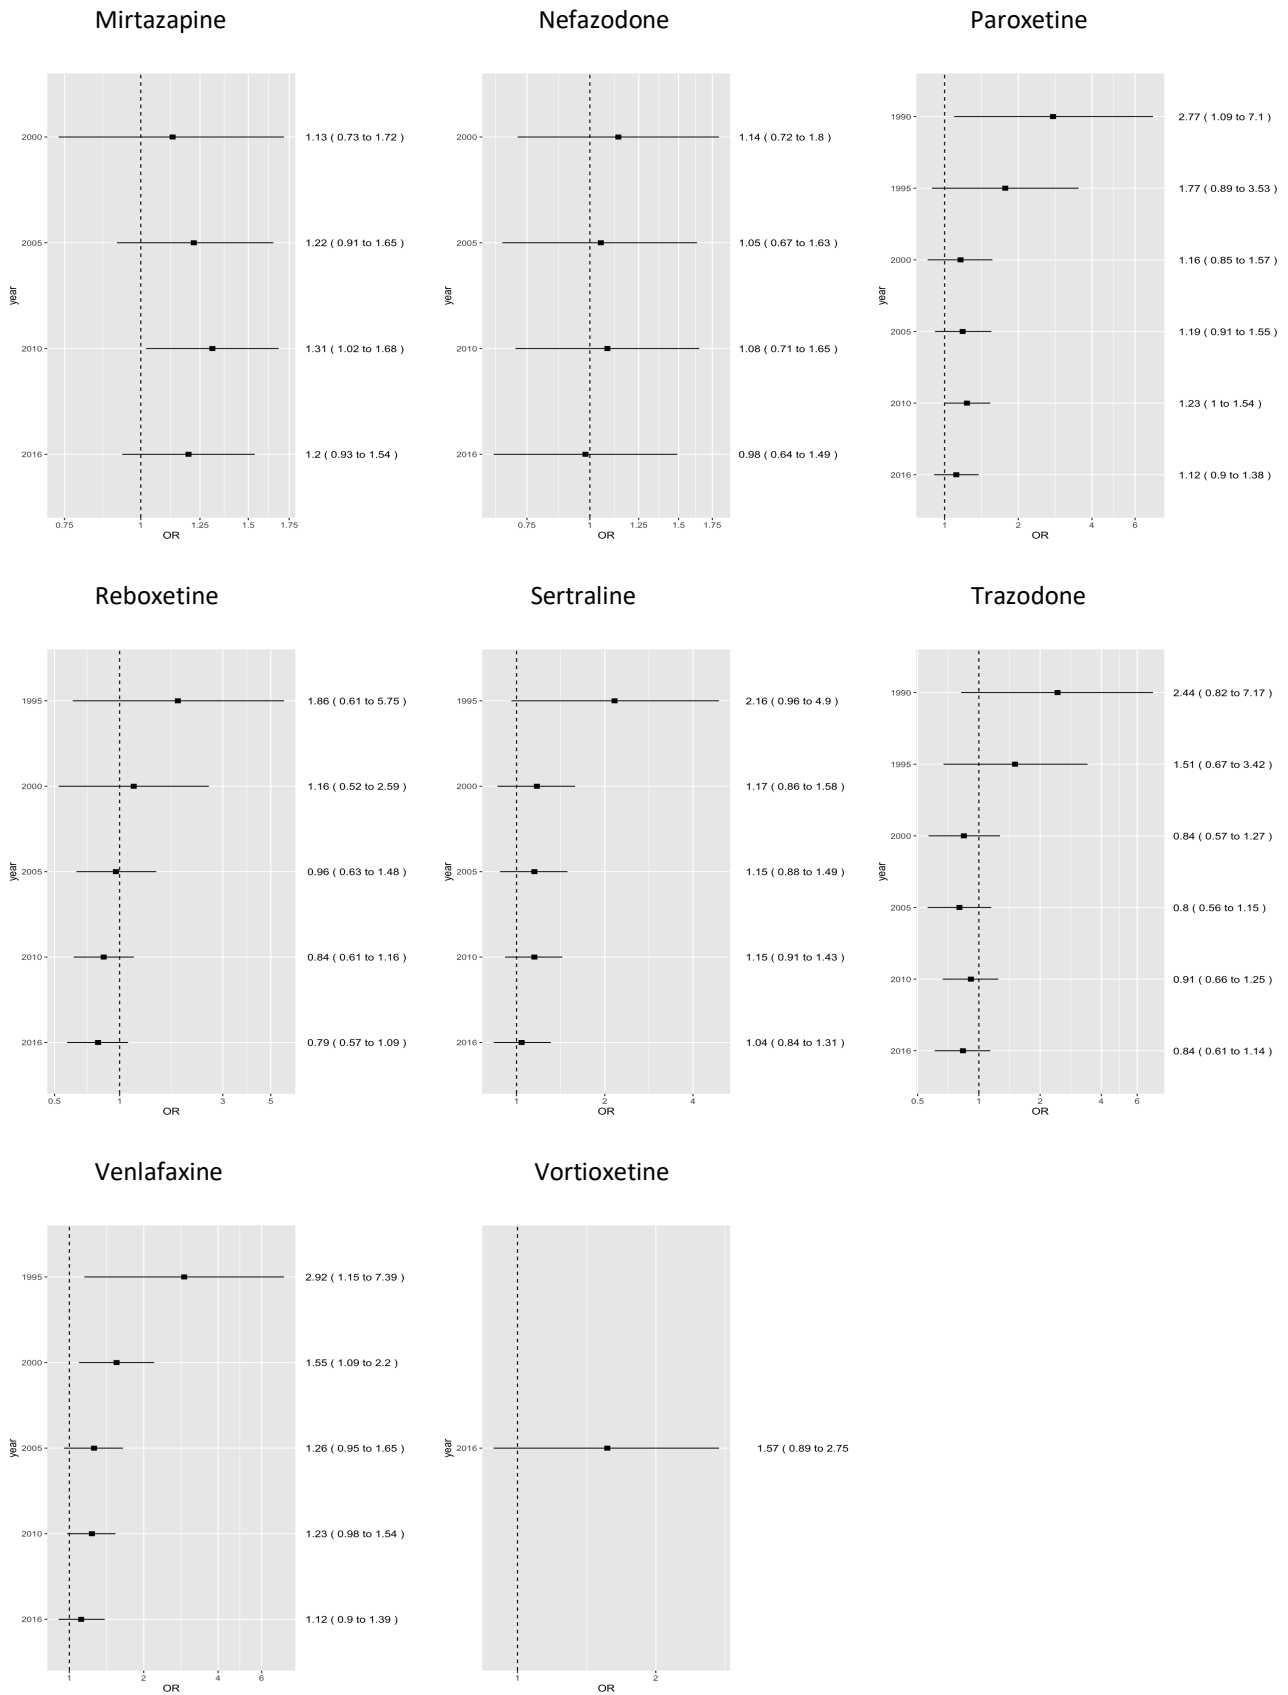

***eFigure 5 (cont'd). Cumulative forest plots for each drug in efficacy over the years (compared with citalopram).***

## 6.4 Comparison-adjusted funnel plots

### 6.4.1 Efficacy

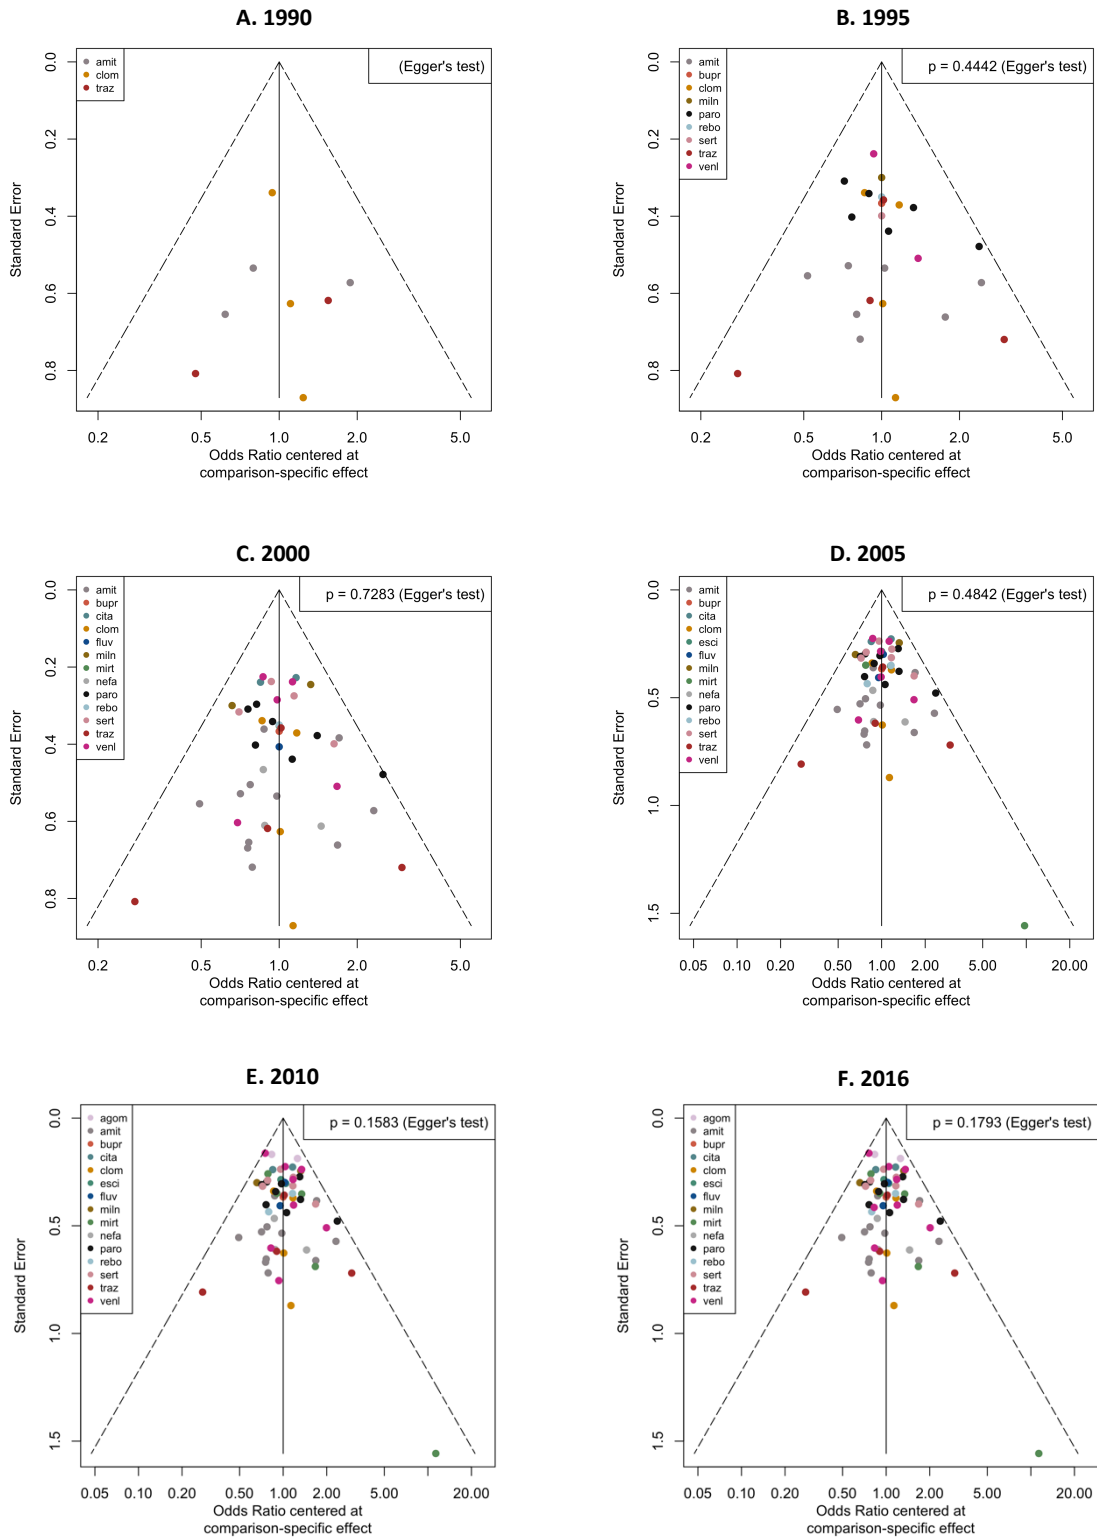

Egger's test for asymmetry:  $p=0.15$

Egger's test for asymmetry:  $p=0.18$

**eFigure 6. Funnel plots for efficacy from 1990 to 2016 (all the comparisons with fluoxetine).**

### 6.4.2 Acceptability

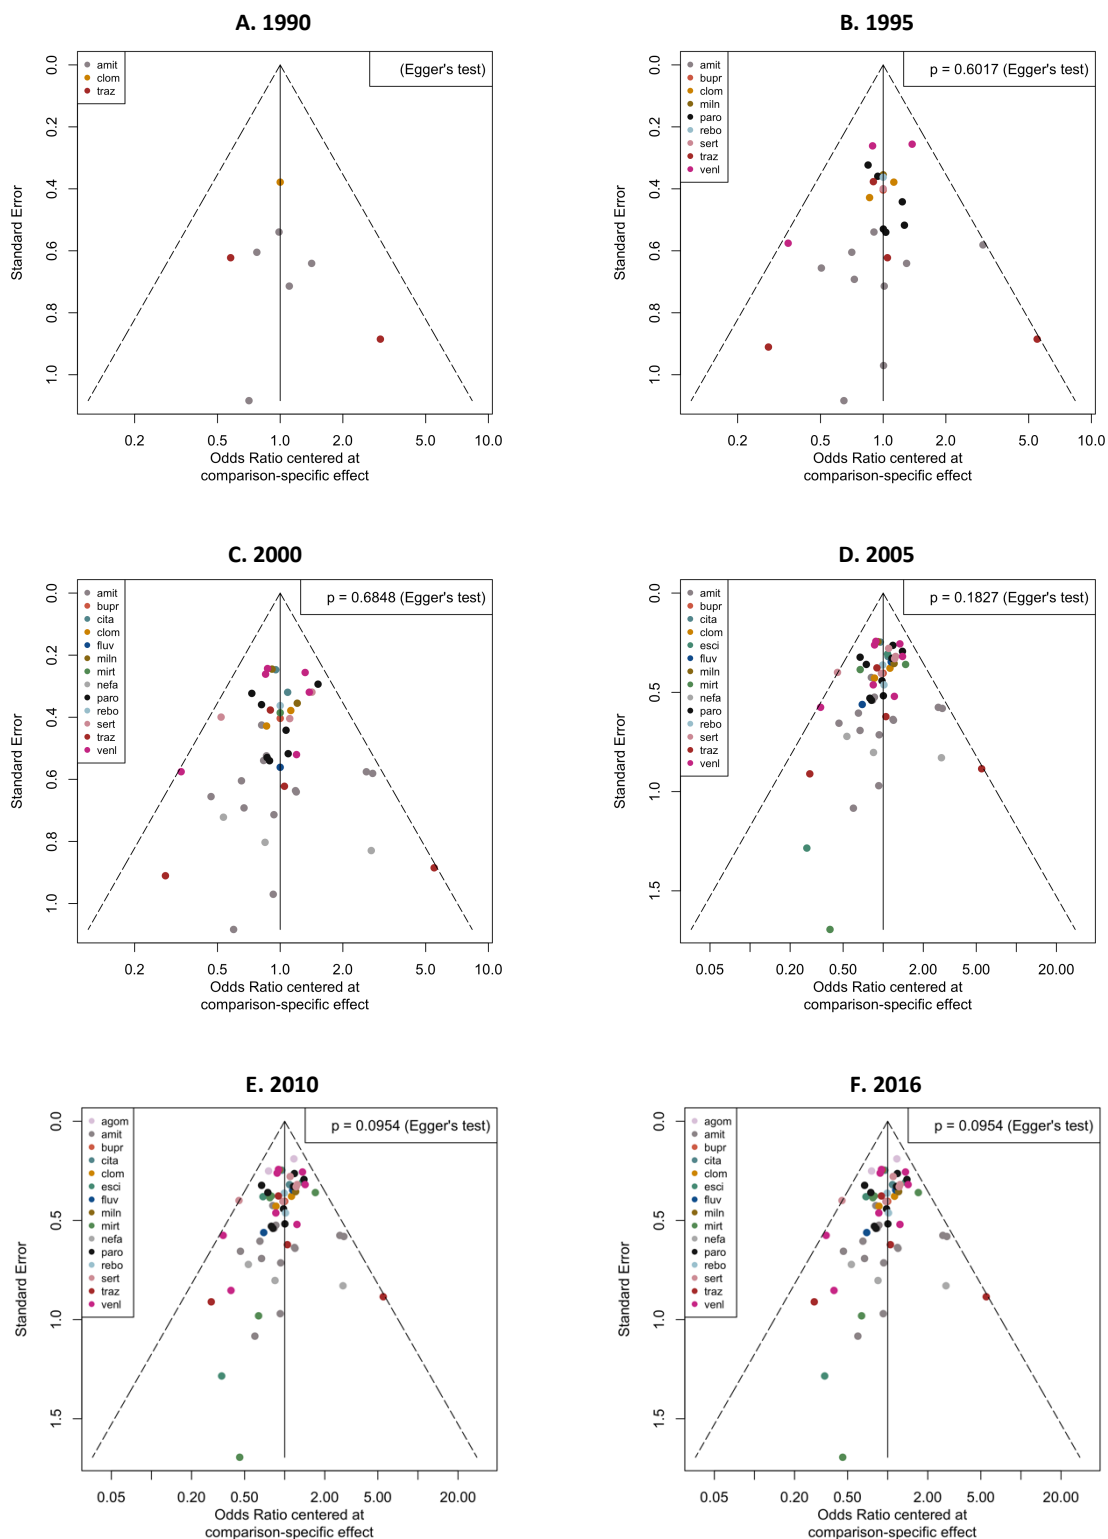

**Figure 7. Funnel plots for acceptability from 1990 to 2016 (all the comparisons with fluoxetine).**

## 7 Quality of evidence (GRADE) tables based on CINeMA

### 7.1 Efficacy

(1) 1990.

*eTable 3. CINeMA assessment for efficacy in 1990.*

| Comparison                  | No. of studies | Within-study bias | Across-studies bias | Indirectness | Imprecision    | Heterogeneity | Incoherence | Confidence rating |
|-----------------------------|----------------|-------------------|---------------------|--------------|----------------|---------------|-------------|-------------------|
| Amitriptyline: fluoxetine   | 4              | Some concerns     | Suspected           | No concerns  | Major concerns | No concerns   | No concerns | Very low          |
| Amitriptyline: milnacipran  | 2              | Some concerns     | Suspected           | No concerns  | Major concerns | No concerns   | No concerns | Very low          |
| Amitriptyline: paroxetine   | 6              | Some concerns     | Suspected           | No concerns  | Some concerns  | Some concerns | No concerns | Low               |
| Amitriptyline: trazodone    | 2              | Some concerns     | Suspected           | No concerns  | Some concerns  | Some concerns | No concerns | Low               |
| Citalopram: clomipramine    | 1              | No concerns       | Suspected           | No concerns  | Major concerns | No concerns   | No concerns | Low               |
| Clomipramine: fluoxetine    | 3              | Some concerns     | Suspected           | No concerns  | No concerns    | Some concerns | No concerns | Low               |
| Clomipramine: fluvoxamine   | 1              | No concerns       | Suspected           | No concerns  | Major concerns | No concerns   | No concerns | Low               |
| Clomipramine: paroxetine    | 4              | Some concerns     | Suspected           | No concerns  | No concerns    | Some concerns | No concerns | Low               |
| Fluoxetine: trazodone       | 2              | Some concerns     | Suspected           | No concerns  | Major concerns | No concerns   | No concerns | Very low          |
| Amitriptyline: citalopram   | 0              | Some concerns     | Suspected           | No concerns  | No concerns    | No concerns   | No concerns | Low               |
| Amitriptyline: clomipramine | 0              | Some concerns     | Suspected           | No concerns  | No concerns    | No concerns   | No concerns | Low               |
| Amitriptyline: fluvoxamine  | 0              | Some concerns     | Suspected           | No concerns  | Major concerns | No concerns   | No concerns | Very low          |
| Citalopram: fluoxetine      | 0              | Some concerns     | Undetected          | No concerns  | No concerns    | No concerns   | No concerns | Moderate          |
| Citalopram: fluvoxamine     | 0              | No concerns       | Suspected           | No concerns  | Major concerns | No concerns   | No concerns | Low               |
| Citalopram: milnacipran     | 0              | Some concerns     | Suspected           | No concerns  | Some concerns  | No concerns   | No concerns | Low               |
| Citalopram: paroxetine      | 0              | Some concerns     | Undetected          | No concerns  | No concerns    | Some concerns | No concerns | Moderate          |
| Citalopram: trazodone       | 0              | Some concerns     | Suspected           | No concerns  | Some concerns  | Some concerns | No concerns | Low               |
| Clomipramine: milnacipran   | 0              | Some concerns     | Suspected           | No concerns  | Major concerns | No concerns   | No concerns | Very low          |
| Clomipramine: trazodone     | 0              | Some concerns     | Suspected           | No concerns  | Major concerns | No concerns   | No concerns | Very low          |
| Fluoxetine: fluvoxamine     | 0              | Some concerns     | Suspected           | No concerns  | Major concerns | No concerns   | No concerns | Very low          |
| Fluoxetine: milnacipran     | 0              | Some concerns     | Suspected           | No concerns  | Major concerns | No concerns   | No concerns | Very low          |
| Fluoxetine: paroxetine      | 0              | Some concerns     | Undetected          | No concerns  | Major concerns | No concerns   | No concerns | Low               |
| Fluvoxamine: milnacipran    | 0              | Some concerns     | Suspected           | No concerns  | Major concerns | No concerns   | No concerns | Very low          |
| Fluvoxamine: paroxetine     | 0              | Some concerns     | Suspected           | No concerns  | Major concerns | No concerns   | No concerns | Very low          |
| Fluvoxamine: trazodone      | 0              | Some concerns     | Suspected           | No concerns  | Major concerns | No concerns   | No concerns | Very low          |
| Milnacipran: paroxetine     | 0              | Some concerns     | Suspected           | No concerns  | Major concerns | No concerns   | No concerns | Very low          |
| Milnacipran: trazodone      | 0              | Some concerns     | Suspected           | No concerns  | Major concerns | No concerns   | No concerns | Very low          |
| Paroxetine: trazodone       | 0              | Some concerns     | Suspected           | No concerns  | Major concerns | No concerns   | No concerns | Very low          |

(2) 1995

*eTable 4. CINeMA assessment for efficacy in 1995.*

| Comparison                  | No. of studies | Within-study bias | Across-studies bias | Indirectness | Imprecision    | Heterogeneity  | Incoherence   | Confidence rating |
|-----------------------------|----------------|-------------------|---------------------|--------------|----------------|----------------|---------------|-------------------|
| Amitriptyline: fluoxetine   | 8              | Some concerns     | Suspected           | No concerns  | Some concerns  | Some concerns  | No concerns   | Low               |
| Amitriptyline: fluvoxamine  | 2              | Some concerns     | Suspected           | No concerns  | No concerns    | Major concerns | No concerns   | Very low          |
| Amitriptyline: milnacipran  | 2              | Some concerns     | Suspected           | No concerns  | Some concerns  | Some concerns  | No concerns   | Low               |
| Amitriptyline: paroxetine   | 11             | Some concerns     | Suspected           | No concerns  | Major concerns | No concerns    | No concerns   | Very low          |
| Amitriptyline: sertraline   | 2              | Some concerns     | Suspected           | No concerns  | Major concerns | No concerns    | No concerns   | Very low          |
| Amitriptyline: trazodone    | 2              | Some concerns     | Suspected           | No concerns  | Major concerns | No concerns    | No concerns   | Very low          |
| Bupropion: fluoxetine       | 1              | Some concerns     | Undetected          | No concerns  | Major concerns | No concerns    | No concerns   | Low               |
| Bupropion: trazodone        | 1              | Some concerns     | Suspected           | No concerns  | Some concerns  | Some concerns  | No concerns   | Low               |
| Citalopram: clomipramine    | 1              | No concerns       | Suspected           | No concerns  | Major concerns | No concerns    | No concerns   | Low               |
| Citalopram: fluvoxamine     | 1              | No concerns       | Suspected           | No concerns  | Major concerns | No concerns    | No concerns   | Low               |
| Clomipramine: fluoxetine    | 4              | Some concerns     | Suspected           | No concerns  | Some concerns  | Some concerns  | Some concerns | Very low          |
| Clomipramine: fluvoxamine   | 1              | Some concerns     | Suspected           | No concerns  | Some concerns  | Some concerns  | No concerns   | Low               |
| Clomipramine: paroxetine    | 6              | Some concerns     | Suspected           | No concerns  | Some concerns  | Some concerns  | No concerns   | Low               |
| Clomipramine: sertraline    | 1              | Some concerns     | Suspected           | No concerns  | Some concerns  | Some concerns  | No concerns   | Low               |
| Fluoxetine: milnacipran     | 1              | No concerns       | Suspected           | No concerns  | Major concerns | No concerns    | No concerns   | Low               |
| Fluoxetine: paroxetine      | 6              | Some concerns     | Undetected          | No concerns  | Some concerns  | Some concerns  | No concerns   | Moderate          |
| Fluoxetine: reboxetine      | 1              | Some concerns     | Suspected           | No concerns  | Major concerns | No concerns    | No concerns   | Very low          |
| Fluoxetine: sertraline      | 1              | Some concerns     | Undetected          | No concerns  | Some concerns  | Some concerns  | No concerns   | Moderate          |
| Fluoxetine: trazodone       | 4              | Some concerns     | Suspected           | No concerns  | Major concerns | No concerns    | No concerns   | Very low          |
| Fluoxetine: venlafaxine     | 2              | Some concerns     | Undetected          | No concerns  | Some concerns  | Some concerns  | No concerns   | Moderate          |
| Fluvoxamine: milnacipran    | 1              | Some concerns     | Suspected           | No concerns  | Major concerns | No concerns    | No concerns   | Very low          |
| Fluvoxamine: paroxetine     | 1              | Some concerns     | Suspected           | No concerns  | No concerns    | Major concerns | No concerns   | Very low          |
| Amitriptyline: bupropion    | 0              | Some concerns     | Suspected           | No concerns  | Major concerns | No concerns    | No concerns   | Very low          |
| Amitriptyline: citalopram   | 0              | Some concerns     | Suspected           | No concerns  | Some concerns  | Some concerns  | No concerns   | Low               |
| Amitriptyline: clomipramine | 0              | Some concerns     | Suspected           | No concerns  | Some concerns  | Some concerns  | No concerns   | Low               |
| Amitriptyline: reboxetine   | 0              | Some concerns     | Suspected           | No concerns  | Major concerns | No concerns    | No concerns   | Very low          |
| Amitriptyline: venlafaxine  | 0              | Some concerns     | Suspected           | No concerns  | Some concerns  | Some concerns  | No concerns   | Low               |
| Bupropion: citalopram       | 0              | Some concerns     | Undetected          | No concerns  | Some concerns  | Some concerns  | No concerns   | Moderate          |
| Bupropion: clomipramine     | 0              | Some concerns     | Suspected           | No concerns  | Some concerns  | Some concerns  | No concerns   | Low               |
| Bupropion: fluvoxamine      | 0              | Some concerns     | Suspected           | No concerns  | No concerns    | Some concerns  | No concerns   | Low               |
| Bupropion: milnacipran      | 0              | Some concerns     | Suspected           | No concerns  | Some concerns  | Some concerns  | No concerns   | Low               |
| Bupropion: paroxetine       | 0              | Some concerns     | Undetected          | No concerns  | Major concerns | No concerns    | No concerns   | Low               |
| Bupropion: reboxetine       | 0              | Some concerns     | Suspected           | No concerns  | Major concerns | No concerns    | No concerns   | Very low          |
| Bupropion: sertraline       | 0              | Some concerns     | Undetected          | No concerns  | Major concerns | No concerns    | No concerns   | Low               |

|                           |   |               |            |             |                |               |             |          |
|---------------------------|---|---------------|------------|-------------|----------------|---------------|-------------|----------|
| Bupropion: venlafaxine    | 0 | Some concerns | Undetected | No concerns | Major concerns | No concerns   | No concerns | Low      |
| Citalopram: fluoxetine    | 0 | No concerns   | Undetected | No concerns | Major concerns | No concerns   | No concerns | Moderate |
| Citalopram: milnacipran   | 0 | No concerns   | Suspected  | No concerns | Major concerns | No concerns   | No concerns | Low      |
| Citalopram: paroxetine    | 0 | No concerns   | Undetected | No concerns | Some concerns  | Some concerns | No concerns | Moderate |
| Citalopram: reboxetine    | 0 | Some concerns | Suspected  | No concerns | Major concerns | No concerns   | No concerns | Very low |
| Citalopram: sertraline    | 0 | Some concerns | Undetected | No concerns | Some concerns  | Some concerns | No concerns | Moderate |
| Citalopram: trazodone     | 0 | Some concerns | Suspected  | No concerns | Major concerns | No concerns   | No concerns | Very low |
| Citalopram: venlafaxine   | 0 | Some concerns | Undetected | No concerns | No concerns    | Some concerns | No concerns | Moderate |
| Clomipramine: milnacipran | 0 | Some concerns | Suspected  | No concerns | Major concerns | No concerns   | No concerns | Very low |
| Clomipramine: reboxetine  | 0 | Some concerns | Suspected  | No concerns | Major concerns | No concerns   | No concerns | Very low |
| Clomipramine: trazodone   | 0 | Some concerns | Suspected  | No concerns | Major concerns | No concerns   | No concerns | Very low |
| Clomipramine: venlafaxine | 0 | Some concerns | Suspected  | No concerns | No concerns    | Some concerns | No concerns | Low      |
| Fluoxetine: fluvoxamine   | 0 | Some concerns | Suspected  | No concerns | Some concerns  | Some concerns | No concerns | Low      |
| Fluvoxamine: reboxetine   | 0 | Some concerns | Suspected  | No concerns | Major concerns | No concerns   | No concerns | Very low |
| Fluvoxamine: sertraline   | 0 | Some concerns | Suspected  | No concerns | No concerns    | Some concerns | No concerns | Low      |
| Fluvoxamine: trazodone    | 0 | Some concerns | Suspected  | No concerns | Major concerns | No concerns   | No concerns | Very low |
| Fluvoxamine: venlafaxine  | 0 | Some concerns | Suspected  | No concerns | No concerns    | No concerns   | No concerns | Low      |
| Milnacipran: paroxetine   | 0 | Some concerns | Suspected  | No concerns | Major concerns | No concerns   | No concerns | Very low |
| Milnacipran: reboxetine   | 0 | Some concerns | Suspected  | No concerns | Major concerns | No concerns   | No concerns | Very low |
| Milnacipran: sertraline   | 0 | Some concerns | Suspected  | No concerns | Some concerns  | Some concerns | No concerns | Low      |
| Milnacipran: trazodone    | 0 | Some concerns | Suspected  | No concerns | Major concerns | No concerns   | No concerns | Very low |
| Milnacipran: venlafaxine  | 0 | Some concerns | Suspected  | No concerns | Some concerns  | No concerns   | No concerns | Low      |
| Paroxetine: reboxetine    | 0 | Some concerns | Suspected  | No concerns | Major concerns | No concerns   | No concerns | Very low |
| Paroxetine: sertraline    | 0 | Some concerns | Undetected | No concerns | Major concerns | No concerns   | No concerns | Low      |
| Paroxetine: trazodone     | 0 | Some concerns | Suspected  | No concerns | Major concerns | No concerns   | No concerns | Very low |
| Paroxetine: venlafaxine   | 0 | Some concerns | Undetected | No concerns | Some concerns  | Some concerns | No concerns | Moderate |
| Reboxetine: sertraline    | 0 | Some concerns | Suspected  | No concerns | Major concerns | No concerns   | No concerns | Very low |
| Reboxetine: trazodone     | 0 | Some concerns | Suspected  | No concerns | Major concerns | No concerns   | No concerns | Very low |
| Reboxetine: venlafaxine   | 0 | Some concerns | Suspected  | No concerns | Major concerns | No concerns   | No concerns | Very low |
| Sertraline: trazodone     | 0 | Some concerns | Suspected  | No concerns | Major concerns | No concerns   | No concerns | Very low |
| Sertraline: venlafaxine   | 0 | Some concerns | Undetected | No concerns | Major concerns | No concerns   | No concerns | Low      |
| Trazodone: venlafaxine    | 0 | Some concerns | Suspected  | No concerns | Some concerns  | Some concerns | No concerns | Low      |



(3) 2000

eTable 5. CINeMA assessment for efficacy in 2000.

| Comparison                 | No. of studies | Within-study bias | Across-studies bias | Indirectness | Imprecision    | Heterogeneity  | Incoherence    | Confidence rating |
|----------------------------|----------------|-------------------|---------------------|--------------|----------------|----------------|----------------|-------------------|
| Amitriptyline: fluoxetine  | 12             | Some concerns     | Suspected           | No concerns  | Some concerns  | Some concerns  | No concerns    | Low               |
| Amitriptyline: fluvoxamine | 3              | Some concerns     | Suspected           | No concerns  | Some concerns  | No concerns    | No concerns    | Low               |
| Amitriptyline: milnacipran | 2              | No concerns       | Suspected           | No concerns  | Some concerns  | Some concerns  | No concerns    | Low               |
| Amitriptyline: paroxetine  | 12             | Some concerns     | Suspected           | No concerns  | No concerns    | Major concerns | No concerns    | Very low          |
| Amitriptyline: sertraline  | 3              | Some concerns     | Suspected           | No concerns  | Major concerns | No concerns    | No concerns    | Very low          |
| Amitriptyline: trazodone   | 2              | Some concerns     | Suspected           | No concerns  | Some concerns  | No concerns    | No concerns    | Low               |
| Bupropion: fluoxetine      | 1              | Some concerns     | Undetected          | No concerns  | Some concerns  | Some concerns  | No concerns    | Moderate          |
| Bupropion: trazodone       | 1              | Some concerns     | Suspected           | No concerns  | Some concerns  | No concerns    | No concerns    | Low               |
| Citalopram: clomipramine   | 1              | No concerns       | Suspected           | No concerns  | Major concerns | No concerns    | No concerns    | Low               |
| Citalopram: fluoxetine     | 2              | No concerns       | Undetected          | No concerns  | Major concerns | No concerns    | No concerns    | Moderate          |
| Citalopram: fluvoxamine    | 1              | No concerns       | Suspected           | No concerns  | Major concerns | No concerns    | No concerns    | Low               |
| Citalopram: mirtazapine    | 1              | No concerns       | Undetected          | No concerns  | Major concerns | No concerns    | No concerns    | Moderate          |
| Citalopram: sertraline     | 1              | No concerns       | Undetected          | No concerns  | Some concerns  | Some concerns  | No concerns    | Moderate          |
| Clomipramine: fluoxetine   | 4              | Some concerns     | Suspected           | No concerns  | Some concerns  | Some concerns  | Major concerns | Very low          |
| Clomipramine: fluvoxamine  | 2              | Some concerns     | Suspected           | No concerns  | Major concerns | No concerns    | No concerns    | Very low          |
| Clomipramine: milnacipran  | 1              | No concerns       | Suspected           | No concerns  | Major concerns | No concerns    | No concerns    | Low               |
| Clomipramine: paroxetine   | 6              | Some concerns     | Suspected           | No concerns  | Some concerns  | Some concerns  | No concerns    | Low               |
| Clomipramine: sertraline   | 1              | Some concerns     | Suspected           | No concerns  | Some concerns  | Some concerns  | No concerns    | Low               |
| Clomipramine: trazodone    | 1              | Some concerns     | Suspected           | No concerns  | Some concerns  | Some concerns  | No concerns    | Low               |
| Clomipramine: venlafaxine  | 2              | Some concerns     | Suspected           | No concerns  | No concerns    | No concerns    | No concerns    | Low               |
| Fluoxetine: fluvoxamine    | 1              | No concerns       | Suspected           | No concerns  | Some concerns  | Some concerns  | No concerns    | Low               |
| Fluoxetine: milnacipran    | 2              | No concerns       | Suspected           | No concerns  | Major concerns | No concerns    | No concerns    | Low               |
| Fluoxetine: mirtazapine    | 1              | No concerns       | Undetected          | No concerns  | Major concerns | No concerns    | Some concerns  | Moderate          |
| Fluoxetine: nefazodone     | 3              | Some concerns     | Undetected          | No concerns  | Major concerns | No concerns    | No concerns    | Low               |
| Fluoxetine: paroxetine     | 7              | No concerns       | Undetected          | No concerns  | Some concerns  | Some concerns  | No concerns    | Moderate          |
| Fluoxetine: reboxetine     | 1              | Some concerns     | Suspected           | No concerns  | Major concerns | No concerns    | No concerns    | Very low          |
| Fluoxetine: sertraline     | 4              | Some concerns     | Undetected          | No concerns  | Some concerns  | Some concerns  | Some concerns  | Low               |
| Fluoxetine: trazodone      | 4              | Some concerns     | Suspected           | No concerns  | Some concerns  | Some concerns  | No concerns    | Low               |
| Fluoxetine: venlafaxine    | 5              | Some concerns     | Undetected          | No concerns  | No concerns    | No concerns    | No concerns    | Moderate          |
| Fluvoxamine: milnacipran   | 1              | No concerns       | Suspected           | No concerns  | Major concerns | No concerns    | No concerns    | Low               |
| Fluvoxamine: paroxetine    | 2              | Some concerns     | Suspected           | No concerns  | Some concerns  | No concerns    | No concerns    | Low               |
| Fluvoxamine: sertraline    | 1              | Some concerns     | Suspected           | No concerns  | Some concerns  | No concerns    | No concerns    | Low               |
| Fluvoxamine: venlafaxine   | 1              | Some concerns     | Suspected           | No concerns  | No concerns    | No concerns    | No concerns    | Low               |
| Mirtazapine: paroxetine    | 1              | No concerns       | Undetected          | No concerns  | Major concerns | No concerns    | No concerns    | Moderate          |

|                             |   |               |            |             |                |               |             |          |
|-----------------------------|---|---------------|------------|-------------|----------------|---------------|-------------|----------|
| Mirtazapine: trazodone      | 1 | Some concerns | Suspected  | No concerns | Some concerns  | Some concerns | No concerns | Low      |
| Nefazodone: paroxetine      | 1 | Some concerns | Undetected | No concerns | Major concerns | No concerns   | No concerns | Low      |
| Nefazodone: sertraline      | 1 | Some concerns | Undetected | No concerns | Major concerns | No concerns   | No concerns | Low      |
| Paroxetine: venlafaxine     | 1 | Some concerns | Undetected | No concerns | No concerns    | Some concerns | No concerns | Moderate |
| Trazodone: venlafaxine      | 1 | Some concerns | Suspected  | No concerns | No concerns    | No concerns   | No concerns | Low      |
| Amitriptyline: bupropion    | 0 | Some concerns | Suspected  | No concerns | Major concerns | No concerns   | No concerns | Very low |
| Amitriptyline: citalopram   | 0 | No concerns   | Suspected  | No concerns | Some concerns  | Some concerns | No concerns | Low      |
| Amitriptyline: clomipramine | 0 | Some concerns | Suspected  | No concerns | Some concerns  | Some concerns | No concerns | Low      |
| Amitriptyline: mirtazapine  | 0 | No concerns   | Suspected  | No concerns | Major concerns | No concerns   | No concerns | Low      |
| Amitriptyline: nefazodone   | 0 | Some concerns | Suspected  | No concerns | Major concerns | No concerns   | No concerns | Very low |
| Amitriptyline: reboxetine   | 0 | Some concerns | Suspected  | No concerns | Major concerns | No concerns   | No concerns | Very low |
| Amitriptyline: venlafaxine  | 0 | Some concerns | Suspected  | No concerns | No concerns    | Some concerns | No concerns | Low      |
| Bupropion: citalopram       | 0 | Some concerns | Undetected | No concerns | Major concerns | No concerns   | No concerns | Low      |
| Bupropion: clomipramine     | 0 | Some concerns | Suspected  | No concerns | Major concerns | No concerns   | No concerns | Very low |
| Bupropion: fluvoxamine      | 0 | Some concerns | Suspected  | No concerns | Some concerns  | Some concerns | No concerns | Low      |
| Bupropion: milnacipran      | 0 | Some concerns | Suspected  | No concerns | Major concerns | No concerns   | No concerns | Very low |
| Bupropion: mirtazapine      | 0 | Some concerns | Undetected | No concerns | Major concerns | No concerns   | No concerns | Low      |
| Bupropion: nefazodone       | 0 | Some concerns | Undetected | No concerns | Major concerns | No concerns   | No concerns | Low      |
| Bupropion: paroxetine       | 0 | Some concerns | Undetected | No concerns | Major concerns | No concerns   | No concerns | Low      |
| Bupropion: reboxetine       | 0 | Some concerns | Suspected  | No concerns | Major concerns | No concerns   | No concerns | Very low |
| Bupropion: sertraline       | 0 | Some concerns | Undetected | No concerns | Major concerns | No concerns   | No concerns | Low      |
| Bupropion: venlafaxine      | 0 | Some concerns | Undetected | No concerns | Major concerns | No concerns   | No concerns | Low      |
| Citalopram: milnacipran     | 0 | No concerns   | Suspected  | No concerns | Major concerns | No concerns   | No concerns | Low      |
| Citalopram: nefazodone      | 0 | Some concerns | Undetected | No concerns | Major concerns | No concerns   | No concerns | Low      |
| Citalopram: paroxetine      | 0 | No concerns   | Undetected | No concerns | Some concerns  | Some concerns | No concerns | Moderate |
| Citalopram: reboxetine      | 0 | Some concerns | Suspected  | No concerns | Major concerns | No concerns   | No concerns | Very low |
| Citalopram: trazodone       | 0 | Some concerns | Suspected  | No concerns | Major concerns | No concerns   | No concerns | Very low |
| Citalopram: venlafaxine     | 0 | Some concerns | Undetected | No concerns | No concerns    | Some concerns | No concerns | Moderate |
| Clomipramine: mirtazapine   | 0 | Some concerns | Suspected  | No concerns | Major concerns | No concerns   | No concerns | Very low |
| Clomipramine: nefazodone    | 0 | Some concerns | Suspected  | No concerns | Major concerns | No concerns   | No concerns | Very low |
| Clomipramine: reboxetine    | 0 | Some concerns | Suspected  | No concerns | Major concerns | No concerns   | No concerns | Very low |
| Fluvoxamine: mirtazapine    | 0 | No concerns   | Suspected  | No concerns | Major concerns | No concerns   | No concerns | Low      |
| Fluvoxamine: nefazodone     | 0 | Some concerns | Suspected  | No concerns | Major concerns | No concerns   | No concerns | Very low |
| Fluvoxamine: reboxetine     | 0 | Some concerns | Suspected  | No concerns | Major concerns | No concerns   | No concerns | Very low |
| Fluvoxamine: trazodone      | 0 | Some concerns | Suspected  | No concerns | Major concerns | No concerns   | No concerns | Very low |
| Milnacipran: mirtazapine    | 0 | No concerns   | Suspected  | No concerns | Major concerns | No concerns   | No concerns | Low      |
| Milnacipran: nefazodone     | 0 | Some concerns | Suspected  | No concerns | Major concerns | No concerns   | No concerns | Very low |

|                          |   |               |            |             |                |               |             |          |
|--------------------------|---|---------------|------------|-------------|----------------|---------------|-------------|----------|
| Milnacipran: paroxetine  | 0 | No concerns   | Suspected  | No concerns | Some concerns  | Some concerns | No concerns | Low      |
| Milnacipran: reboxetine  | 0 | Some concerns | Suspected  | No concerns | Major concerns | No concerns   | No concerns | Very low |
| Milnacipran: sertraline  | 0 | No concerns   | Suspected  | No concerns | Some concerns  | Some concerns | No concerns | Low      |
| Milnacipran: trazodone   | 0 | Some concerns | Suspected  | No concerns | Major concerns | No concerns   | No concerns | Very low |
| Milnacipran: venlafaxine | 0 | Some concerns | Suspected  | No concerns | No concerns    | Some concerns | No concerns | Low      |
| Mirtazapine: nefazodone  | 0 | Some concerns | Undetected | No concerns | Major concerns | No concerns   | No concerns | Low      |
| Mirtazapine: reboxetine  | 0 | Some concerns | Suspected  | No concerns | Major concerns | No concerns   | No concerns | Very low |
| Mirtazapine: sertraline  | 0 | No concerns   | Undetected | No concerns | Major concerns | No concerns   | No concerns | Moderate |
| Mirtazapine: venlafaxine | 0 | Some concerns | Undetected | No concerns | Some concerns  | Some concerns | No concerns | Moderate |
| Nefazodone: reboxetine   | 0 | Some concerns | Suspected  | No concerns | Major concerns | No concerns   | No concerns | Very low |
| Nefazodone: trazodone    | 0 | Some concerns | Suspected  | No concerns | Some concerns  | Some concerns | No concerns | Low      |
| Nefazodone: venlafaxine  | 0 | Some concerns | Undetected | No concerns | Some concerns  | Some concerns | No concerns | Moderate |
| Paroxetine: reboxetine   | 0 | Some concerns | Suspected  | No concerns | Major concerns | No concerns   | No concerns | Very low |
| Paroxetine: sertraline   | 0 | Some concerns | Undetected | No concerns | Major concerns | No concerns   | No concerns | Low      |
| Paroxetine: trazodone    | 0 | Some concerns | Suspected  | No concerns | Some concerns  | No concerns   | No concerns | Low      |
| Reboxetine: sertraline   | 0 | Some concerns | Suspected  | No concerns | Major concerns | No concerns   | No concerns | Very low |
| Reboxetine: trazodone    | 0 | Some concerns | Suspected  | No concerns | Major concerns | No concerns   | No concerns | Very low |
| Reboxetine: venlafaxine  | 0 | Some concerns | Suspected  | No concerns | Major concerns | No concerns   | No concerns | Very low |
| Sertraline: trazodone    | 0 | Some concerns | Suspected  | No concerns | Some concerns  | No concerns   | No concerns | Low      |
| Sertraline: venlafaxine  | 0 | Some concerns | Undetected | No concerns | Some concerns  | No concerns   | No concerns | Moderate |

(4) 2005

eTable 6. CINeMA assessment for efficacy in 2005.

| Comparison                 | No. of studies | Within-study bias | Across-studies bias | Indirectness | Imprecision    | Heterogeneity  | Incoherence    | Confidence rating |
|----------------------------|----------------|-------------------|---------------------|--------------|----------------|----------------|----------------|-------------------|
| Agomelatine: paroxetine    | 1              | No concerns       | Undetected          | No concerns  | Major concerns | No concerns    | Major concerns | Low               |
| Agomelatine: venlafaxine   | 2              | Some concerns     | Undetected          | No concerns  | Major concerns | No concerns    | Major concerns | Very low          |
| Amitriptyline: fluoxetine  | 12             | Some concerns     | Suspected           | No concerns  | No concerns    | Some concerns  | No concerns    | Low               |
| Amitriptyline: fluvoxamine | 3              | Some concerns     | Suspected           | No concerns  | No concerns    | Some concerns  | No concerns    | Low               |
| Amitriptyline: milnacipran | 2              | Some concerns     | Suspected           | No concerns  | Some concerns  | Some concerns  | No concerns    | Low               |
| Amitriptyline: paroxetine  | 13             | No concerns       | Suspected           | No concerns  | No concerns    | Major concerns | No concerns    | Low               |
| Amitriptyline: sertraline  | 4              | No concerns       | Suspected           | No concerns  | Some concerns  | Some concerns  | No concerns    | Low               |
| Amitriptyline: trazodone   | 2              | Some concerns     | Suspected           | No concerns  | No concerns    | Some concerns  | No concerns    | Low               |
| Amitriptyline: venlafaxine | 2              | Some concerns     | Suspected           | No concerns  | Some concerns  | Some concerns  | No concerns    | Low               |
| Bupropion: fluoxetine      | 1              | Some concerns     | Undetected          | No concerns  | Some concerns  | Some concerns  | No concerns    | Moderate          |
| Bupropion: paroxetine      | 1              | Some concerns     | Undetected          | No concerns  | Major concerns | No concerns    | No concerns    | Low               |
| Bupropion: sertraline      | 1              | Some concerns     | Undetected          | No concerns  | Major concerns | No concerns    | No concerns    | Low               |
| Bupropion: trazodone       | 1              | Some concerns     | Suspected           | No concerns  | No concerns    | Some concerns  | No concerns    | Low               |
| Citalopram: clomipramine   | 1              | No concerns       | Suspected           | No concerns  | Major concerns | No concerns    | No concerns    | Low               |
| Citalopram: escitalopram   | 1              | No concerns       | Undetected          | No concerns  | Some concerns  | Some concerns  | No concerns    | Moderate          |
| Citalopram: fluoxetine     | 2              | No concerns       | Undetected          | No concerns  | Some concerns  | Some concerns  | No concerns    | Moderate          |
| Citalopram: fluvoxamine    | 1              | No concerns       | Suspected           | No concerns  | Major concerns | No concerns    | No concerns    | Low               |
| Citalopram: mirtazapine    | 1              | No concerns       | Undetected          | No concerns  | Some concerns  | Some concerns  | No concerns    | Moderate          |
| Citalopram: sertraline     | 2              | No concerns       | Undetected          | No concerns  | Some concerns  | Some concerns  | No concerns    | Moderate          |
| Citalopram: venlafaxine    | 1              | Some concerns     | Undetected          | No concerns  | Some concerns  | No concerns    | No concerns    | Moderate          |
| Clomipramine: fluoxetine   | 4              | Some concerns     | Suspected           | No concerns  | Some concerns  | Some concerns  | Major concerns | Very low          |
| Clomipramine: fluvoxamine  | 2              | Some concerns     | Suspected           | No concerns  | Major concerns | No concerns    | No concerns    | Very low          |
| Clomipramine: milnacipran  | 1              | Some concerns     | Suspected           | No concerns  | Some concerns  | Some concerns  | No concerns    | Low               |
| Clomipramine: paroxetine   | 6              | Some concerns     | Suspected           | No concerns  | Some concerns  | No concerns    | No concerns    | Low               |
| Clomipramine: sertraline   | 2              | Some concerns     | Suspected           | No concerns  | Some concerns  | Some concerns  | No concerns    | Low               |
| Clomipramine: trazodone    | 1              | Some concerns     | Suspected           | No concerns  | Some concerns  | Some concerns  | No concerns    | Low               |
| Clomipramine: venlafaxine  | 2              | Some concerns     | Suspected           | No concerns  | Some concerns  | No concerns    | No concerns    | Low               |
| Duloxetine: venlafaxine    | 2              | Some concerns     | Undetected          | No concerns  | Major concerns | No concerns    | No concerns    | Low               |
| Escitalopram: fluoxetine   | 1              | Some concerns     | Undetected          | No concerns  | Some concerns  | No concerns    | No concerns    | Moderate          |
| Escitalopram: sertraline   | 2              | No concerns       | Undetected          | No concerns  | Major concerns | No concerns    | No concerns    | Moderate          |
| Escitalopram: venlafaxine  | 2              | No concerns       | Undetected          | No concerns  | Major concerns | No concerns    | No concerns    | Moderate          |
| Fluoxetine: fluvoxamine    | 2              | Some concerns     | Suspected           | No concerns  | Some concerns  | Some concerns  | No concerns    | Low               |
| Fluoxetine: milnacipran    | 2              | No concerns       | Suspected           | No concerns  | Some concerns  | Some concerns  | No concerns    | Low               |
| Fluoxetine: mirtazapine    | 3              | Some concerns     | Undetected          | No concerns  | No concerns    | Some concerns  | No concerns    | Moderate          |

|                            |   |               |            |             |                |                |               |          |
|----------------------------|---|---------------|------------|-------------|----------------|----------------|---------------|----------|
| Fluoxetine: nefazodone     | 3 | Some concerns | Undetected | No concerns | Major concerns | No concerns    | No concerns   | Low      |
| Fluoxetine: paroxetine     | 9 | Some concerns | Undetected | No concerns | No concerns    | Some concerns  | No concerns   | Moderate |
| Fluoxetine: reboxetine     | 2 | Some concerns | Suspected  | No concerns | Major concerns | No concerns    | No concerns   | Very low |
| Fluoxetine: sertraline     | 6 | Some concerns | Undetected | No concerns | Some concerns  | No concerns    | No concerns   | Moderate |
| Fluoxetine: trazodone      | 4 | Some concerns | Suspected  | No concerns | Some concerns  | Some concerns  | No concerns   | Low      |
| Fluoxetine: venlafaxine    | 6 | Some concerns | Undetected | No concerns | No concerns    | Some concerns  | No concerns   | Moderate |
| Fluvoxamine: milnacipran   | 2 | Some concerns | Suspected  | No concerns | Some concerns  | Some concerns  | No concerns   | Low      |
| Fluvoxamine: mirtazapine   | 2 | No concerns   | Suspected  | No concerns | No concerns    | Some concerns  | No concerns   | Moderate |
| Fluvoxamine: paroxetine    | 2 | Some concerns | Suspected  | No concerns | Some concerns  | No concerns    | No concerns   | Moderate |
| Fluvoxamine: sertraline    | 1 | Some concerns | Suspected  | No concerns | Some concerns  | No concerns    | No concerns   | Moderate |
| Fluvoxamine: venlafaxine   | 1 | Some concerns | Suspected  | No concerns | No concerns    | Some concerns  | No concerns   | Low      |
| Milnacipran: paroxetine    | 1 | Some concerns | Suspected  | No concerns | Some concerns  | Some concerns  | No concerns   | Low      |
| Milnacipran: sertraline    | 1 | Some concerns | Suspected  | No concerns | Major concerns | No concerns    | No concerns   | Very low |
| Mirtazapine: paroxetine    | 5 | No concerns   | Undetected | No concerns | Some concerns  | Some concerns  | No concerns   | Moderate |
| Mirtazapine: sertraline    | 1 | Some concerns | Undetected | No concerns | Some concerns  | Some concerns  | No concerns   | Moderate |
| Mirtazapine: trazodone     | 1 | Some concerns | Suspected  | No concerns | No concerns    | Some concerns  | No concerns   | Low      |
| Mirtazapine: venlafaxine   | 1 | No concerns   | Undetected | No concerns | Some concerns  | Some concerns  | No concerns   | Moderate |
| Nefazodone: paroxetine     | 2 | Some concerns | Undetected | No concerns | Major concerns | No concerns    | No concerns   | Low      |
| Nefazodone: sertraline     | 1 | Some concerns | Undetected | No concerns | Major concerns | No concerns    | No concerns   | Low      |
| Paroxetine: reboxetine     | 1 | Some concerns | Suspected  | No concerns | Some concerns  | Some concerns  | No concerns   | Low      |
| Paroxetine: sertraline     | 2 | Some concerns | Undetected | No concerns | No concerns    | Major concerns | No concerns   | Low      |
| Paroxetine: trazodone      | 1 | Some concerns | Suspected  | No concerns | No concerns    | Some concerns  | No concerns   | Low      |
| Paroxetine: venlafaxine    | 2 | Some concerns | Undetected | No concerns | Some concerns  | Some concerns  | Some concerns | Low      |
| Reboxetine: venlafaxine    | 1 | Some concerns | Suspected  | No concerns | Some concerns  | Some concerns  | No concerns   | Low      |
| Sertraline: venlafaxine    | 3 | Some concerns | Undetected | No concerns | Some concerns  | Some concerns  | No concerns   | Moderate |
| Trazodone: venlafaxine     | 1 | Some concerns | Suspected  | No concerns | No concerns    | Some concerns  | No concerns   | Low      |
| Agomelatine: amitriptyline | 0 | No concerns   | Suspected  | No concerns | Major concerns | No concerns    | No concerns   | Low      |
| Agomelatine: bupropion     | 0 | Some concerns | Undetected | No concerns | Major concerns | No concerns    | No concerns   | Low      |
| Agomelatine: citalopram    | 0 | No concerns   | Undetected | No concerns | Some concerns  | Some concerns  | No concerns   | Moderate |
| Agomelatine: clomipramine  | 0 | Some concerns | Suspected  | No concerns | Some concerns  | Some concerns  | No concerns   | Low      |
| Agomelatine: duloxetine    | 0 | Some concerns | Undetected | No concerns | Major concerns | No concerns    | No concerns   | Low      |
| Agomelatine: escitalopram  | 0 | No concerns   | Undetected | No concerns | Major concerns | No concerns    | No concerns   | Moderate |
| Agomelatine: fluoxetine    | 0 | No concerns   | Undetected | No concerns | Some concerns  | No concerns    | No concerns   | Low      |
| Agomelatine: fluvoxamine   | 0 | No concerns   | Suspected  | No concerns | Some concerns  | Some concerns  | No concerns   | Low      |
| Agomelatine: milnacipran   | 0 | No concerns   | Suspected  | No concerns | Major concerns | No concerns    | No concerns   | Low      |
| Agomelatine: mirtazapine   | 0 | No concerns   | Undetected | No concerns | Major concerns | No concerns    | No concerns   | Moderate |
| Agomelatine: nefazodone    | 0 | Some concerns | Undetected | No concerns | Major concerns | No concerns    | No concerns   | Low      |

|                             |   |               |            |             |                |               |             |          |
|-----------------------------|---|---------------|------------|-------------|----------------|---------------|-------------|----------|
| Agomelatine: reboxetine     | 0 | Some concerns | Suspected  | No concerns | Some concerns  | Some concerns | No concerns | Low      |
| Agomelatine: sertraline     | 0 | No concerns   | Undetected | No concerns | Major concerns | No concerns   | No concerns | Moderate |
| Agomelatine: trazodone      | 0 | Some concerns | Suspected  | No concerns | No concerns    | Some concerns | No concerns | Low      |
| Amitriptyline: bupropion    | 0 | Some concerns | Suspected  | No concerns | Major concerns | No concerns   | No concerns | Very low |
| Amitriptyline: citalopram   | 0 | No concerns   | Suspected  | No concerns | Some concerns  | Some concerns | No concerns | Low      |
| Amitriptyline: clomipramine | 0 | Some concerns | Suspected  | No concerns | Some concerns  | No concerns   | No concerns | Low      |
| Amitriptyline: duloxetine   | 0 | Some concerns | Suspected  | No concerns | Major concerns | No concerns   | No concerns | Very low |
| Amitriptyline: escitalopram | 0 | No concerns   | Suspected  | No concerns | Major concerns | No concerns   | No concerns | Low      |
| Amitriptyline: mirtazapine  | 0 | No concerns   | Suspected  | No concerns | Major concerns | No concerns   | No concerns | Low      |
| Amitriptyline: nefazodone   | 0 | Some concerns | Suspected  | No concerns | Major concerns | No concerns   | No concerns | Very low |
| Amitriptyline: reboxetine   | 0 | Some concerns | Suspected  | No concerns | Some concerns  | Some concerns | No concerns | Low      |
| Bupropion: citalopram       | 0 | Some concerns | Undetected | No concerns | Major concerns | No concerns   | No concerns | Low      |
| Bupropion: clomipramine     | 0 | Some concerns | Suspected  | No concerns | Some concerns  | Some concerns | No concerns | Low      |
| Bupropion: duloxetine       | 0 | Some concerns | Undetected | No concerns | Major concerns | No concerns   | No concerns | Low      |
| Bupropion: escitalopram     | 0 | Some concerns | Undetected | No concerns | Major concerns | No concerns   | No concerns | Low      |
| Bupropion: fluvoxamine      | 0 | Some concerns | Suspected  | No concerns | Some concerns  | Some concerns | No concerns | Low      |
| Bupropion: milnacipran      | 0 | Some concerns | Suspected  | No concerns | Major concerns | No concerns   | No concerns | Very low |
| Bupropion: mirtazapine      | 0 | Some concerns | Undetected | No concerns | Major concerns | No concerns   | No concerns | Low      |
| Bupropion: nefazodone       | 0 | Some concerns | Undetected | No concerns | Major concerns | No concerns   | No concerns | Low      |
| Bupropion: reboxetine       | 0 | Some concerns | Suspected  | No concerns | Major concerns | No concerns   | No concerns | Very low |
| Bupropion: venlafaxine      | 0 | Some concerns | Undetected | No concerns | Major concerns | No concerns   | No concerns | Low      |
| Citalopram: duloxetine      | 0 | Some concerns | Undetected | No concerns | Major concerns | No concerns   | No concerns | Low      |
| Citalopram: milnacipran     | 0 | No concerns   | Suspected  | No concerns | Major concerns | No concerns   | No concerns | Low      |
| Citalopram: nefazodone      | 0 | Some concerns | Undetected | No concerns | Major concerns | No concerns   | No concerns | Low      |
| Citalopram: paroxetine      | 0 | No concerns   | Undetected | No concerns | Some concerns  | Some concerns | No concerns | Moderate |
| Citalopram: reboxetine      | 0 | Some concerns | Suspected  | No concerns | Major concerns | No concerns   | No concerns | Very low |
| Citalopram: trazodone       | 0 | Some concerns | Suspected  | No concerns | Some concerns  | Some concerns | No concerns | Low      |
| Clomipramine: duloxetine    | 0 | Some concerns | Suspected  | No concerns | Major concerns | No concerns   | No concerns | Very low |
| Clomipramine: escitalopram  | 0 | Some concerns | Suspected  | No concerns | Some concerns  | Some concerns | No concerns | Low      |
| Clomipramine: mirtazapine   | 0 | Some concerns | Suspected  | No concerns | Some concerns  | No concerns   | No concerns | Low      |
| Clomipramine: nefazodone    | 0 | Some concerns | Suspected  | No concerns | Major concerns | No concerns   | No concerns | Very low |
| Clomipramine: reboxetine    | 0 | Some concerns | Suspected  | No concerns | Major concerns | No concerns   | No concerns | Very low |
| Duloxetine: escitalopram    | 0 | No concerns   | Undetected | No concerns | Major concerns | No concerns   | No concerns | Moderate |
| Duloxetine: fluoxetine      | 0 | Some concerns | Undetected | No concerns | Major concerns | No concerns   | No concerns | Low      |
| Duloxetine: fluvoxamine     | 0 | Some concerns | Suspected  | No concerns | Major concerns | No concerns   | No concerns | Very low |
| Duloxetine: milnacipran     | 0 | Some concerns | Undetected | No concerns | Major concerns | No concerns   | No concerns | Low      |
| Duloxetine: mirtazapine     | 0 | Some concerns | Undetected | No concerns | Major concerns | No concerns   | No concerns | Low      |

|                           |   |               |            |             |                |               |             |          |
|---------------------------|---|---------------|------------|-------------|----------------|---------------|-------------|----------|
| Duloxetine: nefazodone    | 0 | Some concerns | Undetected | No concerns | Major concerns | No concerns   | No concerns | Low      |
| Duloxetine: paroxetine    | 0 | Some concerns | Undetected | No concerns | Major concerns | No concerns   | No concerns | Low      |
| Duloxetine: reboxetine    | 0 | Some concerns | Suspected  | No concerns | Major concerns | No concerns   | No concerns | Very low |
| Duloxetine: sertraline    | 0 | Some concerns | Undetected | No concerns | Major concerns | No concerns   | No concerns | Low      |
| Duloxetine: trazodone     | 0 | Some concerns | Suspected  | No concerns | Some concerns  | Some concerns | No concerns | Low      |
| Escitalopram: fluvoxamine | 0 | No concerns   | Suspected  | No concerns | Some concerns  | Some concerns | No concerns | Low      |
| Escitalopram: milnacipran | 0 | No concerns   | Suspected  | No concerns | Major concerns | No concerns   | No concerns | Low      |
| Escitalopram: mirtazapine | 0 | No concerns   | Undetected | No concerns | Major concerns | No concerns   | No concerns | Moderate |
| Escitalopram: nefazodone  | 0 | Some concerns | Undetected | No concerns | Major concerns | No concerns   | No concerns | Low      |
| Escitalopram: paroxetine  | 0 | No concerns   | Undetected | No concerns | Major concerns | No concerns   | No concerns | Moderate |
| Escitalopram: reboxetine  | 0 | Some concerns | Suspected  | No concerns | Some concerns  | Some concerns | No concerns | Low      |
| Escitalopram: trazodone   | 0 | Some concerns | Suspected  | No concerns | No concerns    | Some concerns | No concerns | Low      |
| Fluvoxamine: nefazodone   | 0 | Some concerns | Suspected  | No concerns | Major concerns | No concerns   | No concerns | Very low |
| Fluvoxamine: reboxetine   | 0 | Some concerns | Suspected  | No concerns | Major concerns | No concerns   | No concerns | Very low |
| Fluvoxamine: trazodone    | 0 | Some concerns | Suspected  | No concerns | Some concerns  | Some concerns | No concerns | Low      |
| Milnacipran: mirtazapine  | 0 | No concerns   | Suspected  | No concerns | Some concerns  | Some concerns | No concerns | Low      |
| Milnacipran: nefazodone   | 0 | Some concerns | Suspected  | No concerns | Major concerns | No concerns   | No concerns | Very low |
| Milnacipran: reboxetine   | 0 | Some concerns | Suspected  | No concerns | Major concerns | No concerns   | No concerns | Very low |
| Milnacipran: trazodone    | 0 | Some concerns | Suspected  | No concerns | Some concerns  | No concerns   | No concerns | Low      |
| Milnacipran: venlafaxine  | 0 | Some concerns | Suspected  | No concerns | Some concerns  | Some concerns | No concerns | Low      |
| Mirtazapine: nefazodone   | 0 | Some concerns | Undetected | No concerns | Major concerns | No concerns   | No concerns | Low      |
| Mirtazapine: reboxetine   | 0 | Some concerns | Suspected  | No concerns | Some concerns  | Some concerns | No concerns | Low      |
| Nefazodone: reboxetine    | 0 | Some concerns | Suspected  | No concerns | Major concerns | No concerns   | No concerns | Very low |
| Nefazodone: trazodone     | 0 | Some concerns | Suspected  | No concerns | Some concerns  | Some concerns | No concerns | Low      |
| Nefazodone: venlafaxine   | 0 | Some concerns | Undetected | No concerns | Some concerns  | Some concerns | No concerns | Moderate |
| Reboxetine: sertraline    | 0 | Some concerns | Suspected  | No concerns | Some concerns  | Some concerns | No concerns | Low      |
| Reboxetine: trazodone     | 0 | Some concerns | Suspected  | No concerns | Major concerns | No concerns   | No concerns | Very low |
| Sertraline: trazodone     | 0 | Some concerns | Suspected  | No concerns | No concerns    | Some concerns | No concerns | Low      |

(5) 2010

eTable 7. CINeMA assessment for efficacy in 2010.

| Comparison                 | No. of studies | Within-study bias | Across-studies bias | Indirectness | Imprecision    | Heterogeneity  | Incoherence    | Confidence rating |
|----------------------------|----------------|-------------------|---------------------|--------------|----------------|----------------|----------------|-------------------|
| Agomelatine: escitalopram  | 2              | No concerns       | Undetected          | No concerns  | Some concerns  | Some concerns  | No concerns    | Moderate          |
| Agomelatine: fluoxetine    | 2              | No concerns       | Undetected          | No concerns  | No concerns    | Some concerns  | No concerns    | High              |
| Agomelatine: paroxetine    | 2              | No concerns       | Undetected          | No concerns  | Some concerns  | Some concerns  | No concerns    | Moderate          |
| Agomelatine: venlafaxine   | 2              | No concerns       | Undetected          | No concerns  | Some concerns  | Some concerns  | No concerns    | Moderate          |
| Amitriptyline: fluoxetine  | 12             | Some concerns     | Suspected           | No concerns  | No concerns    | Some concerns  | No concerns    | Low               |
| Amitriptyline: fluvoxamine | 3              | No concerns       | Suspected           | No concerns  | Some concerns  | No concerns    | No concerns    | Moderate          |
| Amitriptyline: milnacipran | 2              | Some concerns     | Suspected           | No concerns  | Some concerns  | Some concerns  | No concerns    | Low               |
| Amitriptyline: paroxetine  | 13             | No concerns       | Suspected           | No concerns  | No concerns    | Major concerns | No concerns    | Low               |
| Amitriptyline: sertraline  | 4              | No concerns       | Suspected           | No concerns  | Some concerns  | Some concerns  | No concerns    | Low               |
| Amitriptyline: trazodone   | 2              | Some concerns     | Suspected           | No concerns  | No concerns    | Some concerns  | No concerns    | Low               |
| Amitriptyline: venlafaxine | 2              | Some concerns     | Suspected           | No concerns  | Some concerns  | Some concerns  | No concerns    | Low               |
| Bupropion: fluoxetine      | 1              | Some concerns     | Undetected          | No concerns  | Some concerns  | No concerns    | No concerns    | Moderate          |
| Bupropion: paroxetine      | 1              | Some concerns     | Undetected          | No concerns  | Some concerns  | Some concerns  | No concerns    | Moderate          |
| Bupropion: sertraline      | 1              | Some concerns     | Undetected          | No concerns  | Some concerns  | Some concerns  | No concerns    | Moderate          |
| Bupropion: trazodone       | 1              | Some concerns     | Suspected           | No concerns  | No concerns    | Some concerns  | No concerns    | Low               |
| Bupropion: venlafaxine     | 1              | Some concerns     | Undetected          | No concerns  | Some concerns  | Some concerns  | No concerns    | Moderate          |
| Citalopram: clomipramine   | 1              | No concerns       | Suspected           | No concerns  | Major concerns | No concerns    | No concerns    | Low               |
| Citalopram: escitalopram   | 7              | No concerns       | Undetected          | No concerns  | No concerns    | Some concerns  | No concerns    | High              |
| Citalopram: fluoxetine     | 2              | No concerns       | Undetected          | No concerns  | Some concerns  | Some concerns  | No concerns    | Moderate          |
| Citalopram: fluvoxamine    | 1              | No concerns       | Suspected           | No concerns  | Major concerns | No concerns    | No concerns    | Low               |
| Citalopram: mirtazapine    | 1              | No concerns       | Undetected          | No concerns  | No concerns    | Some concerns  | No concerns    | High              |
| Citalopram: reboxetine     | 1              | Some concerns     | Undetected          | No concerns  | Some concerns  | Some concerns  | Some concerns  | Low               |
| Citalopram: sertraline     | 2              | No concerns       | Undetected          | No concerns  | Some concerns  | Some concerns  | No concerns    | Moderate          |
| Citalopram: venlafaxine    | 1              | No concerns       | Undetected          | No concerns  | Some concerns  | No concerns    | No concerns    | High              |
| Clomipramine: fluoxetine   | 4              | Some concerns     | Suspected           | No concerns  | No concerns    | Major concerns | Major concerns | Very low          |
| Clomipramine: fluvoxamine  | 2              | Some concerns     | Suspected           | No concerns  | Major concerns | No concerns    | No concerns    | Very low          |
| Clomipramine: milnacipran  | 1              | Some concerns     | Suspected           | No concerns  | Some concerns  | Some concerns  | No concerns    | Low               |
| Clomipramine: paroxetine   | 6              | Some concerns     | Suspected           | No concerns  | Some concerns  | No concerns    | No concerns    | Low               |
| Clomipramine: sertraline   | 2              | Some concerns     | Suspected           | No concerns  | Some concerns  | Some concerns  | No concerns    | Low               |
| Clomipramine:trazodone     | 1              | Some concerns     | Suspected           | No concerns  | Some concerns  | Some concerns  | No concerns    | Low               |
| Clomipramine: venlafaxine  | 2              | Some concerns     | Suspected           | No concerns  | Some concerns  | No concerns    | No concerns    | Low               |
| Duloxetine: escitalopram   | 2              | No concerns       | Undetected          | No concerns  | No concerns    | Some concerns  | No concerns    | High              |
| Duloxetine: paroxetine     | 1              | Some concerns     | Undetected          | No concerns  | Some concerns  | No concerns    | No concerns    | Moderate          |
| Duloxetine: venlafaxine    | 2              | Some concerns     | Undetected          | No concerns  | Some concerns  | Some concerns  | No concerns    | Moderate          |



|                            |   |               |            |             |                |                |                |          |
|----------------------------|---|---------------|------------|-------------|----------------|----------------|----------------|----------|
| Escitalopram: fluoxetine   | 2 | No concerns   | Undetected | No concerns | No concerns    | Some concerns  | No concerns    | High     |
| Escitalopram: paroxetine   | 2 | No concerns   | Undetected | No concerns | Some concerns  | Some concerns  | No concerns    | Moderate |
| Escitalopram: sertraline   | 2 | No concerns   | Undetected | No concerns | Some concerns  | No concerns    | No concerns    | High     |
| Escitalopram: venlafaxine  | 2 | No concerns   | Undetected | No concerns | Some concerns  | Some concerns  | No concerns    | Moderate |
| Fluoxetine: fluvoxamine    | 2 | Some concerns | Suspected  | No concerns | Some concerns  | Some concerns  | No concerns    | Low      |
| Fluoxetine: milnacipran    | 2 | No concerns   | Suspected  | No concerns | Some concerns  | Some concerns  | No concerns    | Low      |
| Fluoxetine: mirtazapine    | 5 | No concerns   | Undetected | No concerns | No concerns    | Some concerns  | No concerns    | High     |
| Fluoxetine: nefazodone     | 3 | Some concerns | Undetected | No concerns | Major concerns | No concerns    | No concerns    | Low      |
| Fluoxetine: paroxetine     | 9 | No concerns   | Undetected | No concerns | No concerns    | Some concerns  | No concerns    | High     |
| Fluoxetine: reboxetine     | 2 | Some concerns | Undetected | No concerns | Some concerns  | Some concerns  | No concerns    | Moderate |
| Fluoxetine: sertraline     | 6 | Some concerns | Undetected | No concerns | Some concerns  | Some concerns  | Some concerns  | Low      |
| Fluoxetine: trazodone      | 4 | Some concerns | Suspected  | No concerns | Some concerns  | Some concerns  | No concerns    | Low      |
| Fluoxetine: venlafaxine    | 8 | Some concerns | Undetected | No concerns | No concerns    | Some concerns  | No concerns    | Moderate |
| Fluvoxamine: milnacipran   | 2 | Some concerns | Suspected  | No concerns | Some concerns  | Some concerns  | No concerns    | Low      |
| Fluvoxamine: mirtazapine   | 2 | No concerns   | Suspected  | No concerns | No concerns    | Some concerns  | No concerns    | Moderate |
| Fluvoxamine: paroxetine    | 2 | Some concerns | Suspected  | No concerns | Some concerns  | No concerns    | No concerns    | Low      |
| Fluvoxamine: sertraline    | 2 | No concerns   | Suspected  | No concerns | Some concerns  | Some concerns  | Major concerns | Very low |
| Fluvoxamine: venlafaxine   | 1 | Some concerns | Suspected  | No concerns | Some concerns  | No concerns    | No concerns    | Low      |
| Milnacipran: paroxetine    | 1 | Some concerns | Suspected  | No concerns | Some concerns  | Some concerns  | No concerns    | Low      |
| Milnacipran: sertraline    | 1 | No concerns   | Suspected  | No concerns | Major concerns | No concerns    | No concerns    | Low      |
| Mirtazapine: paroxetine    | 5 | No concerns   | Undetected | No concerns | Some concerns  | Some concerns  | No concerns    | Moderate |
| Mirtazapine: sertraline    | 1 | No concerns   | Undetected | No concerns | Some concerns  | Some concerns  | No concerns    | Moderate |
| Mirtazapine: trazodone     | 1 | Some concerns | Suspected  | No concerns | No concerns    | Some concerns  | No concerns    | Low      |
| Mirtazapine: venlafaxine   | 2 | No concerns   | Undetected | No concerns | Some concerns  | Some concerns  | No concerns    | Moderate |
| Nefazodone: paroxetine     | 2 | Some concerns | Undetected | No concerns | Major concerns | No concerns    | No concerns    | Low      |
| Nefazodone: sertraline     | 1 | Some concerns | Undetected | No concerns | Major concerns | No concerns    | No concerns    | Low      |
| Paroxetine: reboxetine     | 1 | Some concerns | Undetected | No concerns | No concerns    | Some concerns  | No concerns    | Moderate |
| Paroxetine: sertraline     | 2 | No concerns   | Undetected | No concerns | Some concerns  | Some concerns  | No concerns    | Moderate |
| Paroxetine: trazodone      | 2 | Some concerns | Suspected  | No concerns | No concerns    | Some concerns  | No concerns    | Low      |
| Paroxetine: venlafaxine    | 2 | Some concerns | Undetected | No concerns | No concerns    | Major concerns | Major concerns | Very low |
| Reboxetine: venlafaxine    | 1 | Some concerns | Undetected | No concerns | No concerns    | Some concerns  | No concerns    | Moderate |
| Sertraline: trazodone      | 1 | Some concerns | Suspected  | No concerns | Some concerns  | No concerns    | Some concerns  | Low      |
| Sertraline: venlafaxine    | 3 | Some concerns | Undetected | No concerns | Some concerns  | Some concerns  | No concerns    | Low      |
| Trazodone: venlafaxine     | 1 | Some concerns | Suspected  | No concerns | No concerns    | Some concerns  | No concerns    | Low      |
| Agomelatine: amitriptyline | 0 | No concerns   | Suspected  | No concerns | Major concerns | No concerns    | No concerns    | Low      |
| Agomelatine: bupropion     | 0 | Some concerns | Undetected | No concerns | Major concerns | No concerns    | No concerns    | Low      |
| Agomelatine: citalopram    | 0 | No concerns   | Undetected | No concerns | Some concerns  | No concerns    | No concerns    | High     |

|                             |   |               |            |             |                |               |             |          |
|-----------------------------|---|---------------|------------|-------------|----------------|---------------|-------------|----------|
| Agomelatine:clomipramine    | 0 | No concerns   | Suspected  | No concerns | Some concerns  | No concerns   | No concerns | Moderate |
| Agomelatine: duloxetine     | 0 | No concerns   | Undetected | No concerns | Some concerns  | No concerns   | No concerns | High     |
| Agomelatine: fluvoxamine    | 0 | No concerns   | Suspected  | No concerns | Some concerns  | No concerns   | No concerns | Moderate |
| Agomelatine: milnacipran    | 0 | No concerns   | Suspected  | No concerns | Some concerns  | Some concerns | No concerns | Low      |
| Agomelatine: mirtazapine    | 0 | No concerns   | Undetected | No concerns | Major concerns | No concerns   | No concerns | Moderate |
| Agomelatine: nefazodone     | 0 | No concerns   | Undetected | No concerns | Major concerns | No concerns   | No concerns | Moderate |
| Agomelatine: reboxetine     | 0 | No concerns   | Undetected | No concerns | No concerns    | Some concerns | No concerns | High     |
| Agomelatine: sertraline     | 0 | No concerns   | Undetected | No concerns | Some concerns  | Some concerns | No concerns | Moderate |
| Agomelatine: trazodone      | 0 | No concerns   | Suspected  | No concerns | No concerns    | Some concerns | No concerns | Moderate |
| Amitriptyline: bupropion    | 0 | Some concerns | Suspected  | No concerns | Major concerns | No concerns   | No concerns | Very low |
| Amitriptyline: citalopram   | 0 | No concerns   | Suspected  | No concerns | No concerns    | Some concerns | No concerns | Moderate |
| Amitriptyline: clomipramine | 0 | Some concerns | Suspected  | No concerns | Some concerns  | No concerns   | No concerns | Low      |
| Amitriptyline: duloxetine   | 0 | Some concerns | Suspected  | No concerns | Some concerns  | No concerns   | No concerns | Low      |
| Amitriptyline: escitalopram | 0 | No concerns   | Suspected  | No concerns | Some concerns  | Some concerns | No concerns | Low      |
| Amitriptyline: mirtazapine  | 0 | No concerns   | Suspected  | No concerns | Some concerns  | Some concerns | No concerns | Low      |
| Amitriptyline: nefazodone   | 0 | Some concerns | Suspected  | No concerns | Major concerns | No concerns   | No concerns | Very low |
| Amitriptyline: reboxetine   | 0 | Some concerns | Suspected  | No concerns | No concerns    | Some concerns | No concerns | Low      |
| Bupropion: citalopram       | 0 | Some concerns | Undetected | No concerns | Some concerns  | No concerns   | No concerns | Moderate |
| Bupropion: clomipramine     | 0 | Some concerns | Suspected  | No concerns | Some concerns  | No concerns   | No concerns | Low      |
| Bupropion: duloxetine       | 0 | Some concerns | Undetected | No concerns | Some concerns  | No concerns   | No concerns | Moderate |
| Bupropion: escitalopram     | 0 | Some concerns | Undetected | No concerns | Major concerns | No concerns   | No concerns | Low      |
| Bupropion: fluvoxamine      | 0 | Some concerns | Suspected  | No concerns | Some concerns  | No concerns   | No concerns | Low      |
| Bupropion: milnacipran      | 0 | Some concerns | Suspected  | No concerns | Some concerns  | Some concerns | No concerns | Low      |
| Bupropion: mirtazapine      | 0 | Some concerns | Undetected | No concerns | Major concerns | No concerns   | No concerns | Low      |
| Bupropion: nefazodone       | 0 | Some concerns | Undetected | No concerns | Major concerns | No concerns   | No concerns | Low      |
| Bupropion: reboxetine       | 0 | Some concerns | Undetected | No concerns | No concerns    | Some concerns | No concerns | Moderate |
| Citalopram: duloxetine      | 0 | No concerns   | Undetected | No concerns | Major concerns | No concerns   | No concerns | Moderate |
| Citalopram: milnacipran     | 0 | No concerns   | Suspected  | No concerns | Some concerns  | Some concerns | No concerns | Low      |
| Citalopram: nefazodone      | 0 | Some concerns | Undetected | No concerns | Major concerns | No concerns   | No concerns | Low      |
| Citalopram: paroxetine      | 0 | No concerns   | Undetected | No concerns | Some concerns  | No concerns   | No concerns | High     |
| Citalopram: trazodone       | 0 | No concerns   | Suspected  | No concerns | Major concerns | No concerns   | No concerns | Low      |
| Clomipramine: duloxetine    | 0 | Some concerns | Suspected  | No concerns | Major concerns | No concerns   | No concerns | Very low |
| Clomipramine: escitalopram  | 0 | No concerns   | Suspected  | No concerns | No concerns    | Some concerns | No concerns | Moderate |
| Clomipramine: mirtazapine   | 0 | Some concerns | Suspected  | No concerns | Some concerns  | No concerns   | No concerns | Low      |
| Clomipramine: nefazodone    | 0 | Some concerns | Suspected  | No concerns | Major concerns | No concerns   | No concerns | Very low |
| Clomipramine: reboxetine    | 0 | Some concerns | Suspected  | No concerns | Some concerns  | Some concerns | No concerns | Low      |
| Duloxetine: fluoxetine      | 0 | Some concerns | Undetected | No concerns | Major concerns | No concerns   | No concerns | Low      |

|                           |   |               |            |             |                |               |             |          |
|---------------------------|---|---------------|------------|-------------|----------------|---------------|-------------|----------|
| Duloxetine: fluvoxamine   | 0 | Some concerns | Suspected  | No concerns | Major concerns | No concerns   | No concerns | Very low |
| Duloxetine: milnacipran   | 0 | Some concerns | Suspected  | No concerns | Major concerns | No concerns   | No concerns | Very low |
| Duloxetine: mirtazapine   | 0 | No concerns   | Undetected | No concerns | Some concerns  | No concerns   | No concerns | High     |
| Duloxetine: nefazodone    | 0 | Some concerns | Undetected | No concerns | Major concerns | No concerns   | No concerns | Low      |
| Duloxetine: reboxetine    | 0 | Some concerns | Undetected | No concerns | Some concerns  | Some concerns | No concerns | Moderate |
| Duloxetine: sertraline    | 0 | Some concerns | Undetected | No concerns | Some concerns  | Some concerns | No concerns | Moderate |
| Duloxetine: trazodone     | 0 | Some concerns | Suspected  | No concerns | Major concerns | No concerns   | No concerns | Very low |
| Escitalopram: fluvoxamine | 0 | No concerns   | Suspected  | No concerns | No concerns    | Some concerns | No concerns | Moderate |
| Escitalopram: milnacipran | 0 | No concerns   | Suspected  | No concerns | Some concerns  | Some concerns | No concerns | Low      |
| Escitalopram: mirtazapine | 0 | No concerns   | Undetected | No concerns | Some concerns  | Some concerns | No concerns | Moderate |
| Escitalopram: nefazodone  | 0 | No concerns   | Undetected | No concerns | Some concerns  | Some concerns | No concerns | Moderate |
| Escitalopram: reboxetine  | 0 | Some concerns | Undetected | No concerns | No concerns    | No concerns   | No concerns | Moderate |
| Escitalopram: trazodone   | 0 | No concerns   | Suspected  | No concerns | No concerns    | Some concerns | No concerns | Moderate |
| Fluvoxamine: nefazodone   | 0 | Some concerns | Suspected  | No concerns | Major concerns | No concerns   | No concerns | Very low |
| Fluvoxamine: reboxetine   | 0 | Some concerns | Suspected  | No concerns | Some concerns  | Some concerns | No concerns | Low      |
| Fluvoxamine: trazodone    | 0 | Some concerns | Suspected  | No concerns | Some concerns  | Some concerns | No concerns | Low      |
| Milnacipran: mirtazapine  | 0 | No concerns   | Suspected  | No concerns | Some concerns  | Some concerns | No concerns | Low      |
| Milnacipran: nefazodone   | 0 | Some concerns | Suspected  | No concerns | Major concerns | No concerns   | No concerns | Very low |
| Milnacipran: reboxetine   | 0 | Some concerns | Suspected  | No concerns | Some concerns  | No concerns   | No concerns | Low      |
| Milnacipran: trazodone    | 0 | Some concerns | Suspected  | No concerns | Some concerns  | Some concerns | No concerns | Low      |
| Milnacipran: venlafaxine  | 0 | Some concerns | Suspected  | No concerns | Some concerns  | Some concerns | No concerns | Low      |
| Mirtazapine: nefazodone   | 0 | Some concerns | Undetected | No concerns | Some concerns  | Some concerns | No concerns | Moderate |
| Mirtazapine: reboxetine   | 0 | Some concerns | Undetected | No concerns | No concerns    | Some concerns | No concerns | Moderate |
| Nefazodone: reboxetine    | 0 | Some concerns | Undetected | No concerns | Some concerns  | Some concerns | No concerns | Moderate |
| Nefazodone: trazodone     | 0 | Some concerns | Suspected  | No concerns | Major concerns | No concerns   | No concerns | Very low |
| Nefazodone: venlafaxine   | 0 | Some concerns | Undetected | No concerns | Major concerns | No concerns   | No concerns | Low      |
| Reboxetine: sertraline    | 0 | Some concerns | Undetected | No concerns | Some concerns  | No concerns   | No concerns | Moderate |
| Reboxetine: trazodone     | 0 | Some concerns | Suspected  | No concerns | Major concerns | No concerns   | No concerns | Very low |

(6) 2016

eTable 8. CINeMA assessment for efficacy in 2016.

| Comparison                 | No. of studies | Within-study bias | Across-studies bias | Indirectness | Imprecision    | Heterogeneity  | Incoherence    | Confidence rating |
|----------------------------|----------------|-------------------|---------------------|--------------|----------------|----------------|----------------|-------------------|
| Agomelatine: duloxetine    | 1              | No concerns       | Undetected          | No concerns  | Some concerns  | Some concerns  | No concerns    | Moderate          |
| Agomelatine: escitalopram  | 2              | No concerns       | Undetected          | No concerns  | Some concerns  | Some concerns  | No concerns    | Moderate          |
| Agomelatine: fluoxetine    | 2              | No concerns       | Undetected          | No concerns  | Some concerns  | Some concerns  | No concerns    | Moderate          |
| Agomelatine: paroxetine    | 2              | No concerns       | Undetected          | No concerns  | Some concerns  | Some concerns  | No concerns    | Moderate          |
| Agomelatine: venlafaxine   | 2              | No concerns       | Undetected          | No concerns  | Some concerns  | Some concerns  | No concerns    | Moderate          |
| Amitriptyline: fluoxetine  | 12             | Some concerns     | Suspected           | No concerns  | No concerns    | Some concerns  | No concerns    | Low               |
| Amitriptyline: fluvoxamine | 3              | No concerns       | Suspected           | No concerns  | Some concerns  | No concerns    | No concerns    | Moderate          |
| Amitriptyline: milnacipran | 2              | No concerns       | Suspected           | No concerns  | Some concerns  | Some concerns  | No concerns    | Low               |
| Amitriptyline: paroxetine  | 13             | No concerns       | Suspected           | No concerns  | No concerns    | Major concerns | No concerns    | Low               |
| Amitriptyline: sertraline  | 4              | No concerns       | Suspected           | No concerns  | Some concerns  | Some concerns  | No concerns    | Low               |
| Amitriptyline: trazodone   | 2              | Some concerns     | Suspected           | No concerns  | No concerns    | Some concerns  | No concerns    | Low               |
| Amitriptyline: venlafaxine | 2              | Some concerns     | Suspected           | No concerns  | Some concerns  | Some concerns  | No concerns    | Low               |
| Bupropion: fluoxetine      | 1              | Some concerns     | Undetected          | No concerns  | Some concerns  | No concerns    | No concerns    | Moderate          |
| Bupropion: paroxetine      | 1              | Some concerns     | Undetected          | No concerns  | Some concerns  | Some concerns  | No concerns    | Moderate          |
| Bupropion: sertraline      | 1              | Some concerns     | Undetected          | No concerns  | Some concerns  | Some concerns  | No concerns    | Moderate          |
| Bupropion: trazodone       | 1              | Some concerns     | Suspected           | No concerns  | No concerns    | Some concerns  | No concerns    | Low               |
| Bupropion: venlafaxine     | 1              | Some concerns     | Undetected          | No concerns  | Some concerns  | Some concerns  | No concerns    | Moderate          |
| Citalopram: clomipramine   | 1              | No concerns       | Suspected           | No concerns  | Some concerns  | Some concerns  | No concerns    | Low               |
| Citalopram: escitalopram   | 10             | No concerns       | Undetected          | No concerns  | No concerns    | Some concerns  | No concerns    | High              |
| Citalopram: fluoxetine     | 2              | No concerns       | Undetected          | No concerns  | Some concerns  | Some concerns  | No concerns    | Moderate          |
| Citalopram: fluvoxamine    | 1              | No concerns       | Suspected           | No concerns  | Some concerns  | Some concerns  | No concerns    | Low               |
| Citalopram: mirtazapine    | 1              | No concerns       | Undetected          | No concerns  | Some concerns  | Some concerns  | No concerns    | Moderate          |
| Citalopram: reboxetine     | 1              | Some concerns     | Suspected           | No concerns  | Some concerns  | Some concerns  | No concerns    | Low               |
| Citalopram: sertraline     | 3              | No concerns       | Undetected          | No concerns  | Some concerns  | Some concerns  | No concerns    | Moderate          |
| Citalopram: venlafaxine    | 2              | No concerns       | Undetected          | No concerns  | Some concerns  | Some concerns  | Major concerns | Low               |
| Clomipramine: fluoxetine   | 4              | Some concerns     | Suspected           | No concerns  | No concerns    | Major concerns | Major concerns | Very low          |
| Clomipramine: fluvoxamine  | 2              | Some concerns     | Suspected           | No concerns  | Major concerns | No concerns    | No concerns    | Very low          |
| Clomipramine: milnacipran  | 1              | Some concerns     | Suspected           | No concerns  | Some concerns  | Some concerns  | No concerns    | Low               |
| Clomipramine: paroxetine   | 6              | Some concerns     | Suspected           | No concerns  | Some concerns  | Some concerns  | No concerns    | Low               |
| Clomipramine: sertraline   | 2              | Some concerns     | Suspected           | No concerns  | Some concerns  | Some concerns  | No concerns    | Low               |
| Clomipramine: trazodone    | 1              | Some concerns     | Suspected           | No concerns  | Some concerns  | Some concerns  | No concerns    | Low               |
| Clomipramine: venlafaxine  | 2              | Some concerns     | Suspected           | No concerns  | Some concerns  | Some concerns  | No concerns    | Low               |
| Duloxetine: escitalopram   | 2              | No concerns       | Undetected          | No concerns  | Some concerns  | Some concerns  | No concerns    | Moderate          |
| Duloxetine: paroxetine     | 2              | Some concerns     | Undetected          | No concerns  | Some concerns  | Some concerns  | No concerns    | Moderate          |

|                            |   |               |            |             |                |                |                |          |
|----------------------------|---|---------------|------------|-------------|----------------|----------------|----------------|----------|
| Duloxetine: venlafaxine    | 2 | Some concerns | Undetected | No concerns | Some concerns  | Some concerns  | No concerns    | Moderate |
| Escitalopram: fluoxetine   | 2 | No concerns   | Undetected | No concerns | No concerns    | Some concerns  | No concerns    | High     |
| Escitalopram: paroxetine   | 2 | No concerns   | Undetected | No concerns | Some concerns  | Some concerns  | No concerns    | Moderate |
| Escitalopram: sertraline   | 2 | No concerns   | Undetected | No concerns | Some concerns  | Some concerns  | No concerns    | Moderate |
| Escitalopram: venlafaxine  | 2 | No concerns   | Undetected | No concerns | Some concerns  | Some concerns  | No concerns    | Moderate |
| Fluoxetine: fluvoxamine    | 2 | Some concerns | Suspected  | No concerns | Some concerns  | Some concerns  | No concerns    | Low      |
| Fluoxetine: milnacipran    | 2 | No concerns   | Suspected  | No concerns | Some concerns  | Some concerns  | No concerns    | Low      |
| Fluoxetine: mirtazapine    | 5 | No concerns   | Undetected | No concerns | No concerns    | Some concerns  | No concerns    | High     |
| Fluoxetine: nefazodone     | 3 | Some concerns | Undetected | No concerns | Major concerns | No concerns    | No concerns    | Low      |
| Fluoxetine: paroxetine     | 9 | No concerns   | Undetected | No concerns | No concerns    | Some concerns  | No concerns    | High     |
| Fluoxetine: reboxetine     | 2 | Some concerns | Suspected  | No concerns | Some concerns  | Some concerns  | No concerns    | Low      |
| Fluoxetine: sertraline     | 6 | Some concerns | Undetected | No concerns | Some concerns  | Some concerns  | Major concerns | Low      |
| Fluoxetine: trazodone      | 4 | Some concerns | Suspected  | No concerns | Some concerns  | Some concerns  | No concerns    | Low      |
| Fluoxetine: venlafaxine    | 9 | Some concerns | Undetected | No concerns | No concerns    | Some concerns  | No concerns    | Moderate |
| Fluvoxamine: milnacipran   | 2 | Some concerns | Suspected  | No concerns | Some concerns  | Some concerns  | No concerns    | Low      |
| Fluvoxamine: mirtazapine   | 2 | No concerns   | Suspected  | No concerns | Some concerns  | No concerns    | No concerns    | Moderate |
| Fluvoxamine: paroxetine    | 2 | Some concerns | Suspected  | No concerns | Some concerns  | Some concerns  | No concerns    | Low      |
| Fluvoxamine: sertraline    | 2 | No concerns   | Suspected  | No concerns | Some concerns  | Some concerns  | Major concerns | Very low |
| Fluvoxamine: venlafaxine   | 1 | Some concerns | Suspected  | No concerns | Some concerns  | Some concerns  | No concerns    | Low      |
| Milnacipran: paroxetine    | 2 | No concerns   | Suspected  | No concerns | Some concerns  | Some concerns  | No concerns    | Low      |
| Milnacipran: sertraline    | 1 | No concerns   | Suspected  | No concerns | Major concerns | No concerns    | No concerns    | Low      |
| Mirtazapine: paroxetine    | 5 | No concerns   | Undetected | No concerns | Some concerns  | Some concerns  | No concerns    | Moderate |
| Mirtazapine: sertraline    | 1 | No concerns   | Undetected | No concerns | Some concerns  | Some concerns  | No concerns    | Moderate |
| Mirtazapine: trazodone     | 1 | Some concerns | Suspected  | No concerns | No concerns    | Some concerns  | No concerns    | Low      |
| Mirtazapine: venlafaxine   | 2 | No concerns   | Undetected | No concerns | Some concerns  | Some concerns  | No concerns    | Moderate |
| Nefazodone: paroxetine     | 2 | Some concerns | Undetected | No concerns | Major concerns | No concerns    | No concerns    | Low      |
| Nefazodone: sertraline     | 1 | Some concerns | Undetected | No concerns | Major concerns | No concerns    | No concerns    | Low      |
| Paroxetine: reboxetine     | 1 | Some concerns | Suspected  | No concerns | No concerns    | Some concerns  | No concerns    | Low      |
| Paroxetine: sertraline     | 2 | No concerns   | Undetected | No concerns | Some concerns  | Some concerns  | No concerns    | Moderate |
| Paroxetine: trazodone      | 2 | Some concerns | Suspected  | No concerns | No concerns    | Some concerns  | No concerns    | Low      |
| Paroxetine: venlafaxine    | 2 | Some concerns | Undetected | No concerns | No concerns    | Major concerns | Major concerns | Very low |
| Reboxetine: venlafaxine    | 1 | Some concerns | Suspected  | No concerns | No concerns    | Some concerns  | No concerns    | Low      |
| Sertraline: trazodone      | 1 | Some concerns | Suspected  | No concerns | Some concerns  | Some concerns  | Some concerns  | Very low |
| Sertraline: venlafaxine    | 3 | Some concerns | Undetected | No concerns | Some concerns  | Some concerns  | No concerns    | Moderate |
| Trazodone: venlafaxine     | 1 | Some concerns | Suspected  | No concerns | No concerns    | Some concerns  | No concerns    | Low      |
| Venlafaxine: vortioxetine  | 1 | No concerns   | Undetected | No concerns | Some concerns  | Some concerns  | No concerns    | Moderate |
| Agomelatine: amitriptyline | 0 | No concerns   | Suspected  | No concerns | Some concerns  | Some concerns  | No concerns    | Low      |

|                             |   |               |            |             |                |               |             |          |
|-----------------------------|---|---------------|------------|-------------|----------------|---------------|-------------|----------|
| Agomelatine: bupropion      | 0 | Some concerns | Undetected | No concerns | Major concerns | No concerns   | No concerns | Low      |
| Agomelatine: citalopram     | 0 | No concerns   | Undetected | No concerns | Some concerns  | Some concerns | No concerns | Moderate |
| Agomelatine: clomipramine   | 0 | No concerns   | Suspected  | No concerns | Some concerns  | Some concerns | No concerns | Low      |
| Agomelatine: fluvoxamine    | 0 | No concerns   | Suspected  | No concerns | Some concerns  | Some concerns | No concerns | Low      |
| Agomelatine: milnacipran    | 0 | No concerns   | Suspected  | No concerns | Major concerns | No concerns   | No concerns | Low      |
| Agomelatine: mirtazapine    | 0 | No concerns   | Undetected | No concerns | Some concerns  | Some concerns | No concerns | Moderate |
| Agomelatine: nefazodone     | 0 | No concerns   | Undetected | No concerns | Major concerns | No concerns   | No concerns | Moderate |
| Agomelatine: reboxetine     | 0 | No concerns   | Suspected  | No concerns | No concerns    | Some concerns | No concerns | Moderate |
| Agomelatine: sertraline     | 0 | No concerns   | Undetected | No concerns | Some concerns  | Some concerns | No concerns | Moderate |
| Agomelatine: trazodone      | 0 | No concerns   | Suspected  | No concerns | Some concerns  | No concerns   | No concerns | Moderate |
| Agomelatine: vortioxetine   | 0 | No concerns   | Undetected | No concerns | Major concerns | No concerns   | No concerns | Moderate |
| Amitriptyline: bupropion    | 0 | Some concerns | Suspected  | No concerns | Major concerns | No concerns   | No concerns | Very low |
| Amitriptyline: citalopram   | 0 | No concerns   | Suspected  | No concerns | Some concerns  | Some concerns | No concerns | Low      |
| Amitriptyline: clomipramine | 0 | Some concerns | Suspected  | No concerns | Some concerns  | No concerns   | No concerns | Low      |
| Amitriptyline: duloxetine   | 0 | Some concerns | Suspected  | No concerns | Some concerns  | Some concerns | No concerns | Low      |
| Amitriptyline: escitalopram | 0 | No concerns   | Suspected  | No concerns | Some concerns  | Some concerns | No concerns | Low      |
| Amitriptyline: mirtazapine  | 0 | No concerns   | Suspected  | No concerns | Some concerns  | Some concerns | No concerns | Low      |
| Amitriptyline: nefazodone   | 0 | Some concerns | Suspected  | No concerns | Major concerns | No concerns   | No concerns | Very low |
| Amitriptyline: reboxetine   | 0 | Some concerns | Suspected  | No concerns | No concerns    | Some concerns | No concerns | Low      |
| Amitriptyline: vortioxetine | 0 | No concerns   | Suspected  | No concerns | Major concerns | No concerns   | No concerns | Low      |
| Bupropion: citalopram       | 0 | Some concerns | Undetected | No concerns | Some concerns  | Some concerns | No concerns | Moderate |
| Bupropion: clomipramine     | 0 | Some concerns | Suspected  | No concerns | Some concerns  | No concerns   | No concerns | Low      |
| Bupropion: duloxetine       | 0 | Some concerns | Undetected | No concerns | Major concerns | No concerns   | No concerns | Low      |
| Bupropion: escitalopram     | 0 | Some concerns | Undetected | No concerns | Major concerns | No concerns   | No concerns | Low      |
| Bupropion: fluvoxamine      | 0 | Some concerns | Suspected  | No concerns | Some concerns  | No concerns   | No concerns | Low      |
| Bupropion: milnacipran      | 0 | Some concerns | Suspected  | No concerns | Some concerns  | Some concerns | No concerns | Low      |
| Bupropion: mirtazapine      | 0 | Some concerns | Undetected | No concerns | Major concerns | No concerns   | No concerns | Low      |
| Bupropion: nefazodone       | 0 | Some concerns | Undetected | No concerns | Major concerns | No concerns   | No concerns | Low      |
| Bupropion: reboxetine       | 0 | Some concerns | Suspected  | No concerns | No concerns    | Some concerns | No concerns | Low      |
| Bupropion: vortioxetine     | 0 | Some concerns | Undetected | No concerns | Major concerns | No concerns   | No concerns | Low      |
| Citalopram: duloxetine      | 0 | No concerns   | Undetected | No concerns | Some concerns  | Some concerns | No concerns | Moderate |
| Citalopram: milnacipran     | 0 | No concerns   | Suspected  | No concerns | Major concerns | No concerns   | No concerns | Low      |
| Citalopram: nefazodone      | 0 | Some concerns | Undetected | No concerns | Major concerns | No concerns   | No concerns | Low      |
| Citalopram: paroxetine      | 0 | No concerns   | Undetected | No concerns | Some concerns  | Some concerns | No concerns | Moderate |
| Citalopram: trazodone       | 0 | Some concerns | Suspected  | No concerns | Some concerns  | Some concerns | No concerns | Low      |
| Citalopram: vortioxetine    | 0 | No concerns   | Undetected | No concerns | Some concerns  | Some concerns | No concerns | Moderate |
| Clomipramine: duloxetine    | 0 | Some concerns | Suspected  | No concerns | Some concerns  | Some concerns | No concerns | Low      |

|                            |   |               |            |             |                |               |             |          |
|----------------------------|---|---------------|------------|-------------|----------------|---------------|-------------|----------|
| Clomipramine: escitalopram | 0 | No concerns   | Suspected  | No concerns | No concerns    | Some concerns | No concerns | Moderate |
| Clomipramine: mirtazapine  | 0 | Some concerns | Suspected  | No concerns | Some concerns  | No concerns   | No concerns | Low      |
| Clomipramine: nefazodone   | 0 | Some concerns | Suspected  | No concerns | Major concerns | No concerns   | No concerns | Very low |
| Clomipramine: reboxetine   | 0 | Some concerns | Suspected  | No concerns | Some concerns  | Some concerns | No concerns | Low      |
| Clomipramine: vortioxetine | 0 | No concerns   | Suspected  | No concerns | Some concerns  | No concerns   | No concerns | Moderate |
| Duloxetine: fluoxetine     | 0 | Some concerns | Undetected | No concerns | Some concerns  | Some concerns | No concerns | Moderate |
| Duloxetine: fluvoxamine    | 0 | Some concerns | Suspected  | No concerns | Some concerns  | Some concerns | No concerns | Low      |
| Duloxetine: milnacipran    | 0 | No concerns   | Suspected  | No concerns | Major concerns | No concerns   | No concerns | Low      |
| Duloxetine: mirtazapine    | 0 | No concerns   | Undetected | No concerns | Some concerns  | Some concerns | No concerns | Moderate |
| Duloxetine: nefazodone     | 0 | Some concerns | Undetected | No concerns | Major concerns | No concerns   | No concerns | Low      |
| Duloxetine: reboxetine     | 0 | Some concerns | Suspected  | No concerns | Some concerns  | No concerns   | No concerns | Low      |
| Duloxetine: sertraline     | 0 | Some concerns | Undetected | No concerns | Major concerns | No concerns   | No concerns | Low      |
| Duloxetine: trazodone      | 0 | Some concerns | Suspected  | No concerns | Some concerns  | Some concerns | No concerns | Low      |
| Duloxetine: vortioxetine   | 0 | No concerns   | Undetected | No concerns | Some concerns  | Some concerns | No concerns | Moderate |
| Escitalopram: fluvoxamine  | 0 | No concerns   | Suspected  | No concerns | No concerns    | Some concerns | No concerns | Moderate |
| Escitalopram: milnacipran  | 0 | No concerns   | Suspected  | No concerns | Some concerns  | Some concerns | No concerns | Low      |
| Escitalopram: mirtazapine  | 0 | No concerns   | Undetected | No concerns | Some concerns  | Some concerns | No concerns | Moderate |
| Escitalopram: nefazodone   | 0 | Some concerns | Undetected | No concerns | Some concerns  | Some concerns | No concerns | Moderate |
| Escitalopram: reboxetine   | 0 | Some concerns | Suspected  | No concerns | No concerns    | Some concerns | No concerns | Low      |
| Escitalopram: trazodone    | 0 | No concerns   | Suspected  | No concerns | No concerns    | Some concerns | No concerns | Moderate |
| Escitalopram: vortioxetine | 0 | No concerns   | Undetected | No concerns | Major concerns | No concerns   | No concerns | Moderate |
| Fluoxetine: vortioxetine   | 0 | No concerns   | Undetected | No concerns | Some concerns  | No concerns   | No concerns | High     |
| Fluvoxamine: nefazodone    | 0 | Some concerns | Suspected  | No concerns | Major concerns | No concerns   | No concerns | Very low |
| Fluvoxamine: reboxetine    | 0 | Some concerns | Suspected  | No concerns | Some concerns  | Some concerns | No concerns | Low      |
| Fluvoxamine: trazodone     | 0 | Some concerns | Suspected  | No concerns | Some concerns  | Some concerns | No concerns | Low      |
| Fluvoxamine: vortioxetine  | 0 | No concerns   | Suspected  | No concerns | Some concerns  | No concerns   | No concerns | Moderate |
| Milnacipran: mirtazapine   | 0 | No concerns   | Suspected  | No concerns | Some concerns  | Some concerns | No concerns | Low      |
| Milnacipran: nefazodone    | 0 | Some concerns | Suspected  | No concerns | Major concerns | No concerns   | No concerns | Very low |
| Milnacipran: reboxetine    | 0 | Some concerns | Suspected  | No concerns | Some concerns  | Some concerns | No concerns | Low      |
| Milnacipran: trazodone     | 0 | No concerns   | Suspected  | No concerns | Some concerns  | Some concerns | No concerns | Low      |
| Milnacipran: venlafaxine   | 0 | No concerns   | Suspected  | No concerns | Some concerns  | Some concerns | No concerns | Low      |
| Milnacipran: vortioxetine  | 0 | No concerns   | Suspected  | No concerns | Some concerns  | Some concerns | No concerns | Low      |
| Mirtazapine: nefazodone    | 0 | Some concerns | Undetected | No concerns | Some concerns  | Some concerns | No concerns | Moderate |
| Mirtazapine: reboxetine    | 0 | Some concerns | Suspected  | No concerns | No concerns    | Some concerns | No concerns | Low      |
| Mirtazapine: vortioxetine  | 0 | No concerns   | Undetected | No concerns | Major concerns | No concerns   | No concerns | Moderate |
| Nefazodone: reboxetine     | 0 | Some concerns | Suspected  | No concerns | Major concerns | No concerns   | No concerns | Very low |
| Nefazodone: trazodone      | 0 | Some concerns | Suspected  | No concerns | Major concerns | No concerns   | No concerns | Very low |



|                          |   |               |            |             |                |               |             |          |
|--------------------------|---|---------------|------------|-------------|----------------|---------------|-------------|----------|
| Nefazodone: venlafaxine  | 0 | Some concerns | Undetected | No concerns | Major concerns | No concerns   | No concerns | Low      |
| Nefazodone: vortioxetine | 0 | No concerns   | Undetected | No concerns | Some concerns  | Some concerns | No concerns | Moderate |
| Paroxetine: vortioxetine | 0 | No concerns   | Undetected | No concerns | Some concerns  | Some concerns | No concerns | Moderate |
| Reboxetine: sertraline   | 0 | Some concerns | Suspected  | No concerns | Some concerns  | No concerns   | No concerns | Low      |
| Reboxetine: trazodone    | 0 | Some concerns | Suspected  | No concerns | Major concerns | No concerns   | No concerns | Very low |
| Reboxetine: vortioxetine | 0 | No concerns   | Suspected  | No concerns | No concerns    | Some concerns | No concerns | Moderate |
| Sertraline: vortioxetine | 0 | No concerns   | Undetected | No concerns | Some concerns  | Some concerns | No concerns | Moderate |
| Trazodone: vortioxetine  | 0 | No concerns   | Suspected  | No concerns | No concerns    | Some concerns | No concerns | Moderate |

## 7.2 Acceptability

(1) 1990

*eTable 9. CINeMA assessment for acceptability in 1990.*

| Comparison                  | No. of studies | Within-study bias | Across-studies bias | Indirectness | Imprecision    | Heterogeneity | Incoherence | Confidence rating |
|-----------------------------|----------------|-------------------|---------------------|--------------|----------------|---------------|-------------|-------------------|
| Amitriptyline: bupropion    | 1              | Some concerns     | Suspected           | No concerns  | Major concerns | No concerns   | No concerns | Very low          |
| Amitriptyline: fluoxetine   | 5              | Some concerns     | Suspected           | No concerns  | Some concerns  | No concerns   | No concerns | Low               |
| Amitriptyline: milnacipran  | 2              | Some concerns     | Suspected           | No concerns  | Major concerns | No concerns   | No concerns | Very low          |
| Amitriptyline: paroxetine   | 9              | Some concerns     | Suspected           | No concerns  | Major concerns | No concerns   | No concerns | Very low          |
| Amitriptyline: trazodone    | 3              | Some concerns     | Suspected           | No concerns  | Major concerns | No concerns   | No concerns | Very low          |
| Citalopram: clomipramine    | 1              | No concerns       | Suspected           | No concerns  | Major concerns | No concerns   | No concerns | Low               |
| Clomipramine: fluoxetine    | 1              | Some concerns     | Suspected           | No concerns  | No concerns    | No concerns   | No concerns | Low               |
| Clomipramine: fluvoxamine   | 1              | No concerns       | Suspected           | No concerns  | Major concerns | No concerns   | No concerns | Low               |
| Clomipramine: paroxetine    | 4              | Some concerns     | Suspected           | No concerns  | Major concerns | No concerns   | No concerns | Very low          |
| Fluoxetine: trazodone       | 2              | Some concerns     | Suspected           | No concerns  | Some concerns  | No concerns   | No concerns | Low               |
| Amitriptyline: citalopram   | 0              | Some concerns     | Suspected           | No concerns  | Major concerns | No concerns   | No concerns | Very low          |
| Amitriptyline: clomipramine | 0              | Some concerns     | Suspected           | No concerns  | Some concerns  | No concerns   | No concerns | Low               |
| Amitriptyline: fluvoxamine  | 0              | Some concerns     | Suspected           | No concerns  | Major concerns | No concerns   | No concerns | Very low          |
| Bupropion: citalopram       | 0              | Some concerns     | Undetected          | No concerns  | Major concerns | No concerns   | No concerns | Low               |
| Bupropion: clomipramine     | 0              | Some concerns     | Suspected           | No concerns  | Major concerns | No concerns   | No concerns | Very low          |
| Bupropion: fluoxetine       | 0              | Some concerns     | Undetected          | No concerns  | Major concerns | No concerns   | No concerns | Low               |
| Bupropion: fluvoxamine      | 0              | Some concerns     | Suspected           | No concerns  | Major concerns | No concerns   | No concerns | Very low          |
| Bupropion: milnacipran      | 0              | Some concerns     | Suspected           | No concerns  | Major concerns | No concerns   | No concerns | Very low          |
| Bupropion: paroxetine       | 0              | Some concerns     | Undetected          | No concerns  | Major concerns | No concerns   | No concerns | Low               |
| Bupropion: trazodone        | 0              | Some concerns     | Suspected           | No concerns  | Major concerns | No concerns   | No concerns | Very low          |



|                           |   |               |            |             |                |               |             |          |
|---------------------------|---|---------------|------------|-------------|----------------|---------------|-------------|----------|
| Citalopram: fluoxetine    | 0 | Some concerns | Undetected | No concerns | No concerns    | Some concerns | No concerns | Moderate |
| Citalopram: fluvoxamine   | 0 | No concerns   | Suspected  | No concerns | Major concerns | No concerns   | No concerns | Low      |
| Citalopram: milnacipran   | 0 | Some concerns | Suspected  | No concerns | Major concerns | No concerns   | No concerns | Very low |
| Citalopram: paroxetine    | 0 | Some concerns | Undetected | No concerns | Major concerns | No concerns   | No concerns | Low      |
| Citalopram: trazodone     | 0 | Some concerns | Suspected  | No concerns | Major concerns | No concerns   | No concerns | Very low |
| Clomipramine: milnacipran | 0 | Some concerns | Suspected  | No concerns | Major concerns | No concerns   | No concerns | Very low |
| Clomipramine: trazodone   | 0 | Some concerns | Suspected  | No concerns | Major concerns | No concerns   | No concerns | Very low |
| Fluoxetine: fluvoxamine   | 0 | Some concerns | Suspected  | No concerns | Major concerns | No concerns   | No concerns | Very low |
| Fluoxetine: milnacipran   | 0 | Some concerns | Suspected  | No concerns | Major concerns | No concerns   | No concerns | Very low |
| Fluoxetine: paroxetine    | 0 | Some concerns | Undetected | No concerns | Some concerns  | No concerns   | No concerns | Moderate |
| Fluvoxamine: milnacipran  | 0 | Some concerns | Suspected  | No concerns | Major concerns | No concerns   | No concerns | Very low |
| Fluvoxamine: paroxetine   | 0 | Some concerns | Suspected  | No concerns | Major concerns | No concerns   | No concerns | Very low |
| Fluvoxamine: trazodone    | 0 | Some concerns | Suspected  | No concerns | Major concerns | No concerns   | No concerns | Very low |
| Milnacipran: paroxetine   | 0 | Some concerns | Suspected  | No concerns | Major concerns | No concerns   | No concerns | Very low |
| Milnacipran: trazodone    | 0 | Some concerns | Suspected  | No concerns | Major concerns | No concerns   | No concerns | Very low |
| Paroxetine: trazodone     | 0 | Some concerns | Suspected  | No concerns | Major concerns | No concerns   | No concerns | Very low |

(2) 1995

*eTable 10. CINeMA assessment for acceptability in 1995.*

| Comparison                | No. of studies | Within-study bias | Across-studies bias | Indirectness | Imprecision    | Heterogeneity | Incoherence    | Confidence rating |
|---------------------------|----------------|-------------------|---------------------|--------------|----------------|---------------|----------------|-------------------|
| Amitriptyline:bupropion   | 1              | Some concerns     | Suspected           | No concerns  | Major concerns | No concerns   | No concerns    | Very low          |
| Amitriptyline:fluoxetine  | 9              | Some concerns     | Suspected           | No concerns  | Major concerns | No concerns   | Major concerns | Very low          |
| Amitriptyline:fluvoxamine | 2              | Some concerns     | Suspected           | No concerns  | Some concerns  | No concerns   | No concerns    | Low               |
| Amitriptyline:milnacipran | 2              | Some concerns     | Suspected           | No concerns  | Major concerns | No concerns   | No concerns    | Very low          |
| Amitriptyline:paroxetine  | 14             | Some concerns     | Suspected           | No concerns  | Some concerns  | No concerns   | Major concerns | Very low          |
| Amitriptyline:sertraline  | 2              | Some concerns     | Suspected           | No concerns  | Some concerns  | No concerns   | Some concerns  | Low               |
| Amitriptyline:trazodone   | 3              | Some concerns     | Suspected           | No concerns  | Some concerns  | No concerns   | No concerns    | Low               |
| Bupropion:fluoxetine      | 1              | Some concerns     | Undetected          | No concerns  | Major concerns | No concerns   | No concerns    | Low               |
| Bupropion:trazodone       | 1              | Some concerns     | Suspected           | No concerns  | Major concerns | No concerns   | No concerns    | Very low          |
| Citalopram:clomipramine   | 1              | No concerns       | Suspected           | No concerns  | Major concerns | No concerns   | No concerns    | Low               |
| Citalopram:fluvoxamine    | 1              | No concerns       | Suspected           | No concerns  | Major concerns | No concerns   | No concerns    | Low               |
| Clomipramine:fluoxetine   | 2              | Some concerns     | Suspected           | No concerns  | No concerns    | No concerns   | No concerns    | Low               |
| Clomipramine:fluvoxamine  | 1              | Some concerns     | Suspected           | No concerns  | Major concerns | No concerns   | No concerns    | Very low          |
| Clomipramine:paroxetine   | 6              | Some concerns     | Suspected           | No concerns  | No concerns    | No concerns   | No concerns    | Low               |
| Clomipramine:sertraline   | 1              | Some concerns     | Suspected           | No concerns  | No concerns    | No concerns   | No concerns    | Low               |

|                            |   |               |            |             |                |               |             |          |
|----------------------------|---|---------------|------------|-------------|----------------|---------------|-------------|----------|
| Fluoxetine:milnacipran     | 1 | No concerns   | Suspected  | No concerns | Major concerns | No concerns   | No concerns | Low      |
| Fluoxetine:paroxetine      | 6 | Some concerns | Undetected | No concerns | Some concerns  | No concerns   | No concerns | Moderate |
| Fluoxetine:reboxetine      | 1 | Some concerns | Suspected  | No concerns | Major concerns | No concerns   | No concerns | Very low |
| Fluoxetine:sertraline      | 1 | Some concerns | Undetected | No concerns | Some concerns  | No concerns   | No concerns | Moderate |
| Fluoxetine:trazodone       | 4 | Some concerns | Suspected  | No concerns | Some concerns  | No concerns   | No concerns | Low      |
| Fluoxetine:venlafaxine     | 3 | Some concerns | Undetected | No concerns | Major concerns | No concerns   | No concerns | Low      |
| Fluvoxamine:milnacipran    | 1 | Some concerns | Suspected  | No concerns | Major concerns | No concerns   | No concerns | Very low |
| Fluvoxamine:paroxetine     | 1 | Some concerns | Suspected  | No concerns | Some concerns  | No concerns   | No concerns | Low      |
| Amitriptyline:citalopram   | 0 | Some concerns | Suspected  | No concerns | Major concerns | No concerns   | No concerns | Very low |
| Amitriptyline:clomipramine | 0 | Some concerns | Suspected  | No concerns | No concerns    | No concerns   | No concerns | Low      |
| Amitriptyline:reboxetine   | 0 | Some concerns | Suspected  | No concerns | Major concerns | No concerns   | No concerns | Very low |
| Amitriptyline:venlafaxine  | 0 | Some concerns | Suspected  | No concerns | Major concerns | No concerns   | No concerns | Very low |
| Bupropion:citalopram       | 0 | Some concerns | Undetected | No concerns | Major concerns | No concerns   | No concerns | Low      |
| Bupropion:clomipramine     | 0 | Some concerns | Suspected  | No concerns | Major concerns | No concerns   | No concerns | Very low |
| Bupropion:fluvoxamine      | 0 | Some concerns | Suspected  | No concerns | Major concerns | No concerns   | No concerns | Very low |
| Bupropion:milnacipran      | 0 | Some concerns | Suspected  | No concerns | Major concerns | No concerns   | No concerns | Very low |
| Bupropion:paroxetine       | 0 | Some concerns | Undetected | No concerns | Major concerns | No concerns   | No concerns | Low      |
| Bupropion:reboxetine       | 0 | Some concerns | Suspected  | No concerns | Major concerns | No concerns   | No concerns | Very low |
| Bupropion:sertraline       | 0 | Some concerns | Undetected | No concerns | Some concerns  | No concerns   | No concerns | Moderate |
| Bupropion:venlafaxine      | 0 | Some concerns | Undetected | No concerns | Major concerns | No concerns   | No concerns | Low      |
| Citalopram:fluoxetine      | 0 | No concerns   | Undetected | No concerns | Major concerns | No concerns   | No concerns | Moderate |
| Citalopram:milnacipran     | 0 | No concerns   | Suspected  | No concerns | Major concerns | No concerns   | No concerns | Low      |
| Citalopram:paroxetine      | 0 | Some concerns | Undetected | No concerns | Major concerns | No concerns   | No concerns | Low      |
| Citalopram:reboxetine      | 0 | Some concerns | Suspected  | No concerns | Major concerns | No concerns   | No concerns | Very low |
| Citalopram:sertraline      | 0 | Some concerns | Undetected | No concerns | Some concerns  | No concerns   | No concerns | Moderate |
| Citalopram:trazodone       | 0 | Some concerns | Suspected  | No concerns | Major concerns | No concerns   | No concerns | Very low |
| Citalopram:venlafaxine     | 0 | Some concerns | Undetected | No concerns | Major concerns | No concerns   | No concerns | Low      |
| Clomipramine:milnacipran   | 0 | Some concerns | Suspected  | No concerns | Major concerns | No concerns   | No concerns | Very low |
| Clomipramine:reboxetine    | 0 | Some concerns | Suspected  | No concerns | Major concerns | No concerns   | No concerns | Very low |
| Clomipramine:trazodone     | 0 | Some concerns | Suspected  | No concerns | Major concerns | No concerns   | No concerns | Very low |
| Clomipramine:venlafaxine   | 0 | Some concerns | Suspected  | No concerns | Major concerns | No concerns   | No concerns | Very low |
| Fluoxetine:fluvoxamine     | 0 | Some concerns | Suspected  | No concerns | Some concerns  | Some concerns | No concerns | Low      |
| Fluvoxamine:reboxetine     | 0 | Some concerns | Suspected  | No concerns | Major concerns | No concerns   | No concerns | Very low |
| Fluvoxamine:sertraline     | 0 | Some concerns | Suspected  | No concerns | No concerns    | No concerns   | No concerns | Low      |
| Fluvoxamine:trazodone      | 0 | Some concerns | Suspected  | No concerns | Major concerns | No concerns   | No concerns | Very low |
| Fluvoxamine:venlafaxine    | 0 | Some concerns | Suspected  | No concerns | Major concerns | No concerns   | No concerns | Very low |
| Milnacipran:paroxetine     | 0 | Some concerns | Suspected  | No concerns | Major concerns | No concerns   | No concerns | Very low |

|                         |   |               |            |             |                |             |             |          |
|-------------------------|---|---------------|------------|-------------|----------------|-------------|-------------|----------|
| Milnacipran:reboxetine  | 0 | Some concerns | Suspected  | No concerns | Major concerns | No concerns | No concerns | Very low |
| Milnacipran:sertraline  | 0 | Some concerns | Suspected  | No concerns | Some concerns  | No concerns | No concerns | Low      |
| Milnacipran:trazodone   | 0 | Some concerns | Suspected  | No concerns | Major concerns | No concerns | No concerns | Very low |
| Milnacipran:venlafaxine | 0 | Some concerns | Suspected  | No concerns | Major concerns | No concerns | No concerns | Very low |
| Paroxetine:reboxetine   | 0 | Some concerns | Suspected  | No concerns | Major concerns | No concerns | No concerns | Very low |
| Paroxetine:sertraline   | 0 | Some concerns | Undetected | No concerns | Some concerns  | No concerns | No concerns | Moderate |
| Paroxetine:trazodone    | 0 | Some concerns | Suspected  | No concerns | Some concerns  | No concerns | No concerns | Low      |
| Paroxetine:venlafaxine  | 0 | Some concerns | Undetected | No concerns | Major concerns | No concerns | No concerns | Low      |
| Reboxetine:sertraline   | 0 | Some concerns | Suspected  | No concerns | Major concerns | No concerns | No concerns | Very low |
| Reboxetine:trazodone    | 0 | Some concerns | Suspected  | No concerns | Major concerns | No concerns | No concerns | Very low |
| Reboxetine:venlafaxine  | 0 | Some concerns | Suspected  | No concerns | Major concerns | No concerns | No concerns | Very low |
| Sertraline:trazodone    | 0 | Some concerns | Suspected  | No concerns | No concerns    | No concerns | No concerns | Low      |
| Sertraline:venlafaxine  | 0 | Some concerns | Undetected | No concerns | Some concerns  | No concerns | No concerns | Moderate |
| Trazodone:venlafaxine   | 0 | Some concerns | Suspected  | No concerns | Major concerns | No concerns | No concerns | Very low |

(3) 2000

*eTable 11. CINeMA assessment for acceptability in 2000.*

| Comparison                 | No. of studies | Within-study bias | Across-studies bias | Indirectness | Imprecision    | Heterogeneity | Incoherence    | Confidence rating |
|----------------------------|----------------|-------------------|---------------------|--------------|----------------|---------------|----------------|-------------------|
| Amitriptyline: bupropion   | 1              | Some concerns     | Suspected           | No concerns  | Major concerns | No concerns   | No concerns    | Very low          |
| Amitriptyline: fluoxetine  | 13             | Some concerns     | Suspected           | No concerns  | Some concerns  | No concerns   | No concerns    | Low               |
| Amitriptyline: fluvoxamine | 3              | Some concerns     | Suspected           | No concerns  | Some concerns  | Some concerns | Major concerns | Very low          |
| Amitriptyline: milnacipran | 2              | Some concerns     | Suspected           | No concerns  | Major concerns | No concerns   | No concerns    | Very low          |
| Amitriptyline: mirtazapine | 1              | No concerns       | Suspected           | No concerns  | Major concerns | No concerns   | No concerns    | Low               |
| Amitriptyline: paroxetine  | 16             | Some concerns     | Suspected           | No concerns  | Some concerns  | No concerns   | Some concerns  | Low               |
| Amitriptyline: sertraline  | 3              | Some concerns     | Suspected           | No concerns  | Some concerns  | No concerns   | No concerns    | Low               |
| Amitriptyline: trazodone   | 3              | Some concerns     | Suspected           | No concerns  | Major concerns | No concerns   | No concerns    | Very low          |
| Bupropion: fluoxetine      | 1              | Some concerns     | Undetected          | No concerns  | Major concerns | No concerns   | No concerns    | Low               |
| Bupropion: trazodone       | 1              | Some concerns     | Suspected           | No concerns  | Major concerns | No concerns   | No concerns    | Very low          |
| Citalopram: clomipramine   | 1              | Some concerns     | Suspected           | No concerns  | No concerns    | No concerns   | Some concerns  | Low               |
| Citalopram: fluoxetine     | 2              | No concerns       | Undetected          | No concerns  | Major concerns | No concerns   | No concerns    | Moderate          |
| Citalopram: fluvoxamine    | 1              | No concerns       | Suspected           | No concerns  | Some concerns  | No concerns   | No concerns    | Moderate          |
| Citalopram: mirtazapine    | 1              | No concerns       | Undetected          | No concerns  | Some concerns  | No concerns   | No concerns    | High              |
| Citalopram: sertraline     | 1              | No concerns       | Undetected          | No concerns  | Major concerns | No concerns   | No concerns    | Moderate          |
| Clomipramine: fluoxetine   | 2              | Some concerns     | Suspected           | No concerns  | No concerns    | No concerns   | No concerns    | Low               |
| Clomipramine: fluvoxamine  | 2              | Some concerns     | Suspected           | No concerns  | Major concerns | No concerns   | No concerns    | Very low          |

|                             |   |               |            |             |                |               |             |          |
|-----------------------------|---|---------------|------------|-------------|----------------|---------------|-------------|----------|
| Clomipramine: paroxetine    | 6 | Some concerns | Suspected  | No concerns | No concerns    | No concerns   | No concerns | Low      |
| Clomipramine: sertraline    | 1 | Some concerns | Suspected  | No concerns | No concerns    | No concerns   | No concerns | Low      |
| Clomipramine: venlafaxine   | 1 | Some concerns | Suspected  | No concerns | Some concerns  | No concerns   | No concerns | Low      |
| Fluoxetine: fluvoxamine     | 1 | Some concerns | Suspected  | No concerns | Some concerns  | No concerns   | No concerns | Low      |
| Fluoxetine: milnacipran     | 2 | No concerns   | Suspected  | No concerns | Major concerns | No concerns   | No concerns | Low      |
| Fluoxetine: mirtazapine     | 1 | No concerns   | Undetected | No concerns | Some concerns  | No concerns   | No concerns | High     |
| Fluoxetine: nefazodone      | 3 | Some concerns | Undetected | No concerns | Major concerns | No concerns   | No concerns | Low      |
| Fluoxetine: paroxetine      | 7 | Some concerns | Undetected | No concerns | Some concerns  | Some concerns | No concerns | Moderate |
| Fluoxetine: reboxetine      | 1 | Some concerns | Suspected  | No concerns | Major concerns | No concerns   | No concerns | Very low |
| Fluoxetine: sertraline      | 3 | Some concerns | Undetected | No concerns | Major concerns | No concerns   | No concerns | Low      |
| Fluoxetine: trazodone       | 4 | Some concerns | Suspected  | No concerns | Some concerns  | No concerns   | No concerns | Low      |
| Fluoxetine: venlafaxine     | 6 | Some concerns | Undetected | No concerns | Some concerns  | No concerns   | No concerns | Moderate |
| Fluvoxamine: milnacipran    | 1 | No concerns   | Suspected  | No concerns | Major concerns | No concerns   | No concerns | Low      |
| Fluvoxamine: paroxetine     | 2 | Some concerns | Suspected  | No concerns | Some concerns  | No concerns   | No concerns | Low      |
| Fluvoxamine: sertraline     | 1 | Some concerns | Suspected  | No concerns | Some concerns  | No concerns   | No concerns | Low      |
| Fluvoxamine: venlafaxine    | 1 | Some concerns | Suspected  | No concerns | Some concerns  | No concerns   | No concerns | Low      |
| Mirtazapine: paroxetine     | 1 | No concerns   | Undetected | No concerns | Some concerns  | No concerns   | No concerns | High     |
| Mirtazapine: trazodone      | 1 | Some concerns | Suspected  | No concerns | Major concerns | No concerns   | No concerns | Very low |
| Nefazodone: paroxetine      | 1 | Some concerns | Undetected | No concerns | Major concerns | No concerns   | No concerns | Low      |
| Nefazodone: sertraline      | 1 | Some concerns | Undetected | No concerns | Major concerns | No concerns   | No concerns | Low      |
| Paroxetine: venlafaxine     | 1 | Some concerns | Undetected | No concerns | Major concerns | No concerns   | No concerns | Low      |
| Amitriptyline: citalopram   | 0 | No concerns   | Suspected  | No concerns | Some concerns  | No concerns   | No concerns | Moderate |
| Amitriptyline: clomipramine | 0 | Some concerns | Suspected  | No concerns | Some concerns  | No concerns   | No concerns | Low      |
| Amitriptyline: nefazodone   | 0 | Some concerns | Suspected  | No concerns | Major concerns | No concerns   | No concerns | Very low |
| Amitriptyline: reboxetine   | 0 | Some concerns | Suspected  | No concerns | Major concerns | No concerns   | No concerns | Very low |
| Amitriptyline: venlafaxine  | 0 | Some concerns | Suspected  | No concerns | Some concerns  | Some concerns | No concerns | Low      |
| Bupropion: citalopram       | 0 | Some concerns | Undetected | No concerns | Major concerns | No concerns   | No concerns | Low      |
| Bupropion: clomipramine     | 0 | Some concerns | Suspected  | No concerns | Major concerns | No concerns   | No concerns | Very low |
| Bupropion: fluvoxamine      | 0 | Some concerns | Suspected  | No concerns | Major concerns | No concerns   | No concerns | Very low |
| Bupropion: milnacipran      | 0 | Some concerns | Suspected  | No concerns | Major concerns | No concerns   | No concerns | Very low |
| Bupropion: mirtazapine      | 0 | Some concerns | Undetected | No concerns | Major concerns | No concerns   | No concerns | Low      |
| Bupropion: nefazodone       | 0 | Some concerns | Undetected | No concerns | Major concerns | No concerns   | No concerns | Low      |
| Bupropion: paroxetine       | 0 | Some concerns | Undetected | No concerns | Major concerns | No concerns   | No concerns | Low      |
| Bupropion: reboxetine       | 0 | Some concerns | Suspected  | No concerns | Major concerns | No concerns   | No concerns | Very low |
| Bupropion: sertraline       | 0 | Some concerns | Undetected | No concerns | Major concerns | No concerns   | No concerns | Low      |
| Bupropion: venlafaxine      | 0 | Some concerns | Undetected | No concerns | Major concerns | No concerns   | No concerns | Low      |
| Citalopram: milnacipran     | 0 | No concerns   | Suspected  | No concerns | Major concerns | No concerns   | No concerns | Low      |

|                           |   |               |            |             |                |               |             |          |
|---------------------------|---|---------------|------------|-------------|----------------|---------------|-------------|----------|
| Citalopram: nefazodone    | 0 | Some concerns | Undetected | No concerns | Major concerns | No concerns   | No concerns | Low      |
| Citalopram: paroxetine    | 0 | No concerns   | Undetected | No concerns | Major concerns | No concerns   | No concerns | Moderate |
| Citalopram: reboxetine    | 0 | Some concerns | Suspected  | No concerns | Major concerns | No concerns   | No concerns | Very low |
| Citalopram: trazodone     | 0 | Some concerns | Suspected  | No concerns | Some concerns  | No concerns   | No concerns | Low      |
| Citalopram: venlafaxine   | 0 | Some concerns | Undetected | No concerns | Major concerns | No concerns   | No concerns | Low      |
| Clomipramine: milnacipran | 0 | Some concerns | Suspected  | No concerns | Some concerns  | No concerns   | No concerns | Low      |
| Clomipramine: mirtazapine | 0 | Some concerns | Suspected  | No concerns | Major concerns | No concerns   | No concerns | Very low |
| Clomipramine: nefazodone  | 0 | Some concerns | Suspected  | No concerns | Some concerns  | Some concerns | No concerns | Low      |
| Clomipramine: reboxetine  | 0 | Some concerns | Suspected  | No concerns | Major concerns | No concerns   | No concerns | Very low |
| Clomipramine: trazodone   | 0 | Some concerns | Suspected  | No concerns | Major concerns | No concerns   | No concerns | Very low |
| Fluvoxamine: mirtazapine  | 0 | No concerns   | Suspected  | No concerns | Major concerns | No concerns   | No concerns | Low      |
| Fluvoxamine: nefazodone   | 0 | Some concerns | Suspected  | No concerns | Major concerns | No concerns   | No concerns | Very low |
| Fluvoxamine: reboxetine   | 0 | Some concerns | Suspected  | No concerns | Major concerns | No concerns   | No concerns | Very low |
| Fluvoxamine: trazodone    | 0 | Some concerns | Suspected  | No concerns | Major concerns | No concerns   | No concerns | Very low |
| Milnacipran: mirtazapine  | 0 | No concerns   | Suspected  | No concerns | Major concerns | No concerns   | No concerns | Low      |
| Milnacipran: nefazodone   | 0 | Some concerns | Suspected  | No concerns | Major concerns | No concerns   | No concerns | Very low |
| Milnacipran: paroxetine   | 0 | No concerns   | Suspected  | No concerns | Major concerns | No concerns   | No concerns | Low      |
| Milnacipran: reboxetine   | 0 | Some concerns | Suspected  | No concerns | Major concerns | No concerns   | No concerns | Very low |
| Milnacipran: sertraline   | 0 | No concerns   | Suspected  | No concerns | Major concerns | No concerns   | No concerns | Low      |
| Milnacipran: trazodone    | 0 | Some concerns | Suspected  | No concerns | Major concerns | No concerns   | No concerns | Very low |
| Milnacipran: venlafaxine  | 0 | Some concerns | Suspected  | No concerns | Major concerns | No concerns   | No concerns | Very low |
| Mirtazapine: nefazodone   | 0 | Some concerns | Undetected | No concerns | Major concerns | No concerns   | No concerns | Low      |
| Mirtazapine: reboxetine   | 0 | Some concerns | Suspected  | No concerns | Major concerns | No concerns   | No concerns | Very low |
| Mirtazapine: sertraline   | 0 | No concerns   | Undetected | No concerns | Some concerns  | No concerns   | No concerns | High     |
| Mirtazapine: venlafaxine  | 0 | Some concerns | Undetected | No concerns | Major concerns | No concerns   | No concerns | Low      |
| Nefazodone: reboxetine    | 0 | Some concerns | Suspected  | No concerns | Major concerns | No concerns   | No concerns | Very low |
| Nefazodone: trazodone     | 0 | Some concerns | Suspected  | No concerns | Major concerns | No concerns   | No concerns | Very low |
| Nefazodone: venlafaxine   | 0 | Some concerns | Undetected | No concerns | Major concerns | No concerns   | No concerns | Low      |
| Paroxetine: reboxetine    | 0 | Some concerns | Suspected  | No concerns | Major concerns | No concerns   | No concerns | Very low |
| Paroxetine: sertraline    | 0 | Some concerns | Undetected | No concerns | Some concerns  | Some concerns | No concerns | Moderate |
| Paroxetine: trazodone     | 0 | Some concerns | Suspected  | No concerns | Some concerns  | No concerns   | No concerns | Low      |
| Reboxetine: sertraline    | 0 | Some concerns | Suspected  | No concerns | Major concerns | No concerns   | No concerns | Very low |
| Reboxetine: trazodone     | 0 | Some concerns | Suspected  | No concerns | Major concerns | No concerns   | No concerns | Very low |
| Reboxetine: venlafaxine   | 0 | Some concerns | Suspected  | No concerns | Major concerns | No concerns   | No concerns | Very low |
| Sertraline: trazodone     | 0 | Some concerns | Suspected  | No concerns | Some concerns  | No concerns   | No concerns | Low      |
| Sertraline: venlafaxine   | 0 | Some concerns | Undetected | No concerns | Some concerns  | Some concerns | No concerns | Moderate |
| Trazodone: venlafaxine    | 0 | Some concerns | Suspected  | No concerns | Major concerns | No concerns   | No concerns | Very low |

(4) 2005

eTable 12. CINeMA assessment for acceptability in 2005.

| Comparison                 | No. of studies | Within-study bias | Across-studies bias | Indirectness | Imprecision    | Heterogeneity | Incoherence    | Confidence rating |
|----------------------------|----------------|-------------------|---------------------|--------------|----------------|---------------|----------------|-------------------|
| Agomelatine: paroxetine    | 1              | No concerns       | Undetected          | No concerns  | Some concerns  | No concerns   | Some concerns  | Moderate          |
| Agomelatine: venlafaxine   | 2              | No concerns       | Undetected          | No concerns  | No concerns    | No concerns   | Major concerns | Moderate          |
| Amitriptyline: bupropion   | 1              | Some concerns     | Suspected           | No concerns  | Major concerns | No concerns   | No concerns    | Very low          |
| Amitriptyline: fluoxetine  | 13             | Some concerns     | Suspected           | No concerns  | Some concerns  | No concerns   | No concerns    | Low               |
| Amitriptyline: fluvoxamine | 3              | No concerns       | Suspected           | No concerns  | Some concerns  | No concerns   | Major concerns | Low               |
| Amitriptyline: milnacipran | 2              | Some concerns     | Suspected           | No concerns  | Some concerns  | No concerns   | No concerns    | Low               |
| Amitriptyline: mirtazapine | 1              | No concerns       | Suspected           | No concerns  | Some concerns  | No concerns   | No concerns    | Moderate          |
| Amitriptyline: paroxetine  | 17             | Some concerns     | Suspected           | No concerns  | Some concerns  | No concerns   | No concerns    | Low               |
| Amitriptyline: sertraline  | 4              | Some concerns     | Suspected           | No concerns  | Some concerns  | No concerns   | No concerns    | Low               |
| Amitriptyline: trazodone   | 3              | Some concerns     | Suspected           | No concerns  | Major concerns | No concerns   | No concerns    | Very low          |
| Amitriptyline: venlafaxine | 2              | Some concerns     | Suspected           | No concerns  | No concerns    | No concerns   | No concerns    | Low               |
| Bupropion: fluoxetine      | 1              | Some concerns     | Undetected          | No concerns  | Major concerns | No concerns   | No concerns    | Low               |
| Bupropion: paroxetine      | 1              | Some concerns     | Undetected          | No concerns  | Major concerns | No concerns   | No concerns    | Low               |
| Bupropion: trazodone       | 1              | Some concerns     | Suspected           | No concerns  | Major concerns | No concerns   | No concerns    | Very low          |
| Citalopram: clomipramine   | 1              | Some concerns     | Suspected           | No concerns  | No concerns    | No concerns   | Major concerns | Very low          |
| Citalopram: escitalopram   | 1              | No concerns       | Undetected          | No concerns  | Some concerns  | No concerns   | No concerns    | High              |
| Citalopram: fluoxetine     | 2              | Some concerns     | Undetected          | No concerns  | Some concerns  | No concerns   | No concerns    | Moderate          |
| Citalopram: fluvoxamine    | 1              | No concerns       | Suspected           | No concerns  | Some concerns  | No concerns   | No concerns    | Moderate          |
| Citalopram: mirtazapine    | 1              | No concerns       | Undetected          | No concerns  | Some concerns  | No concerns   | No concerns    | High              |
| Citalopram: sertraline     | 2              | No concerns       | Undetected          | No concerns  | Some concerns  | No concerns   | Some concerns  | Moderate          |
| Clomipramine: fluoxetine   | 2              | Some concerns     | Suspected           | No concerns  | No concerns    | No concerns   | No concerns    | Low               |
| Clomipramine: fluvoxamine  | 2              | Some concerns     | Suspected           | No concerns  | Some concerns  | No concerns   | No concerns    | Low               |
| Clomipramine: paroxetine   | 6              | Some concerns     | Suspected           | No concerns  | No concerns    | No concerns   | No concerns    | Low               |
| Clomipramine: sertraline   | 2              | Some concerns     | Suspected           | No concerns  | No concerns    | No concerns   | No concerns    | Low               |
| Clomipramine: venlafaxine  | 1              | Some concerns     | Suspected           | No concerns  | Some concerns  | No concerns   | No concerns    | Low               |
| Duloxetine: venlafaxine    | 2              | Some concerns     | Undetected          | No concerns  | No concerns    | No concerns   | No concerns    | Moderate          |
| Escitalopram: fluoxetine   | 2              | Some concerns     | Undetected          | No concerns  | Some concerns  | No concerns   | No concerns    | Moderate          |
| Escitalopram: sertraline   | 2              | No concerns       | Undetected          | No concerns  | Some concerns  | No concerns   | No concerns    | High              |
| Escitalopram: venlafaxine  | 2              | No concerns       | Undetected          | No concerns  | Major concerns | No concerns   | No concerns    | Moderate          |
| Fluoxetine: fluvoxamine    | 2              | Some concerns     | Suspected           | No concerns  | Some concerns  | No concerns   | No concerns    | Low               |
| Fluoxetine: milnacipran    | 2              | No concerns       | Suspected           | No concerns  | Some concerns  | No concerns   | No concerns    | Moderate          |
| Fluoxetine: mirtazapine    | 3              | Some concerns     | Undetected          | No concerns  | Some concerns  | No concerns   | No concerns    | Moderate          |
| Fluoxetine: nefazodone     | 3              | Some concerns     | Undetected          | No concerns  | Major concerns | No concerns   | No concerns    | Low               |
| Fluoxetine: paroxetine     | 9              | Some concerns     | Undetected          | No concerns  | No concerns    | No concerns   | No concerns    | Moderate          |

|                            |   |               |            |             |                |             |                |          |
|----------------------------|---|---------------|------------|-------------|----------------|-------------|----------------|----------|
| Fluoxetine: reboxetine     | 2 | Some concerns | Undetected | No concerns | No concerns    | No concerns | No concerns    | Moderate |
| Fluoxetine: sertraline     | 5 | Some concerns | Undetected | No concerns | No concerns    | No concerns | No concerns    | Moderate |
| Fluoxetine: trazodone      | 4 | Some concerns | Suspected  | No concerns | Some concerns  | No concerns | No concerns    | Low      |
| Fluoxetine: venlafaxine    | 7 | Some concerns | Undetected | No concerns | No concerns    | No concerns | No concerns    | Moderate |
| Fluvoxamine: milnacipran   | 2 | Some concerns | Suspected  | No concerns | Some concerns  | No concerns | No concerns    | Low      |
| Fluvoxamine: mirtazapine   | 2 | No concerns   | Suspected  | No concerns | Some concerns  | No concerns | No concerns    | Moderate |
| Fluvoxamine: paroxetine    | 2 | Some concerns | Suspected  | No concerns | Some concerns  | No concerns | No concerns    | Low      |
| Fluvoxamine: sertraline    | 1 | Some concerns | Suspected  | No concerns | Some concerns  | No concerns | Some concerns  | Low      |
| Fluvoxamine: venlafaxine   | 1 | Some concerns | Suspected  | No concerns | Major concerns | No concerns | No concerns    | Very low |
| Milnacipran: paroxetine    | 1 | Some concerns | Suspected  | No concerns | Major concerns | No concerns | No concerns    | Very low |
| Milnacipran: sertraline    | 1 | Some concerns | Suspected  | No concerns | Major concerns | No concerns | No concerns    | Very low |
| Mirtazapine: paroxetine    | 5 | No concerns   | Undetected | No concerns | Some concerns  | No concerns | Major concerns | Moderate |
| Mirtazapine: sertraline    | 1 | Some concerns | Undetected | No concerns | Some concerns  | No concerns | No concerns    | Moderate |
| Mirtazapine: trazodone     | 1 | Some concerns | Suspected  | No concerns | Some concerns  | No concerns | No concerns    | Low      |
| Mirtazapine: venlafaxine   | 1 | No concerns   | Undetected | No concerns | Some concerns  | No concerns | No concerns    | High     |
| Nefazodone: paroxetine     | 2 | Some concerns | Undetected | No concerns | Major concerns | No concerns | No concerns    | Low      |
| Nefazodone: sertraline     | 1 | Some concerns | Undetected | No concerns | Major concerns | No concerns | No concerns    | Low      |
| Paroxetine: reboxetine     | 1 | Some concerns | Undetected | No concerns | No concerns    | No concerns | No concerns    | Moderate |
| Paroxetine: sertraline     | 2 | Some concerns | Undetected | No concerns | Some concerns  | No concerns | No concerns    | Moderate |
| Paroxetine: trazodone      | 1 | Some concerns | Suspected  | No concerns | Some concerns  | No concerns | No concerns    | Low      |
| Paroxetine: venlafaxine    | 2 | Some concerns | Undetected | No concerns | Some concerns  | No concerns | No concerns    | Moderate |
| Sertraline: venlafaxine    | 3 | Some concerns | Undetected | No concerns | Some concerns  | No concerns | No concerns    | Moderate |
| Agomelatine: amitriptyline | 0 | No concerns   | Suspected  | No concerns | No concerns    | No concerns | No concerns    | Moderate |
| Agomelatine: bupropion     | 0 | Some concerns | Undetected | No concerns | Some concerns  | No concerns | No concerns    | Moderate |
| Agomelatine: citalopram    | 0 | No concerns   | Undetected | No concerns | Major concerns | No concerns | No concerns    | Moderate |
| Agomelatine: clomipramine  | 0 | Some concerns | Suspected  | No concerns | No concerns    | No concerns | No concerns    | Low      |
| Agomelatine: duloxetine    | 0 | Some concerns | Undetected | No concerns | No concerns    | No concerns | No concerns    | Moderate |
| Agomelatine: escitalopram  | 0 | No concerns   | Undetected | No concerns | Some concerns  | No concerns | No concerns    | High     |
| Agomelatine: fluoxetine    | 0 | No concerns   | Undetected | No concerns | Some concerns  | No concerns | No concerns    | High     |
| Agomelatine: fluvoxamine   | 0 | No concerns   | Suspected  | No concerns | No concerns    | No concerns | No concerns    | Moderate |
| Agomelatine: milnacipran   | 0 | No concerns   | Suspected  | No concerns | Some concerns  | No concerns | No concerns    | Moderate |
| Agomelatine: mirtazapine   | 0 | No concerns   | Undetected | No concerns | Some concerns  | No concerns | No concerns    | High     |
| Agomelatine: nefazodone    | 0 | Some concerns | Undetected | No concerns | Some concerns  | No concerns | No concerns    | Moderate |
| Agomelatine: reboxetine    | 0 | Some concerns | Undetected | No concerns | No concerns    | No concerns | No concerns    | Moderate |
| Agomelatine: sertraline    | 0 | No concerns   | Undetected | No concerns | Some concerns  | No concerns | No concerns    | High     |
| Agomelatine: trazodone     | 0 | No concerns   | Suspected  | No concerns | No concerns    | No concerns | No concerns    | Moderate |
| Amitriptyline: citalopram  | 0 | No concerns   | Suspected  | No concerns | Some concerns  | No concerns | No concerns    | Moderate |



|                             |   |               |            |             |                |             |             |          |
|-----------------------------|---|---------------|------------|-------------|----------------|-------------|-------------|----------|
| Amitriptyline: clomipramine | 0 | Some concerns | Suspected  | No concerns | No concerns    | No concerns | No concerns | Low      |
| Amitriptyline: duloxetine   | 0 | Some concerns | Suspected  | No concerns | No concerns    | No concerns | No concerns | Low      |
| Amitriptyline: escitalopram | 0 | Some concerns | Suspected  | No concerns | Major concerns | No concerns | No concerns | Very low |
| Amitriptyline: nefazodone   | 0 | Some concerns | Suspected  | No concerns | Major concerns | No concerns | No concerns | Very low |
| Amitriptyline: reboxetine   | 0 | Some concerns | Suspected  | No concerns | Some concerns  | No concerns | No concerns | Low      |
| Bupropion: citalopram       | 0 | Some concerns | Undetected | No concerns | Major concerns | No concerns | No concerns | Low      |
| Bupropion: clomipramine     | 0 | Some concerns | Suspected  | No concerns | Some concerns  | No concerns | No concerns | Low      |
| Bupropion: duloxetine       | 0 | Some concerns | Undetected | No concerns | Some concerns  | No concerns | No concerns | Moderate |
| Bupropion: escitalopram     | 0 | Some concerns | Undetected | No concerns | Major concerns | No concerns | No concerns | Low      |
| Bupropion: fluvoxamine      | 0 | Some concerns | Suspected  | No concerns | Major concerns | No concerns | No concerns | Very low |
| Bupropion: milnacipran      | 0 | Some concerns | Suspected  | No concerns | Major concerns | No concerns | No concerns | Very low |
| Bupropion: mirtazapine      | 0 | Some concerns | Undetected | No concerns | Major concerns | No concerns | No concerns | Low      |
| Bupropion: nefazodone       | 0 | Some concerns | Undetected | No concerns | Major concerns | No concerns | No concerns | Low      |
| Bupropion: reboxetine       | 0 | Some concerns | Undetected | No concerns | Some concerns  | No concerns | No concerns | Moderate |
| Bupropion: sertraline       | 0 | Some concerns | Undetected | No concerns | Major concerns | No concerns | No concerns | Low      |
| Bupropion: venlafaxine      | 0 | Some concerns | Undetected | No concerns | Major concerns | No concerns | No concerns | Low      |
| Citalopram: duloxetine      | 0 | Some concerns | Undetected | No concerns | No concerns    | No concerns | No concerns | Moderate |
| Citalopram: milnacipran     | 0 | No concerns   | Suspected  | No concerns | Major concerns | No concerns | No concerns | Low      |
| Citalopram: nefazodone      | 0 | Some concerns | Undetected | No concerns | Major concerns | No concerns | No concerns | Low      |
| Citalopram: paroxetine      | 0 | No concerns   | Undetected | No concerns | Some concerns  | No concerns | No concerns | High     |
| Citalopram: reboxetine      | 0 | Some concerns | Undetected | No concerns | No concerns    | No concerns | No concerns | Moderate |
| Citalopram: trazodone       | 0 | Some concerns | Suspected  | No concerns | Some concerns  | No concerns | No concerns | Low      |
| Citalopram: venlafaxine     | 0 | No concerns   | Undetected | No concerns | Some concerns  | No concerns | No concerns | High     |
| Clomipramine: duloxetine    | 0 | Some concerns | Suspected  | No concerns | Major concerns | No concerns | No concerns | Very low |
| Clomipramine: escitalopram  | 0 | Some concerns | Suspected  | No concerns | Some concerns  | No concerns | No concerns | Low      |
| Clomipramine: milnacipran   | 0 | Some concerns | Suspected  | No concerns | No concerns    | No concerns | No concerns | Low      |
| Clomipramine: mirtazapine   | 0 | Some concerns | Suspected  | No concerns | No concerns    | No concerns | No concerns | Low      |
| Clomipramine: nefazodone    | 0 | Some concerns | Suspected  | No concerns | Some concerns  | No concerns | No concerns | Low      |
| Clomipramine: reboxetine    | 0 | Some concerns | Suspected  | No concerns | Major concerns | No concerns | No concerns | Very low |
| Clomipramine: trazodone     | 0 | Some concerns | Suspected  | No concerns | Some concerns  | No concerns | No concerns | Low      |
| Duloxetine: escitalopram    | 0 | No concerns   | Undetected | No concerns | Some concerns  | No concerns | No concerns | High     |
| Duloxetine: fluoxetine      | 0 | Some concerns | Undetected | No concerns | No concerns    | No concerns | No concerns | Moderate |
| Duloxetine: fluvoxamine     | 0 | Some concerns | Suspected  | No concerns | Some concerns  | No concerns | No concerns | Low      |
| Duloxetine: milnacipran     | 0 | Some concerns | Suspected  | No concerns | No concerns    | No concerns | No concerns | Low      |
| Duloxetine: mirtazapine     | 0 | Some concerns | Undetected | No concerns | No concerns    | No concerns | No concerns | Moderate |
| Duloxetine: nefazodone      | 0 | Some concerns | Undetected | No concerns | Some concerns  | No concerns | No concerns | Moderate |
| Duloxetine: paroxetine      | 0 | Some concerns | Undetected | No concerns | No concerns    | No concerns | No concerns | Moderate |



|                           |   |               |            |             |                |               |             |          |
|---------------------------|---|---------------|------------|-------------|----------------|---------------|-------------|----------|
| Duloxetine: reboxetine    | 0 | Some concerns | Undetected | No concerns | Major concerns | No concerns   | No concerns | Low      |
| Duloxetine: sertraline    | 0 | Some concerns | Undetected | No concerns | No concerns    | No concerns   | No concerns | Moderate |
| Duloxetine: trazodone     | 0 | Some concerns | Suspected  | No concerns | Some concerns  | No concerns   | No concerns | Low      |
| Escitalopram: fluvoxamine | 0 | Some concerns | Suspected  | No concerns | Major concerns | No concerns   | No concerns | Very low |
| Escitalopram: milnacipran | 0 | No concerns   | Suspected  | No concerns | Major concerns | No concerns   | No concerns | Low      |
| Escitalopram: mirtazapine | 0 | No concerns   | Undetected | No concerns | Major concerns | No concerns   | No concerns | Moderate |
| Escitalopram: nefazodone  | 0 | Some concerns | Undetected | No concerns | Major concerns | No concerns   | No concerns | Low      |
| Escitalopram: paroxetine  | 0 | Some concerns | Undetected | No concerns | Major concerns | No concerns   | No concerns | Low      |
| Escitalopram: reboxetine  | 0 | Some concerns | Undetected | No concerns | Some concerns  | No concerns   | No concerns | Moderate |
| Escitalopram: trazodone   | 0 | Some concerns | Suspected  | No concerns | Major concerns | No concerns   | No concerns | Very low |
| Fluvoxamine: nefazodone   | 0 | Some concerns | Suspected  | No concerns | Major concerns | No concerns   | No concerns | Very low |
| Fluvoxamine: reboxetine   | 0 | Some concerns | Suspected  | No concerns | Some concerns  | No concerns   | No concerns | Low      |
| Fluvoxamine: trazodone    | 0 | Some concerns | Suspected  | No concerns | Major concerns | No concerns   | No concerns | Very low |
| Milnacipran: mirtazapine  | 0 | No concerns   | Suspected  | No concerns | Major concerns | No concerns   | No concerns | Low      |
| Milnacipran: nefazodone   | 0 | Some concerns | Suspected  | No concerns | Major concerns | No concerns   | No concerns | Very low |
| Milnacipran: reboxetine   | 0 | Some concerns | Suspected  | No concerns | Some concerns  | No concerns   | No concerns | Low      |
| Milnacipran: trazodone    | 0 | Some concerns | Suspected  | No concerns | Major concerns | No concerns   | No concerns | Very low |
| Milnacipran: venlafaxine  | 0 | Some concerns | Suspected  | No concerns | Some concerns  | No concerns   | No concerns | Low      |
| Mirtazapine: nefazodone   | 0 | Some concerns | Undetected | No concerns | Major concerns | No concerns   | No concerns | Low      |
| Mirtazapine: reboxetine   | 0 | Some concerns | Undetected | No concerns | Some concerns  | No concerns   | No concerns | Moderate |
| Nefazodone: reboxetine    | 0 | Some concerns | Undetected | No concerns | Some concerns  | Some concerns | No concerns | Moderate |
| Nefazodone: trazodone     | 0 | Some concerns | Suspected  | No concerns | Major concerns | No concerns   | No concerns | Very low |
| Nefazodone: venlafaxine   | 0 | Some concerns | Undetected | No concerns | Major concerns | No concerns   | No concerns | Low      |
| Reboxetine: sertraline    | 0 | Some concerns | Undetected | No concerns | No concerns    | No concerns   | No concerns | Moderate |
| Reboxetine: trazodone     | 0 | Some concerns | Suspected  | No concerns | Some concerns  | No concerns   | No concerns | Low      |
| Reboxetine: venlafaxine   | 0 | Some concerns | Undetected | No concerns | Some concerns  | No concerns   | No concerns | Moderate |
| Sertraline: trazodone     | 0 | Some concerns | Suspected  | No concerns | Some concerns  | No concerns   | No concerns | Low      |
| Trazodone: venlafaxine    | 0 | Some concerns | Suspected  | No concerns | Major concerns | No concerns   | No concerns | Very low |

(5) 2010

eTable 13. CINeMA assessment for acceptability in 2010.

| Comparison                 | No. of studies | Within-study bias | Across-studies bias | Indirectness | Imprecision    | Heterogeneity | Incoherence    | Confidence rating |
|----------------------------|----------------|-------------------|---------------------|--------------|----------------|---------------|----------------|-------------------|
| Agomelatine: escitalopram  | 2              | No concerns       | Undetected          | No concerns  | Some concerns  | No concerns   | No concerns    | High              |
| Agomelatine: fluoxetine    | 2              | No concerns       | Undetected          | No concerns  | No concerns    | No concerns   | No concerns    | High              |
| Agomelatine: paroxetine    | 2              | No concerns       | Undetected          | No concerns  | No concerns    | No concerns   | Some concerns  | High              |
| Agomelatine: venlafaxine   | 2              | No concerns       | Undetected          | No concerns  | No concerns    | No concerns   | Some concerns  | High              |
| Amitriptyline: bupropion   | 1              | Some concerns     | Suspected           | No concerns  | Major concerns | No concerns   | No concerns    | Very low          |
| Amitriptyline: fluoxetine  | 13             | Some concerns     | Suspected           | No concerns  | Some concerns  | No concerns   | No concerns    | Low               |
| Amitriptyline: fluvoxamine | 3              | No concerns       | Suspected           | No concerns  | Some concerns  | No concerns   | Major concerns | Low               |
| Amitriptyline: milnacipran | 2              | Some concerns     | Suspected           | No concerns  | Some concerns  | No concerns   | No concerns    | Low               |
| Amitriptyline: mirtazapine | 1              | No concerns       | Suspected           | No concerns  | Some concerns  | No concerns   | No concerns    | Moderate          |
| Amitriptyline: paroxetine  | 17             | Some concerns     | Suspected           | No concerns  | Some concerns  | No concerns   | No concerns    | Low               |
| Amitriptyline: sertraline  | 4              | Some concerns     | Suspected           | No concerns  | Some concerns  | No concerns   | No concerns    | Low               |
| Amitriptyline: trazodone   | 3              | Some concerns     | Suspected           | No concerns  | Major concerns | No concerns   | No concerns    | Very low          |
| Amitriptyline: venlafaxine | 2              | Some concerns     | Suspected           | No concerns  | No concerns    | No concerns   | No concerns    | Low               |
| Bupropion: fluoxetine      | 1              | Some concerns     | Undetected          | No concerns  | Major concerns | No concerns   | No concerns    | Low               |
| Bupropion: paroxetine      | 1              | Some concerns     | Undetected          | No concerns  | Major concerns | No concerns   | No concerns    | Low               |
| Bupropion: trazodone       | 1              | Some concerns     | Suspected           | No concerns  | Major concerns | No concerns   | No concerns    | Very low          |
| Bupropion: venlafaxine     | 1              | Some concerns     | Undetected          | No concerns  | Some concerns  | No concerns   | No concerns    | Moderate          |
| Citalopram: clomipramine   | 1              | Some concerns     | Suspected           | No concerns  | No concerns    | No concerns   | Some concerns  | Low               |
| Citalopram: escitalopram   | 5              | No concerns       | Undetected          | No concerns  | Some concerns  | No concerns   | Some concerns  | Moderate          |
| Citalopram: fluoxetine     | 2              | No concerns       | Undetected          | No concerns  | Some concerns  | No concerns   | No concerns    | High              |
| Citalopram: fluvoxamine    | 1              | No concerns       | Suspected           | No concerns  | Some concerns  | No concerns   | No concerns    | Moderate          |
| Citalopram: mirtazapine    | 1              | No concerns       | Undetected          | No concerns  | Major concerns | No concerns   | Some concerns  | Moderate          |
| Citalopram: reboxetine     | 1              | Some concerns     | Suspected           | No concerns  | No concerns    | No concerns   | No concerns    | Low               |
| Citalopram: sertraline     | 2              | No concerns       | Undetected          | No concerns  | Some concerns  | Some concerns | Major concerns | Low               |
| Clomipramine: fluoxetine   | 2              | Some concerns     | Suspected           | No concerns  | No concerns    | No concerns   | No concerns    | Low               |
| Clomipramine: fluvoxamine  | 2              | Some concerns     | Suspected           | No concerns  | Some concerns  | No concerns   | No concerns    | Low               |
| Clomipramine: paroxetine   | 6              | Some concerns     | Suspected           | No concerns  | No concerns    | No concerns   | No concerns    | Low               |
| Clomipramine: sertraline   | 2              | Some concerns     | Suspected           | No concerns  | No concerns    | No concerns   | No concerns    | Low               |
| Clomipramine: venlafaxine  | 1              | Some concerns     | Suspected           | No concerns  | No concerns    | No concerns   | No concerns    | Low               |
| Duloxetine: escitalopram   | 2              | No concerns       | Undetected          | No concerns  | No concerns    | No concerns   | No concerns    | High              |
| Duloxetine: paroxetine     | 1              | Some concerns     | Undetected          | No concerns  | No concerns    | No concerns   | No concerns    | High              |
| Duloxetine: venlafaxine    | 2              | Some concerns     | Undetected          | No concerns  | No concerns    | No concerns   | No concerns    | High              |
| Escitalopram: fluoxetine   | 3              | No concerns       | Undetected          | No concerns  | Some concerns  | No concerns   | No concerns    | High              |
| Escitalopram: paroxetine   | 2              | No concerns       | Undetected          | No concerns  | Some concerns  | No concerns   | No concerns    | High              |

|                            |   |               |            |             |                |             |             |          |
|----------------------------|---|---------------|------------|-------------|----------------|-------------|-------------|----------|
| Escitalopram: sertraline   | 2 | No concerns   | Undetected | No concerns | Some concerns  | No concerns | No concerns | High     |
| Escitalopram: venlafaxine  | 2 | No concerns   | Undetected | No concerns | No concerns    | No concerns | No concerns | High     |
| Fluoxetine: fluvoxamine    | 2 | Some concerns | Suspected  | No concerns | Some concerns  | No concerns | No concerns | Low      |
| Fluoxetine: milnacipran    | 2 | No concerns   | Suspected  | No concerns | Some concerns  | No concerns | No concerns | Moderate |
| Fluoxetine: mirtazapine    | 5 | No concerns   | Undetected | No concerns | Some concerns  | No concerns | No concerns | High     |
| Fluoxetine: nefazodone     | 3 | Some concerns | Undetected | No concerns | Major concerns | No concerns | No concerns | Low      |
| Fluoxetine: paroxetine     | 9 | Some concerns | Undetected | No concerns | No concerns    | No concerns | No concerns | Moderate |
| Fluoxetine: reboxetine     | 2 | Some concerns | Suspected  | No concerns | No concerns    | No concerns | No concerns | Low      |
| Fluoxetine: sertraline     | 5 | Some concerns | Undetected | No concerns | No concerns    | No concerns | No concerns | Moderate |
| Fluoxetine: trazodone      | 4 | Some concerns | Suspected  | No concerns | Some concerns  | No concerns | No concerns | Low      |
| Fluoxetine: venlafaxine    | 8 | Some concerns | Undetected | No concerns | Some concerns  | No concerns | No concerns | Moderate |
| Fluvoxamine: milnacipran   | 2 | Some concerns | Suspected  | No concerns | Some concerns  | No concerns | No concerns | Low      |
| Fluvoxamine: mirtazapine   | 2 | No concerns   | Suspected  | No concerns | Some concerns  | No concerns | No concerns | Moderate |
| Fluvoxamine: paroxetine    | 2 | Some concerns | Suspected  | No concerns | Some concerns  | No concerns | No concerns | Low      |
| Fluvoxamine: sertraline    | 2 | Some concerns | Suspected  | No concerns | Some concerns  | No concerns | No concerns | Low      |
| Fluvoxamine: venlafaxine   | 1 | Some concerns | Suspected  | No concerns | Some concerns  | No concerns | No concerns | Low      |
| Milnacipran: paroxetine    | 1 | Some concerns | Suspected  | No concerns | Major concerns | No concerns | No concerns | Very low |
| Milnacipran: sertraline    | 1 | Some concerns | Suspected  | No concerns | Major concerns | No concerns | No concerns | Very low |
| Mirtazapine: paroxetine    | 5 | No concerns   | Undetected | No concerns | No concerns    | No concerns | No concerns | High     |
| Mirtazapine: sertraline    | 1 | No concerns   | Undetected | No concerns | Some concerns  | No concerns | No concerns | High     |
| Mirtazapine: trazodone     | 1 | Some concerns | Suspected  | No concerns | Some concerns  | No concerns | No concerns | Low      |
| Mirtazapine: venlafaxine   | 2 | No concerns   | Undetected | No concerns | Some concerns  | No concerns | No concerns | High     |
| Nefazodone: paroxetine     | 2 | Some concerns | Undetected | No concerns | Major concerns | No concerns | No concerns | Low      |
| Nefazodone: sertraline     | 1 | Some concerns | Undetected | No concerns | Major concerns | No concerns | No concerns | Low      |
| Paroxetine: reboxetine     | 1 | Some concerns | Suspected  | No concerns | No concerns    | No concerns | No concerns | Low      |
| Paroxetine: sertraline     | 2 | Some concerns | Undetected | No concerns | Some concerns  | No concerns | No concerns | Moderate |
| Paroxetine: trazodone      | 2 | No concerns   | Suspected  | No concerns | Some concerns  | No concerns | No concerns | Moderate |
| Paroxetine: venlafaxine    | 2 | Some concerns | Undetected | No concerns | Some concerns  | No concerns | No concerns | Moderate |
| Sertraline: trazodone      | 1 | Some concerns | Suspected  | No concerns | Some concerns  | No concerns | No concerns | Low      |
| Sertraline: venlafaxine    | 3 | Some concerns | Undetected | No concerns | Some concerns  | No concerns | No concerns | Moderate |
| Agomelatine: amitriptyline | 0 | No concerns   | Suspected  | No concerns | No concerns    | No concerns | No concerns | Moderate |
| Agomelatine: bupropion     | 0 | Some concerns | Undetected | No concerns | Some concerns  | No concerns | No concerns | Moderate |
| Agomelatine: citalopram    | 0 | No concerns   | Undetected | No concerns | Some concerns  | No concerns | No concerns | High     |
| Agomelatine: clomipramine  | 0 | No concerns   | Suspected  | No concerns | No concerns    | No concerns | No concerns | Moderate |
| Agomelatine: duloxetine    | 0 | No concerns   | Undetected | No concerns | No concerns    | No concerns | No concerns | High     |
| Agomelatine: fluvoxamine   | 0 | No concerns   | Suspected  | No concerns | No concerns    | No concerns | No concerns | Moderate |
| Agomelatine: milnacipran   | 0 | No concerns   | Suspected  | No concerns | Some concerns  | No concerns | No concerns | Moderate |

|                             |   |               |            |             |                |               |             |          |
|-----------------------------|---|---------------|------------|-------------|----------------|---------------|-------------|----------|
| Agomelatine: mirtazapine    | 0 | No concerns   | Undetected | No concerns | No concerns    | No concerns   | No concerns | High     |
| Agomelatine: nefazodone     | 0 | No concerns   | Undetected | No concerns | Some concerns  | No concerns   | No concerns | High     |
| Agomelatine: reboxetine     | 0 | No concerns   | Suspected  | No concerns | No concerns    | No concerns   | No concerns | Moderate |
| Agomelatine: sertraline     | 0 | No concerns   | Undetected | No concerns | Some concerns  | No concerns   | No concerns | High     |
| Agomelatine: trazodone      | 0 | No concerns   | Suspected  | No concerns | No concerns    | No concerns   | No concerns | Moderate |
| Amitriptyline: citalopram   | 0 | No concerns   | Suspected  | No concerns | Some concerns  | No concerns   | No concerns | Moderate |
| Amitriptyline: clomipramine | 0 | Some concerns | Suspected  | No concerns | No concerns    | No concerns   | No concerns | Low      |
| Amitriptyline: duloxetine   | 0 | Some concerns | Suspected  | No concerns | No concerns    | No concerns   | No concerns | Low      |
| Amitriptyline: escitalopram | 0 | No concerns   | Suspected  | No concerns | Some concerns  | No concerns   | No concerns | Moderate |
| Amitriptyline: nefazodone   | 0 | Some concerns | Suspected  | No concerns | Major concerns | No concerns   | No concerns | Very low |
| Amitriptyline: reboxetine   | 0 | Some concerns | Suspected  | No concerns | Some concerns  | No concerns   | No concerns | Low      |
| Bupropion: citalopram       | 0 | Some concerns | Undetected | No concerns | Major concerns | No concerns   | No concerns | Low      |
| Bupropion: clomipramine     | 0 | Some concerns | Suspected  | No concerns | Some concerns  | No concerns   | No concerns | Low      |
| Bupropion: duloxetine       | 0 | Some concerns | Undetected | No concerns | No concerns    | No concerns   | No concerns | Moderate |
| Bupropion: escitalopram     | 0 | Some concerns | Undetected | No concerns | Some concerns  | No concerns   | No concerns | Moderate |
| Bupropion: fluvoxamine      | 0 | Some concerns | Suspected  | No concerns | Some concerns  | Some concerns | No concerns | Low      |
| Bupropion: milnacipran      | 0 | Some concerns | Suspected  | No concerns | Major concerns | No concerns   | No concerns | Very low |
| Bupropion: mirtazapine      | 0 | Some concerns | Undetected | No concerns | Major concerns | No concerns   | No concerns | Low      |
| Bupropion: nefazodone       | 0 | Some concerns | Undetected | No concerns | Major concerns | No concerns   | No concerns | Low      |
| Bupropion: reboxetine       | 0 | Some concerns | Suspected  | No concerns | No concerns    | Some concerns | No concerns | Low      |
| Bupropion: sertraline       | 0 | Some concerns | Undetected | No concerns | Major concerns | No concerns   | No concerns | Low      |
| Citalopram: duloxetine      | 0 | Some concerns | Undetected | No concerns | No concerns    | No concerns   | No concerns | Moderate |
| Citalopram: milnacipran     | 0 | No concerns   | Suspected  | No concerns | Major concerns | No concerns   | No concerns | Low      |
| Citalopram: nefazodone      | 0 | Some concerns | Undetected | No concerns | Major concerns | No concerns   | No concerns | Low      |
| Citalopram: paroxetine      | 0 | No concerns   | Undetected | No concerns | Some concerns  | No concerns   | No concerns | High     |
| Citalopram: trazodone       | 0 | Some concerns | Suspected  | No concerns | Some concerns  | No concerns   | No concerns | Low      |
| Citalopram: venlafaxine     | 0 | No concerns   | Undetected | No concerns | Some concerns  | No concerns   | No concerns | High     |
| Clomipramine: duloxetine    | 0 | Some concerns | Suspected  | No concerns | Major concerns | No concerns   | No concerns | Very low |
| Clomipramine: escitalopram  | 0 | Some concerns | Suspected  | No concerns | No concerns    | No concerns   | No concerns | Low      |
| Clomipramine: milnacipran   | 0 | Some concerns | Suspected  | No concerns | No concerns    | No concerns   | No concerns | Low      |
| Clomipramine: mirtazapine   | 0 | Some concerns | Suspected  | No concerns | No concerns    | No concerns   | No concerns | Low      |
| Clomipramine: nefazodone    | 0 | Some concerns | Suspected  | No concerns | Some concerns  | No concerns   | No concerns | Low      |
| Clomipramine: reboxetine    | 0 | Some concerns | Suspected  | No concerns | Major concerns | No concerns   | No concerns | Very low |
| Clomipramine: trazodone     | 0 | Some concerns | Suspected  | No concerns | Some concerns  | No concerns   | No concerns | Low      |
| Duloxetine: fluoxetine      | 0 | Some concerns | Undetected | No concerns | No concerns    | No concerns   | No concerns | Moderate |
| Duloxetine: fluvoxamine     | 0 | Some concerns | Suspected  | No concerns | Some concerns  | No concerns   | No concerns | Low      |
| Duloxetine: milnacipran     | 0 | Some concerns | Suspected  | No concerns | No concerns    | No concerns   | No concerns | Low      |

|                           |   |               |            |             |                |               |             |          |
|---------------------------|---|---------------|------------|-------------|----------------|---------------|-------------|----------|
| Duloxetine: mirtazapine   | 0 | No concerns   | Undetected | No concerns | No concerns    | No concerns   | No concerns | High     |
| Duloxetine: nefazodone    | 0 | Some concerns | Undetected | No concerns | Some concerns  | No concerns   | No concerns | Moderate |
| Duloxetine: reboxetine    | 0 | Some concerns | Suspected  | No concerns | Major concerns | No concerns   | No concerns | Very low |
| Duloxetine: sertraline    | 0 | Some concerns | Undetected | No concerns | No concerns    | No concerns   | No concerns | Moderate |
| Duloxetine: trazodone     | 0 | Some concerns | Suspected  | No concerns | Some concerns  | No concerns   | No concerns | Low      |
| Escitalopram: fluvoxamine | 0 | No concerns   | Suspected  | No concerns | No concerns    | Some concerns | No concerns | Moderate |
| Escitalopram: milnacipran | 0 | No concerns   | Suspected  | No concerns | Some concerns  | No concerns   | No concerns | Moderate |
| Escitalopram: mirtazapine | 0 | No concerns   | Undetected | No concerns | Some concerns  | No concerns   | No concerns | High     |
| Escitalopram: nefazodone  | 0 | Some concerns | Undetected | No concerns | Some concerns  | No concerns   | No concerns | Moderate |
| Escitalopram: reboxetine  | 0 | Some concerns | Suspected  | No concerns | No concerns    | No concerns   | No concerns | Low      |
| Escitalopram: trazodone   | 0 | No concerns   | Suspected  | No concerns | Some concerns  | No concerns   | No concerns | Moderate |
| Fluvoxamine: nefazodone   | 0 | Some concerns | Suspected  | No concerns | Major concerns | No concerns   | No concerns | Very low |
| Fluvoxamine: reboxetine   | 0 | Some concerns | Suspected  | No concerns | Some concerns  | No concerns   | No concerns | Low      |
| Fluvoxamine: trazodone    | 0 | Some concerns | Suspected  | No concerns | Major concerns | No concerns   | No concerns | Very low |
| Milnacipran: mirtazapine  | 0 | No concerns   | Suspected  | No concerns | Major concerns | No concerns   | No concerns | Low      |
| Milnacipran: nefazodone   | 0 | Some concerns | Suspected  | No concerns | Major concerns | No concerns   | No concerns | Very low |
| Milnacipran: reboxetine   | 0 | Some concerns | Suspected  | No concerns | No concerns    | No concerns   | No concerns | Low      |
| Milnacipran: trazodone    | 0 | Some concerns | Suspected  | No concerns | Major concerns | No concerns   | No concerns | Very low |
| Milnacipran: venlafaxine  | 0 | Some concerns | Suspected  | No concerns | Some concerns  | No concerns   | No concerns | Low      |
| Mirtazapine: nefazodone   | 0 | Some concerns | Undetected | No concerns | Major concerns | No concerns   | No concerns | Low      |
| Mirtazapine: reboxetine   | 0 | Some concerns | Suspected  | No concerns | No concerns    | No concerns   | No concerns | Low      |
| Nefazodone: reboxetine    | 0 | Some concerns | Suspected  | No concerns | Some concerns  | No concerns   | No concerns | Low      |
| Nefazodone: trazodone     | 0 | Some concerns | Suspected  | No concerns | Major concerns | No concerns   | No concerns | Very low |
| Nefazodone: venlafaxine   | 0 | Some concerns | Undetected | No concerns | Major concerns | No concerns   | No concerns | Low      |
| Reboxetine: sertraline    | 0 | Some concerns | Suspected  | No concerns | No concerns    | No concerns   | No concerns | Low      |
| Reboxetine: trazodone     | 0 | Some concerns | Suspected  | No concerns | Some concerns  | No concerns   | No concerns | Low      |
| Reboxetine: venlafaxine   | 0 | Some concerns | Suspected  | No concerns | No concerns    | Some concerns | No concerns | Low      |
| Trazodone: venlafaxine    | 0 | Some concerns | Suspected  | No concerns | Major concerns | No concerns   | No concerns | Very low |

(6) 2016

eTable 14. CINeMA assessment for acceptability in 2016.

| Comparison                 | No. of studies | Within-study bias | Across-studies bias | Indirectness | Imprecision    | Heterogeneity  | Incoherence    | Confidence rating |
|----------------------------|----------------|-------------------|---------------------|--------------|----------------|----------------|----------------|-------------------|
| Agomelatine: duloxetine    | 1              | No concerns       | Undetected          | No concerns  | No concerns    | No concerns    | Major concerns | Moderate          |
| Agomelatine: escitalopram  | 2              | No concerns       | Undetected          | No concerns  | Major concerns | No concerns    | No concerns    | Moderate          |
| Agomelatine: fluoxetine    | 2              | No concerns       | Undetected          | No concerns  | Some concerns  | No concerns    | No concerns    | High              |
| Agomelatine: paroxetine    | 2              | No concerns       | Undetected          | No concerns  | Some concerns  | No concerns    | No concerns    | High              |
| Agomelatine: venlafaxine   | 2              | No concerns       | Undetected          | No concerns  | No concerns    | Some concerns  | Some concerns  | Moderate          |
| Amitriptyline: bupropion   | 1              | Some concerns     | Suspected           | No concerns  | Major concerns | No concerns    | No concerns    | Very low          |
| Amitriptyline: fluoxetine  | 13             | Some concerns     | Suspected           | No concerns  | Some concerns  | No concerns    | No concerns    | Low               |
| Amitriptyline: fluvoxamine | 3              | No concerns       | Suspected           | No concerns  | Some concerns  | Some concerns  | No concerns    | Low               |
| Amitriptyline: milnacipran | 2              | No concerns       | Suspected           | No concerns  | Some concerns  | Some concerns  | No concerns    | Low               |
| Amitriptyline: mirtazapine | 1              | No concerns       | Suspected           | No concerns  | Some concerns  | No concerns    | No concerns    | Moderate          |
| Amitriptyline: paroxetine  | 17             | Some concerns     | Suspected           | No concerns  | Some concerns  | No concerns    | No concerns    | Low               |
| Amitriptyline: sertraline  | 4              | Some concerns     | Suspected           | No concerns  | Some concerns  | No concerns    | No concerns    | Low               |
| Amitriptyline: trazodone   | 3              | Some concerns     | Suspected           | No concerns  | Major concerns | No concerns    | No concerns    | Very low          |
| Amitriptyline: venlafaxine | 2              | Some concerns     | Suspected           | No concerns  | No concerns    | Major concerns | No concerns    | Very low          |
| Bupropion: fluoxetine      | 1              | Some concerns     | Undetected          | No concerns  | Major concerns | No concerns    | No concerns    | Low               |
| Bupropion: paroxetine      | 1              | Some concerns     | Undetected          | No concerns  | Major concerns | No concerns    | No concerns    | Low               |
| Bupropion: trazodone       | 1              | Some concerns     | Suspected           | No concerns  | Major concerns | No concerns    | No concerns    | Very low          |
| Bupropion: venlafaxine     | 1              | Some concerns     | Undetected          | No concerns  | Major concerns | No concerns    | No concerns    | Low               |
| Citalopram: clomipramine   | 1              | Some concerns     | Suspected           | No concerns  | No concerns    | No concerns    | Some concerns  | Low               |
| Citalopram: escitalopram   | 7              | No concerns       | Undetected          | No concerns  | Some concerns  | Some concerns  | No concerns    | Moderate          |
| Citalopram: fluoxetine     | 2              | No concerns       | Undetected          | No concerns  | Some concerns  | Some concerns  | No concerns    | Moderate          |
| Citalopram: fluvoxamine    | 1              | No concerns       | Suspected           | No concerns  | Some concerns  | No concerns    | No concerns    | Moderate          |
| Citalopram: mirtazapine    | 1              | No concerns       | Undetected          | No concerns  | Some concerns  | Some concerns  | Some concerns  | Moderate          |
| Citalopram: reboxetine     | 1              | Some concerns     | Undetected          | No concerns  | No concerns    | No concerns    | No concerns    | Moderate          |
| Citalopram: sertraline     | 2              | No concerns       | Undetected          | No concerns  | Major concerns | No concerns    | Major concerns | Low               |
| Citalopram: venlafaxine    | 1              | No concerns       | Undetected          | No concerns  | Some concerns  | No concerns    | Some concerns  | Moderate          |
| Clomipramine: fluoxetine   | 2              | Some concerns     | Suspected           | No concerns  | No concerns    | No concerns    | No concerns    | Low               |
| Clomipramine: fluvoxamine  | 2              | Some concerns     | Suspected           | No concerns  | Some concerns  | No concerns    | No concerns    | Low               |
| Clomipramine: paroxetine   | 6              | Some concerns     | Suspected           | No concerns  | No concerns    | No concerns    | No concerns    | Low               |
| Clomipramine: sertraline   | 2              | Some concerns     | Suspected           | No concerns  | No concerns    | No concerns    | No concerns    | Low               |
| Clomipramine: venlafaxine  | 1              | Some concerns     | Suspected           | No concerns  | No concerns    | Some concerns  | No concerns    | Low               |
| Duloxetine: escitalopram   | 2              | No concerns       | Undetected          | No concerns  | No concerns    | No concerns    | No concerns    | High              |
| Duloxetine: paroxetine     | 2              | Some concerns     | Undetected          | No concerns  | No concerns    | Some concerns  | No concerns    | Moderate          |
| Duloxetine: venlafaxine    | 2              | Some concerns     | Undetected          | No concerns  | Some concerns  | No concerns    | Some concerns  | Moderate          |

|                            |   |               |            |             |                |                |               |          |
|----------------------------|---|---------------|------------|-------------|----------------|----------------|---------------|----------|
| Escitalopram: fluoxetine   | 3 | No concerns   | Undetected | No concerns | Some concerns  | No concerns    | No concerns   | High     |
| Escitalopram: paroxetine   | 2 | No concerns   | Undetected | No concerns | Some concerns  | No concerns    | No concerns   | High     |
| Escitalopram: sertraline   | 2 | No concerns   | Undetected | No concerns | Some concerns  | No concerns    | No concerns   | High     |
| Escitalopram: venlafaxine  | 2 | No concerns   | Undetected | No concerns | No concerns    | Some concerns  | No concerns   | High     |
| Fluoxetine: fluvoxamine    | 2 | Some concerns | Suspected  | No concerns | Some concerns  | No concerns    | No concerns   | Low      |
| Fluoxetine: milnacipran    | 2 | No concerns   | Suspected  | No concerns | Some concerns  | Some concerns  | No concerns   | Low      |
| Fluoxetine: mirtazapine    | 5 | No concerns   | Undetected | No concerns | Some concerns  | No concerns    | No concerns   | High     |
| Fluoxetine: nefazodone     | 3 | Some concerns | Undetected | No concerns | Major concerns | No concerns    | No concerns   | Low      |
| Fluoxetine: paroxetine     | 9 | No concerns   | Undetected | No concerns | No concerns    | Some concerns  | No concerns   | High     |
| Fluoxetine: reboxetine     | 2 | Some concerns | Undetected | No concerns | No concerns    | No concerns    | No concerns   | Moderate |
| Fluoxetine: sertraline     | 5 | Some concerns | Undetected | No concerns | No concerns    | Major concerns | No concerns   | Low      |
| Fluoxetine: trazodone      | 4 | Some concerns | Suspected  | No concerns | Some concerns  | No concerns    | No concerns   | Low      |
| Fluoxetine: venlafaxine    | 8 | Some concerns | Undetected | No concerns | Some concerns  | No concerns    | No concerns   | Moderate |
| Fluvoxamine: milnacipran   | 2 | Some concerns | Suspected  | No concerns | Some concerns  | Some concerns  | No concerns   | Low      |
| Fluvoxamine: mirtazapine   | 2 | No concerns   | Suspected  | No concerns | Some concerns  | No concerns    | No concerns   | Moderate |
| Fluvoxamine: paroxetine    | 2 | Some concerns | Suspected  | No concerns | Some concerns  | No concerns    | No concerns   | Low      |
| Fluvoxamine: sertraline    | 2 | Some concerns | Suspected  | No concerns | Some concerns  | No concerns    | No concerns   | Low      |
| Fluvoxamine: venlafaxine   | 1 | Some concerns | Suspected  | No concerns | Some concerns  | Some concerns  | No concerns   | Low      |
| Milnacipran: paroxetine    | 2 | No concerns   | Suspected  | No concerns | Some concerns  | Some concerns  | No concerns   | Low      |
| Milnacipran: sertraline    | 1 | No concerns   | Suspected  | No concerns | Some concerns  | Some concerns  | No concerns   | Low      |
| Mirtazapine: paroxetine    | 5 | No concerns   | Undetected | No concerns | No concerns    | Major concerns | No concerns   | Moderate |
| Mirtazapine: sertraline    | 1 | No concerns   | Undetected | No concerns | Some concerns  | Some concerns  | No concerns   | Moderate |
| Mirtazapine: trazodone     | 1 | Some concerns | Suspected  | No concerns | Some concerns  | Some concerns  | No concerns   | Low      |
| Mirtazapine: venlafaxine   | 2 | No concerns   | Undetected | No concerns | Some concerns  | No concerns    | No concerns   | High     |
| Nefazodone: paroxetine     | 2 | Some concerns | Undetected | No concerns | Major concerns | No concerns    | No concerns   | Low      |
| Nefazodone: sertraline     | 1 | Some concerns | Undetected | No concerns | Major concerns | No concerns    | No concerns   | Low      |
| Paroxetine: reboxetine     | 1 | Some concerns | Undetected | No concerns | No concerns    | No concerns    | No concerns   | Moderate |
| Paroxetine: sertraline     | 2 | Some concerns | Undetected | No concerns | Some concerns  | No concerns    | No concerns   | Moderate |
| Paroxetine: trazodone      | 2 | No concerns   | Suspected  | No concerns | Some concerns  | Some concerns  | No concerns   | Moderate |
| Paroxetine: venlafaxine    | 2 | Some concerns | Undetected | No concerns | Some concerns  | No concerns    | No concerns   | Moderate |
| Sertraline: trazodone      | 1 | Some concerns | Suspected  | No concerns | Some concerns  | No concerns    | No concerns   | Low      |
| Sertraline: venlafaxine    | 3 | Some concerns | Undetected | No concerns | Some concerns  | No concerns    | No concerns   | Moderate |
| Venlafaxine: vortioxetine  | 1 | No concerns   | Undetected | No concerns | No concerns    | Some concerns  | Some concerns | Moderate |
| Agomelatine: amitriptyline | 0 | No concerns   | Suspected  | No concerns | No concerns    | Some concerns  | Some concerns | Low      |
| Agomelatine: bupropion     | 0 | Some concerns | Undetected | No concerns | Some concerns  | No concerns    | Some concerns | Moderate |
| Agomelatine: citalopram    | 0 | No concerns   | Undetected | No concerns | Some concerns  | Some concerns  | Some concerns | Moderate |
| Agomelatine: clomipramine  | 0 | No concerns   | Suspected  | No concerns | No concerns    | No concerns    | Some concerns | Moderate |

|                             |   |               |            |             |                |               |               |          |
|-----------------------------|---|---------------|------------|-------------|----------------|---------------|---------------|----------|
| Agomelatine: fluvoxamine    | 0 | No concerns   | Suspected  | No concerns | No concerns    | Some concerns | Some concerns | Low      |
| Agomelatine: milnacipran    | 0 | No concerns   | Suspected  | No concerns | Some concerns  | No concerns   | Some concerns | Low      |
| Agomelatine: mirtazapine    | 0 | No concerns   | Undetected | No concerns | Some concerns  | No concerns   | Some concerns | Moderate |
| Agomelatine: nefazodone     | 0 | No concerns   | Undetected | No concerns | Some concerns  | No concerns   | Some concerns | Moderate |
| Agomelatine: reboxetine     | 0 | No concerns   | Undetected | No concerns | No concerns    | No concerns   | Some concerns | High     |
| Agomelatine: sertraline     | 0 | No concerns   | Undetected | No concerns | Some concerns  | No concerns   | Some concerns | Moderate |
| Agomelatine: trazodone      | 0 | No concerns   | Suspected  | No concerns | Some concerns  | No concerns   | Some concerns | Low      |
| Agomelatine: vortioxetine   | 0 | No concerns   | Undetected | No concerns | Major concerns | No concerns   | Some concerns | Moderate |
| Amitriptyline: citalopram   | 0 | No concerns   | Suspected  | No concerns | Some concerns  | No concerns   | Some concerns | Low      |
| Amitriptyline: clomipramine | 0 | Some concerns | Suspected  | No concerns | Some concerns  | No concerns   | Some concerns | Low      |
| Amitriptyline: duloxetine   | 0 | Some concerns | Suspected  | No concerns | Some concerns  | No concerns   | Some concerns | Low      |
| Amitriptyline: escitalopram | 0 | No concerns   | Suspected  | No concerns | No concerns    | Some concerns | Some concerns | Low      |
| Amitriptyline: nefazodone   | 0 | Some concerns | Suspected  | No concerns | Major concerns | No concerns   | Some concerns | Very low |
| Amitriptyline: reboxetine   | 0 | Some concerns | Suspected  | No concerns | Some concerns  | No concerns   | Some concerns | Low      |
| Amitriptyline: vortioxetine | 0 | No concerns   | Suspected  | No concerns | No concerns    | Some concerns | Some concerns | Low      |
| Bupropion: citalopram       | 0 | Some concerns | Undetected | No concerns | Major concerns | No concerns   | Some concerns | Low      |
| Bupropion: clomipramine     | 0 | Some concerns | Suspected  | No concerns | Some concerns  | No concerns   | Some concerns | Low      |
| Bupropion: duloxetine       | 0 | Some concerns | Undetected | No concerns | Some concerns  | No concerns   | Some concerns | Moderate |
| Bupropion: escitalopram     | 0 | Some concerns | Undetected | No concerns | Some concerns  | Some concerns | Some concerns | Low      |
| Bupropion: fluvoxamine      | 0 | Some concerns | Suspected  | No concerns | Major concerns | No concerns   | Some concerns | Very low |
| Bupropion: milnacipran      | 0 | Some concerns | Suspected  | No concerns | Major concerns | No concerns   | Some concerns | Very low |
| Bupropion: mirtazapine      | 0 | Some concerns | Undetected | No concerns | Major concerns | No concerns   | Some concerns | Low      |
| Bupropion: nefazodone       | 0 | Some concerns | Undetected | No concerns | Major concerns | No concerns   | Some concerns | Low      |
| Bupropion: reboxetine       | 0 | Some concerns | Undetected | No concerns | Some concerns  | No concerns   | Some concerns | Moderate |
| Bupropion: sertraline       | 0 | Some concerns | Undetected | No concerns | Major concerns | No concerns   | Some concerns | Low      |
| Bupropion: vortioxetine     | 0 | Some concerns | Undetected | No concerns | Some concerns  | No concerns   | Some concerns | Moderate |
| Citalopram: duloxetine      | 0 | No concerns   | Undetected | No concerns | No concerns    | Some concerns | Some concerns | Moderate |
| Citalopram: milnacipran     | 0 | No concerns   | Suspected  | No concerns | Some concerns  | Some concerns | Some concerns | Low      |
| Citalopram: nefazodone      | 0 | Some concerns | Undetected | No concerns | Major concerns | No concerns   | Some concerns | Low      |
| Citalopram: paroxetine      | 0 | No concerns   | Undetected | No concerns | Some concerns  | Some concerns | Some concerns | Moderate |
| Citalopram: trazodone       | 0 | Some concerns | Suspected  | No concerns | Some concerns  | No concerns   | Some concerns | Low      |
| Citalopram: vortioxetine    | 0 | No concerns   | Undetected | No concerns | Some concerns  | Some concerns | Some concerns | Moderate |
| Clomipramine: duloxetine    | 0 | Some concerns | Suspected  | No concerns | Some concerns  | Some concerns | Some concerns | Very low |
| Clomipramine: escitalopram  | 0 | Some concerns | Suspected  | No concerns | No concerns    | No concerns   | Some concerns | Low      |
| Clomipramine: milnacipran   | 0 | Some concerns | Suspected  | No concerns | No concerns    | Some concerns | Some concerns | Low      |
| Clomipramine: mirtazapine   | 0 | Some concerns | Suspected  | No concerns | No concerns    | Some concerns | Some concerns | Low      |
| Clomipramine: nefazodone    | 0 | Some concerns | Suspected  | No concerns | Major concerns | No concerns   | Some concerns | Very low |



|                            |   |               |            |             |                |               |               |          |
|----------------------------|---|---------------|------------|-------------|----------------|---------------|---------------|----------|
| Clomipramine: reboxetine   | 0 | Some concerns | Suspected  | No concerns | Major concerns | No concerns   | Some concerns | Very low |
| Clomipramine: trazodone    | 0 | Some concerns | Suspected  | No concerns | Some concerns  | No concerns   | Some concerns | Low      |
| Clomipramine: vortioxetine | 0 | No concerns   | Suspected  | No concerns | No concerns    | No concerns   | Some concerns | Moderate |
| Duloxetine: fluoxetine     | 0 | Some concerns | Undetected | No concerns | No concerns    | Some concerns | Some concerns | Moderate |
| Duloxetine: fluvoxamine    | 0 | Some concerns | Suspected  | No concerns | Some concerns  | Some concerns | Some concerns | Very low |
| Duloxetine: milnacipran    | 0 | No concerns   | Suspected  | No concerns | Some concerns  | No concerns   | Some concerns | Low      |
| Duloxetine: mirtazapine    | 0 | No concerns   | Undetected | No concerns | Some concerns  | No concerns   | Some concerns | Moderate |
| Duloxetine: nefazodone     | 0 | Some concerns | Undetected | No concerns | Major concerns | No concerns   | Some concerns | Low      |
| Duloxetine: reboxetine     | 0 | Some concerns | Undetected | No concerns | Major concerns | No concerns   | Some concerns | Low      |
| Duloxetine: sertraline     | 0 | Some concerns | Undetected | No concerns | No concerns    | Some concerns | Some concerns | Moderate |
| Duloxetine: trazodone      | 0 | Some concerns | Suspected  | No concerns | Major concerns | No concerns   | Some concerns | Very low |
| Duloxetine: vortioxetine   | 0 | No concerns   | Undetected | No concerns | No concerns    | No concerns   | Some concerns | High     |
| Escitalopram: fluvoxamine  | 0 | No concerns   | Suspected  | No concerns | No concerns    | Some concerns | Some concerns | Low      |
| Escitalopram: milnacipran  | 0 | No concerns   | Suspected  | No concerns | Some concerns  | No concerns   | Some concerns | Low      |
| Escitalopram: mirtazapine  | 0 | No concerns   | Undetected | No concerns | Some concerns  | No concerns   | Some concerns | Moderate |
| Escitalopram: nefazodone   | 0 | Some concerns | Undetected | No concerns | Some concerns  | No concerns   | Some concerns | Moderate |
| Escitalopram: reboxetine   | 0 | Some concerns | Undetected | No concerns | No concerns    | No concerns   | Some concerns | Moderate |
| Escitalopram: trazodone    | 0 | No concerns   | Suspected  | No concerns | Some concerns  | No concerns   | Some concerns | Low      |
| Escitalopram: vortioxetine | 0 | No concerns   | Undetected | No concerns | Major concerns | No concerns   | Some concerns | Moderate |
| Fluoxetine: vortioxetine   | 0 | No concerns   | Undetected | No concerns | Some concerns  | No concerns   | Some concerns | Moderate |
| Fluvoxamine: nefazodone    | 0 | Some concerns | Suspected  | No concerns | Major concerns | No concerns   | Some concerns | Very low |
| Fluvoxamine: reboxetine    | 0 | Some concerns | Suspected  | No concerns | Some concerns  | No concerns   | Some concerns | Low      |
| Fluvoxamine: trazodone     | 0 | Some concerns | Suspected  | No concerns | Major concerns | No concerns   | Some concerns | Very low |
| Fluvoxamine: vortioxetine  | 0 | No concerns   | Suspected  | No concerns | No concerns    | Some concerns | Some concerns | Low      |
| Milnacipran: mirtazapine   | 0 | No concerns   | Suspected  | No concerns | Major concerns | No concerns   | Some concerns | Low      |
| Milnacipran: nefazodone    | 0 | Some concerns | Suspected  | No concerns | Major concerns | No concerns   | Some concerns | Very low |
| Milnacipran: reboxetine    | 0 | Some concerns | Suspected  | No concerns | Some concerns  | No concerns   | Some concerns | Low      |
| Milnacipran: trazodone     | 0 | No concerns   | Suspected  | No concerns | Major concerns | No concerns   | Some concerns | Low      |
| Milnacipran: venlafaxine   | 0 | No concerns   | Suspected  | No concerns | Some concerns  | Some concerns | Some concerns | Low      |
| Milnacipran: vortioxetine  | 0 | No concerns   | Suspected  | No concerns | Some concerns  | No concerns   | Some concerns | Low      |
| Mirtazapine: nefazodone    | 0 | Some concerns | Undetected | No concerns | Major concerns | No concerns   | Some concerns | Low      |
| Mirtazapine: reboxetine    | 0 | Some concerns | Undetected | No concerns | No concerns    | Some concerns | Some concerns | Moderate |
| Mirtazapine: vortioxetine  | 0 | No concerns   | Undetected | No concerns | Some concerns  | No concerns   | Some concerns | Moderate |
| Nefazodone: reboxetine     | 0 | Some concerns | Undetected | No concerns | Major concerns | No concerns   | Some concerns | Low      |
| Nefazodone: trazodone      | 0 | Some concerns | Suspected  | No concerns | Major concerns | No concerns   | Some concerns | Very low |
| Nefazodone: venlafaxine    | 0 | Some concerns | Undetected | No concerns | Major concerns | No concerns   | Some concerns | Low      |
| Nefazodone: vortioxetine   | 0 | No concerns   | Undetected | No concerns | Some concerns  | No concerns   | Some concerns | Moderate |

|                                 |   |               |            |             |                |             |               |          |
|---------------------------------|---|---------------|------------|-------------|----------------|-------------|---------------|----------|
| <b>Paroxetine: vortioxetine</b> | 0 | No concerns   | Undetected | No concerns | Some concerns  | No concerns | Some concerns | Moderate |
| <b>Reboxetine: sertraline</b>   | 0 | Some concerns | Undetected | No concerns | No concerns    | No concerns | Some concerns | Moderate |
| <b>Reboxetine: trazodone</b>    | 0 | Some concerns | Suspected  | No concerns | Some concerns  | No concerns | Some concerns | Low      |
| <b>Reboxetine: venlafaxine</b>  | 0 | Some concerns | Undetected | No concerns | Some concerns  | No concerns | Some concerns | Moderate |
| <b>Reboxetine: vortioxetine</b> | 0 | No concerns   | Undetected | No concerns | No concerns    | No concerns | Some concerns | High     |
| <b>Sertraline: vortioxetine</b> | 0 | No concerns   | Undetected | No concerns | Some concerns  | No concerns | Some concerns | Moderate |
| <b>Trazodone: venlafaxine</b>   | 0 | Some concerns | Suspected  | No concerns | Major concerns | No concerns | Some concerns | Very low |
| <b>Trazodone: vortioxetine</b>  | 0 | No concerns   | Suspected  | No concerns | Some concerns  | No concerns | Some concerns | Low      |

# 8 Exemplar screen shots of the Shiny application

## (1) Home page

### Introduction

#### Interactive Plots to Demonstrate the Evolution of Evidence for Antidepressants in the Acute Treatment of Major Depression

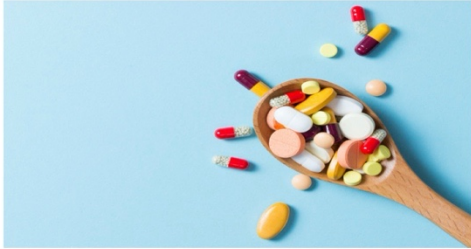

The data used in this study comes from GRISelda (Group of Researchers Investigating Specific Efficacy of Individual Drugs for Acute depression) [1]. Double-blind RCTs of the acute phase treatment with 21 antidepressants for adult patients ( $\geq 18$  years old) with a primary diagnosis of major depression were systematically searched and included. About one in four trials included in the dataset comes from unpublished data, and two come from both published and unpublished sources.

In the network meta-analysis, we use two primary outcomes: efficacy and acceptability. Efficacy was measured by the response rate of the intervention, defined as the proportion of patients who showed 50% or greater reduction on a validated depression severity scales from baseline. Acceptability was measured by the all-cause discontinuation rate, defined as the proportion of patients who withdrew early due to any reasons.

[1] Cipriani A, Furukawa TA, Salanti G, et al, 2018. Comparative efficacy and acceptability of 21 antidepressant drugs for the acute treatment of adults with major depressive disorder: a systematic review and network meta-analysis. *Lancet* 391, 1357-1366.

Choose the type of RCT you would like to synthesize: the reference drug will be placebo if all the trials are included, and the reference will be citalopram if only head-to-head trials are included.

**Choose the type of RCT**

Including placebo-controlled trials

Only head-to-head trials

Choose the period of network meta-analysis: RCTs conducted during this period will be pooled for the analysis.

**Show the pooled evidence since**

1978

**Show the pooled evidence until**

2016

The dataset includes all published and unpublished data. If you would like to see the results from published data only, please check the box below.

**Check the publication status of RCTs**

Pool data from published RCTs only

### Input

Network Plots and Basic Information   2 Dimensional Plots   Forest Plots   League Tables   Pairwise Comparisons   Funnel Plots

**The efficacy network:**

**Output**

The number of included studies: 179  
The number of included treatments: 18  
The network includes the following treatments:  
agomelatine fluoxetine paroxetine venlafaxine escitalopram duloxetine bupropion trazodone sertraline citalopram clomipramine fluvoxamine amitriptyline milnacipran mirtazapine nefazodone reboxetine vortioxetine

The overall heterogeneity Q-statistic is: 137.685 , and the p value for the test is 0.028  
The overall inconsistency Q-statistic is: 76.618 , and the p value for the test is 0.043  
The I-squared is: 0.23  
The tau (square-root of between-study variance) is: 0.179

**The acceptability network:**

The number of included studies: 174  
The number of included treatments: 18  
The network includes the following treatments:  
agomelatine fluoxetine paroxetine venlafaxine escitalopram duloxetine amitriptyline bupropion trazodone citalopram clomipramine fluvoxamine sertraline milnacipran mirtazapine nefazodone reboxetine vortioxetine

The overall heterogeneity Q-statistic is: 100.227 , and the p value for the test is 0.613  
The overall inconsistency Q-statistic is: 70.478 , and the p value for the test is 0.054  
The I-squared is: 0.074  
The tau (square-root of between-study variance) is: 0.109

**Note:**

- (1) The size of the node is proportionate to the number of randomized patients, and the thickness of the line is proportionate to the number of studies.
- (2) The *netmeta* package in R adopts generalized Cochran's Q statistic to assess the assumption of homogeneity and consistency. It is calculated as the weighted sum of squared differences between individual study effects and the pooled effect across studies, with the weights being those used in the pooling method. This Q statistic can be decomposed in a sum of within-design Q statistics (used to assess heterogeneity among direct comparisons) and one between-designs Q statistic (used to assess inconsistency between direct and indirect evidence). We provide both Q statistics and their p values for the test.
- (3) The I-squared statistic describes the percentage of variation across studies that is due to heterogeneity rather than chance.
- (4) In random-effects meta-analysis, the extent of variation among the effects observed in different studies (between-study variance) is referred to as tau-squared . tau-squared is the variance of the effect size parameters across the population of studies and it reflects the variance of the true effect sizes. The square root of this number is referred to as tau.

## (2) Two-dimensional plots

### (a) Only head-to-head trials

Choose the type of RCT you would like to synthesize: the reference drug will be placebo if all the trials are included, and the reference will be citalopram if only head-to-head trials are included.

**Choose the type of RCT**

Including placebo-controlled trials

Only head-to-head trials

Choose the period of network meta-analysis: RCTs conducted during this period will be pooled for the analysis.

**Show the pooled evidence since**

1978

**Show the pooled evidence until**

2016

The dataset includes all published and unpublished data. If you would like to see the results from published data only, please check the box below.

**Check the publication status of RCTs**

Pool data from published RCTs only

[Network Plots and Basic Information](#)
[2 Dimensional Plots](#)
[Forest Plots](#)
[League Tables](#)
[Pairwise Comparisons](#)
[Funnel Plots](#)

The 2 Dimensional Plot for Both Efficacy and Acceptability

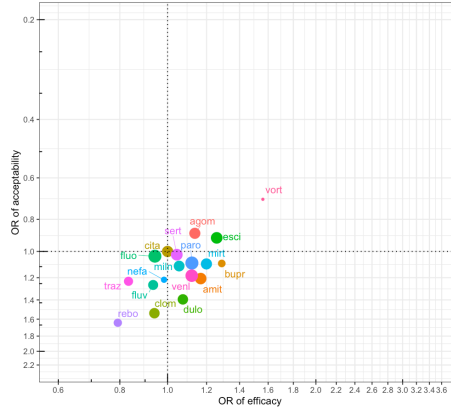

Please click the plot to see a zoomed one with the optimal ranges of x and y axis. (The zoomed plot will be displayed below.)

**Note:**

- (1) Drugs in the upper right area are better balanced in both efficacy and acceptability.
- (2) The size of the node is proportionate to the number of randomized patients.
- (3) If placebo-controlled trials are included, the plot will display 2 sets of result. The solid circles indicate results from full dataset, while the empty circles indicate results from only published data.

**The zoomed figure with optimal x and y axis ranges.**

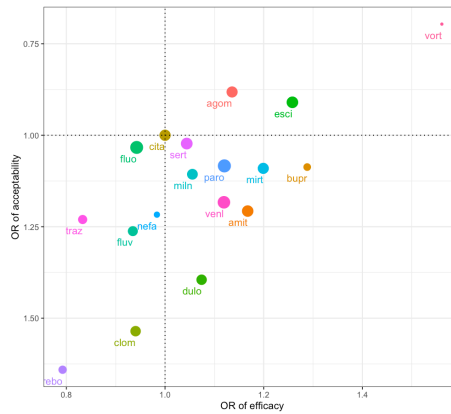

## (b) Including placebo-controlled trials

Choose the type of RCT you would like to synthesize: the reference drug will be placebo if all the trials are included, and the reference will be citalopram if only head-to-head trials are included.

### Choose the type of RCT

- Including placebo-controlled trials
- Only head-to-head trials

Choose the period of network meta-analysis: RCTs conducted during this period will be pooled for the analysis.

### Show the pooled evidence since

1978

### Show the pooled evidence until

2016

The dataset includes all published and unpublished data. If you would like to see the results from published data only, please check the box below.

### Check the publication status of RCTs

- Pool data from published RCTs only

Network Plots and Basic Information

2 Dimensional Plots

Forest Plots

League Tables

Pairwise Comparisons

Funnel Plots

### The 2 Dimensional Plot for Both Efficacy and Acceptability

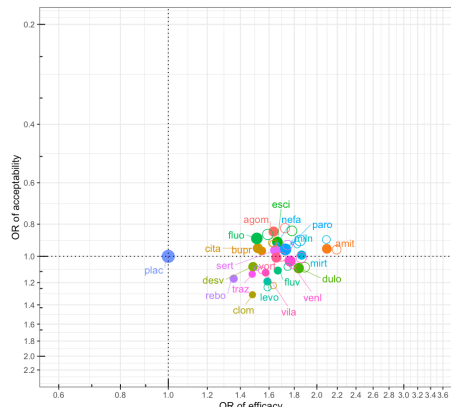

Please click the plot to see a zoomed one with the optimal ranges of x and y axis. (The zoomed plot will be displayed below.)

#### Note:

(1) Drugs in the upper right area are better balanced in both efficacy and acceptability.

(2) The size of the node is proportionate to the number of randomized patients.

(3) If placebo-controlled trials are included, the plot will display 2 sets of result. The solid circles indicate results from full dataset, while the empty circles indicate results from only published data.

**Two sets of dots: solid circles – full data; empty circles – published data only (exaggerated effects)**

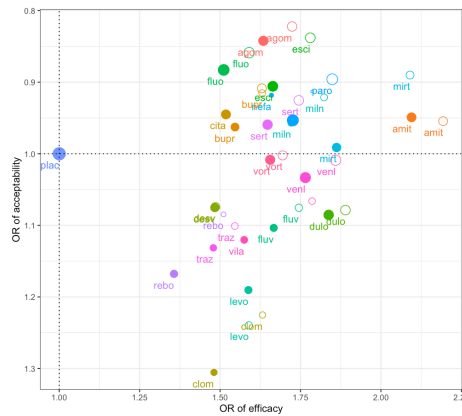

## (c) Integrating confidence in the evidence

### The 2 Dimensional Plot Showing Efficacy and Acceptability Together with Confidence in the Evidence

We assessed the confidence in the evidence every 5 years since 1990, for head-to-head trials. We believe that it should be as important to see how credible the evidence are, as with the relative effect estimates. We evaluated it at 3 levels: RCT-level, comparison-level and drug-level. At **RCT-level**, we assessed the risk of bias for each RCT based on Cochrane Collaboration risk of bias tool. At **comparison-level**, we evaluated it at each time point using *CINeMA framework* [2] through the dedicated software. Finally, the information was synthesized at **drug-level**. We combined the efficacy, acceptability and confidence in the evidence (at drug-level) in one 2 dimensional plot at each time point.

\*\*Since the confidence in the evidence was only assessed for **head-to-head trials** at **5-year interval**, this 2 dimensional plot is not as versatile as other functions. The conditions in the left sidebar are not applicable to it. **ONLY THE YEARS LISTED BELOW CAN BE SELECTED FOR THIS PLOT.**

All the evidence before the chosen year are synthesized. Please choose the ending time point.

Show the pooled evidence until

2016

[2] CINeMA: Confidence in Network Meta-Analysis [Software]. Institute of Social and Preventive Medicine, University of Bern, 2017. Available from cinema.ispm.unibe.ch.

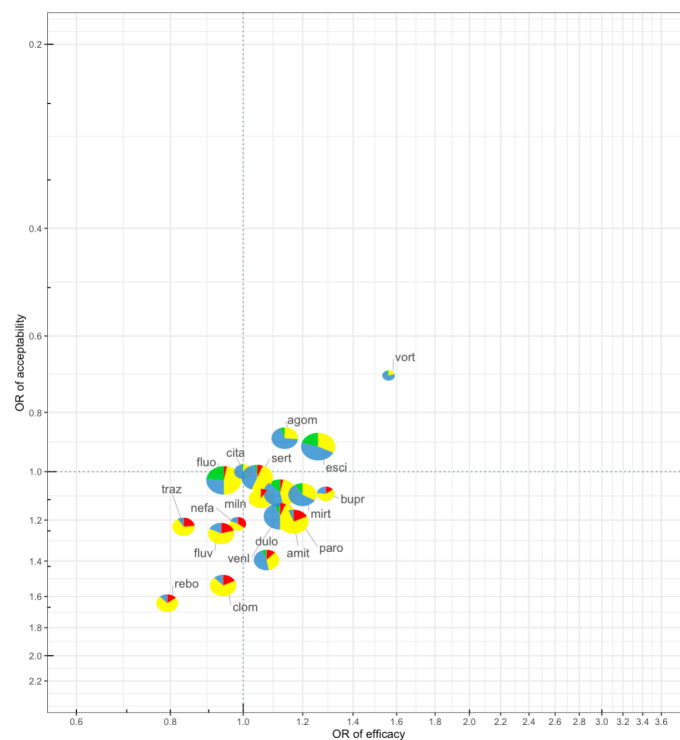

Please click the plot to see a zoomed one with the optimal ranges of x and y axis. (The zoomed plot will be displayed below.)

### 2 Dimensional Plot for Efficacy, Acceptability and Confidence in the Evidence

**Note:** (1) Drugs in the upper right area are better balanced in both efficacy and acceptability.

(2) The size of the node is proportionate to the inverse of the width of 95%CI regarding efficacy. The bigger the node, the more precise the CI is.

(3) The colors in each pie chart is proportionate to the numbers of mixed estimates for the drug in question evaluated at four levels of GRADE certainty of evidence. The four levels are: **green-high**, **blue-moderate**, **yellow-low**, **red-very low**.

### (3) Forest plots

Choose the type of RCT you would like to synthesize: the reference drug will be placebo if all the trials are included, and the reference will be citalopram if only head-to-head trials are included.

**Choose the type of RCT**

- Including placebo-controlled trials
- Only head-to-head trials

Choose the period of network meta-analysis: RCTs conducted during this period will be pooled for the analysis.

**Show the pooled evidence since**

1978

**Show the pooled evidence until**

2016

The dataset includes all published and unpublished data. If you would like to see the results from published data only, please check the box below.

**Check the publication status of RCTs**

- Pool data from published RCTs only

The Forest Plot for Efficacy

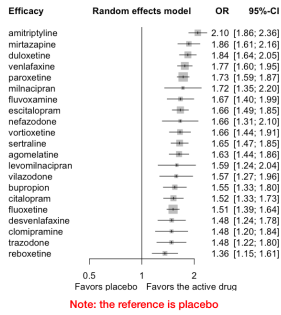

The Forest Plot for Acceptability

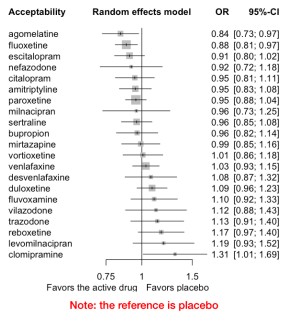

# (4) League tables

Choose the type of RCT you would like to synthesize: the reference drug will be placebo if all the trials are included, and the reference will be citalopram if only head-to-head trials are included.

**Choose the type of RCT**

- Including placebo-controlled trials
- Only head-to-head trials

Choose the period of network meta-analysis: RCTs conducted during this period will be pooled for the analysis.

**Show the pooled evidence since**

1978

**Show the pooled evidence until**

2016

The dataset includes all published and unpublished data. If you would like to see the results from published data only, please check the box below.

**Check the publication status of RCTs**

- Pool data from published RCTs only

- Network Plots and Basic Information
- 2 Dimensional Plots
- Forest Plots
- League Tables**
- Pairwise Comparisons
- Funnel Plots

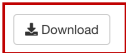

You can download league table (in the form of csv file) here.

**Note:** The lower left half shows efficacy, and the upper right half shows acceptability.

**Caution:** The league table cannot be constructed if the drugs in the efficacy network and the acceptability network do not match. So please make sure of it in the 'Basic Information', before you try to download the league table.

## The Colored League Table Showing Efficacy and Acceptability Together with Confidence in the Evidence

We assessed the confidence in the evidence every 5 years since 1990, for head-to-head trials. We believe that it should be as important to see how credible the evidence are, as with the relative effect estimates. We evaluated it at 3 levels: RCT-level, comparison-level and drug-level. At **RCT-level**, we assessed the risk of bias for each RCT based on Cochrane Collaboration risk of bias tool. At **comparison-level**, we evaluated it at each time point using *CiNeMA framework* [2] through the dedicated software. Finally, the information was synthesized at **drug-level**. We combined the efficacy, acceptability and confidence in the evidence (at drug-level) in one 2 dimensional plot at each time point.

This colored league table shows the confidence in the evidence together with efficacy and acceptability at comparison level. We colored each cell of the league table in terms of the overall confidence in evidence between two drugs: **green indicated high, blue indicated moderate, yellow indicated low, and red indicated very low** confidence in evidence.

\*\*Since the confidence in the evidence was only assessed for **head-to-head trials at 5-year interval**, this table is not as versatile as other functions. The conditions in the left sidebar are not applicable to it. **ONLY THE YEARS LISTED BELOW CAN BE SELECTED FOR THIS TABLE.**

All the evidence before the chosen year are synthesized. Please choose the ending time point.

**Show the pooled evidence until**

2016

[2] CiNeMA: Confidence in Network Meta-Analysis [Software]. Institute of Social and Preventive Medicine, University of Bern, 2017. Available from cinema.ispm.unibe.ch.

|                        |                        |                        |                        |                        |                        |                        |                        |                        |                        |                        |                        |                        |                        |                        |                        |                        |                        |
|------------------------|------------------------|------------------------|------------------------|------------------------|------------------------|------------------------|------------------------|------------------------|------------------------|------------------------|------------------------|------------------------|------------------------|------------------------|------------------------|------------------------|------------------------|
| agomelatine            | 0.73<br>(0.57 to 0.94) | 0.81<br>(0.56 to 1.18) | 0.88<br>(0.66 to 1.18) | 0.67<br>(0.43 to 0.77) | 0.63<br>(0.48 to 0.83) | 0.97<br>(0.75 to 1.25) | 0.85<br>(0.69 to 1.05) | 0.70<br>(0.52 to 0.94) | 0.80<br>(0.59 to 1.08) | 0.81<br>(0.62 to 1.05) | 0.73<br>(0.46 to 1.15) | 0.81<br>(0.57 to 1.01) | 0.64<br>(0.37 to 0.92) | 0.86<br>(0.67 to 1.11) | 0.72<br>(0.51 to 1.02) | 0.75<br>(0.69 to 0.93) | 1.27<br>(0.77 to 2.15) |
| 0.97<br>(0.76 to 1.25) | 0.81<br>(0.78 to 1.17) | 0.88<br>(0.60 to 1.50) | 0.67<br>(0.60 to 1.02) | 0.63<br>(0.56 to 1.12) | 0.97<br>(0.88 to 1.09) | 0.85<br>(0.68 to 1.38) | 0.70<br>(0.74 to 1.23) | 0.80<br>(0.88 to 1.42) | 0.81<br>(0.88 to 1.37) | 0.73<br>(0.64 to 1.54) | 0.81<br>(0.94 to 1.31) | 0.64<br>(0.64 to 1.54) | 0.86<br>(0.96 to 1.44) | 0.72<br>(0.72 to 1.34) | 0.75<br>(0.83 to 1.24) | 1.27<br>(0.61 to 2.96) |                        |
| 0.88<br>(0.59 to 1.31) | 0.91<br>(0.64 to 1.32) | 0.99<br>(0.74 to 1.40) | 0.71<br>(0.48 to 1.05) | 0.78<br>(0.58 to 1.14) | 1.19<br>(0.87 to 1.73) | 1.05<br>(0.75 to 1.46) | 0.85<br>(0.58 to 1.27) | 0.98<br>(0.69 to 1.48) | 0.99<br>(0.69 to 1.42) | 1.00<br>(0.53 to 1.53) | 0.66<br>(0.42 to 1.03) | 1.06<br>(0.74 to 1.52) | 0.88<br>(0.59 to 1.31) | 1.06<br>(0.66 to 1.27) | 0.88<br>(0.66 to 1.27) | 1.56<br>(0.88 to 2.83) |                        |
| 1.14<br>(0.87 to 1.48) | 1.17<br>(0.92 to 1.48) | 1.29<br>(0.87 to 1.91) | 0.65<br>(0.48 to 0.88) | 0.65<br>(0.53 to 0.97) | 1.19<br>(0.86 to 1.41) | 0.97<br>(0.77 to 1.21) | 0.79<br>(0.66 to 1.07) | 0.90<br>(0.66 to 1.24) | 0.82<br>(0.70 to 1.20) | 0.82<br>(0.51 to 1.31) | 0.82<br>(0.51 to 1.31) | 0.82<br>(0.47 to 1.26) | 0.86<br>(0.57 to 1.16) | 0.86<br>(0.57 to 1.16) | 0.86<br>(0.66 to 1.09) | 1.44<br>(0.82 to 2.51) |                        |
| 1.21<br>(0.81 to 1.60) | 1.24<br>(0.87 to 1.59) | 1.37<br>(0.92 to 2.05) | 1.06<br>(0.81 to 1.39) | 1.09<br>(0.85 to 1.50) | 1.69<br>(1.26 to 2.26) | 1.49<br>(1.17 to 1.89) | 1.22<br>(0.89 to 1.67) | 1.32<br>(1.02 to 1.51) | 1.40<br>(0.92 to 1.73) | 1.35<br>(0.97 to 1.68) | 1.35<br>(0.72 to 1.84) | 1.42<br>(0.83 to 1.42) | 1.42<br>(0.57 to 1.29) | 1.42<br>(0.94 to 1.99) | 1.31<br>(0.93 to 1.49) | 2.31<br>(1.13 to 3.48) |                        |
| 1.06<br>(0.81 to 1.36) | 1.09<br>(0.83 to 1.42) | 1.20<br>(0.80 to 1.81) | 0.93<br>(0.70 to 1.23) | 0.88<br>(0.65 to 1.18) | 1.53<br>(1.19 to 1.98) | 1.35<br>(1.07 to 1.71) | 1.11<br>(0.81 to 1.51) | 1.27<br>(0.92 to 1.73) | 1.15<br>(0.97 to 1.68) | 1.15<br>(0.72 to 1.84) | 1.32<br>(0.83 to 1.90) | 0.85<br>(0.57 to 1.29) | 1.36<br>(0.94 to 1.99) | 1.13<br>(0.79 to 1.63) | 1.18<br>(0.93 to 1.49) | 2.00<br>(1.13 to 3.48) |                        |
| 0.90<br>(0.71 to 1.10) | 0.93<br>(0.74 to 1.17) | 1.02<br>(0.69 to 1.33) | 0.78<br>(0.65 to 0.98) | 0.75<br>(0.57 to 0.97) | 0.85<br>(0.67 to 1.09) | 0.85<br>(0.67 to 1.09) | 0.72<br>(0.64 to 0.87) | 0.82<br>(0.61 to 1.11) | 0.81<br>(0.64 to 1.08) | 0.75<br>(0.47 to 1.18) | 0.84<br>(0.68 to 1.04) | 0.84<br>(0.58 to 1.13) | 0.84<br>(0.52 to 1.14) | 0.84<br>(0.46 to 1.43) | 0.77<br>(0.72 to 1.47) | 1.31<br>(0.82 to 1.98) |                        |
| 1.21<br>(0.98 to 1.48) | 1.24<br>(1.05 to 1.47) | 1.37<br>(0.96 to 1.95) | 1.06<br>(0.87 to 1.30) | 1.06<br>(0.80 to 1.40) | 1.33<br>(1.03 to 1.62) | 1.14<br>(0.81 to 1.26) | 0.82<br>(0.64 to 1.04) | 0.83<br>(0.73 to 1.19) | 0.84<br>(0.78 to 1.15) | 0.85<br>(0.55 to 1.30) | 0.95<br>(0.83 to 1.09) | 0.83<br>(0.45 to 1.28) | 0.83<br>(0.85 to 1.21) | 0.83<br>(0.62 to 1.13) | 0.87<br>(0.75 to 1.02) | 1.48<br>(0.88 to 2.50) |                        |
| 1.22<br>(0.92 to 1.62) | 1.25<br>(0.98 to 1.59) | 1.38<br>(0.92 to 2.07) | 1.07<br>(0.82 to 1.40) | 1.01<br>(0.76 to 1.34) | 1.15<br>(0.85 to 1.56) | 1.35<br>(1.03 to 1.70) | 0.82<br>(0.81 to 1.26) | 1.14<br>(0.84 to 1.55) | 1.35<br>(0.89 to 1.90) | 1.18<br>(0.65 to 1.67) | 1.34<br>(0.65 to 1.67) | 1.18<br>(0.92 to 1.48) | 1.18<br>(0.94 to 1.61) | 0.77<br>(0.72 to 1.47) | 0.89<br>(0.82 to 1.38) | 1.81<br>(1.03 to 3.18) |                        |
| 1.08<br>(0.80 to 1.46) | 1.11<br>(0.85 to 1.43) | 1.22<br>(0.80 to 1.85) | 0.95<br>(0.70 to 1.27) | 0.89<br>(0.67 to 1.19) | 1.02<br>(0.74 to 1.40) | 1.19<br>(0.89 to 1.59) | 0.89<br>(0.70 to 1.14) | 0.89<br>(0.66 to 1.18) | 0.91<br>(0.66 to 1.18) | 1.02<br>(0.66 to 1.18) | 1.02<br>(0.66 to 1.18) | 1.02<br>(0.66 to 1.18) | 1.02<br>(0.66 to 1.18) | 0.93<br>(0.71 to 1.22) | 0.93<br>(0.71 to 1.22) | 1.59<br>(0.90 to 2.86) |                        |
| 0.95<br>(0.73 to 1.23) | 0.97<br>(0.78 to 1.22) | 1.07<br>(0.73 to 1.58) | 0.83<br>(0.65 to 1.07) | 0.78<br>(0.60 to 1.02) | 0.96<br>(0.68 to 1.18) | 1.05<br>(0.82 to 1.34) | 0.78<br>(0.65 to 0.95) | 0.78<br>(0.66 to 1.17) | 0.88<br>(0.66 to 1.17) | 0.89<br>(0.65 to 1.22) | 0.89<br>(0.75 to 1.14) | 1.59<br>(0.91 to 2.70) |                        |
| 1.15<br>(0.75 to 1.77) | 1.19<br>(0.79 to 1.78) | 1.31<br>(0.78 to 2.19) | 1.02<br>(0.67 to 1.55) | 1.02<br>(0.62 to 1.46) | 1.09<br>(0.71 to 1.69) | 0.96<br>(0.65 to 1.41) | 0.95<br>(0.62 to 1.41) | 1.07<br>(0.62 to 1.66) | 1.07<br>(0.69 to 1.66) | 1.12<br>(0.60 to 1.85) | 1.12<br>(0.74 to 1.71) | 1.12<br>(0.77 to 1.63) | 1.12<br>(0.66 to 1.64) | 0.99<br>(0.66 to 1.40) | 0.99<br>(0.66 to 1.40) | 1.75<br>(0.90 to 3.40) |                        |
| 1.01<br>(0.82 to 1.25) | 1.04<br>(0.89 to 1.22) | 1.15<br>(0.80 to 1.65) | 0.84<br>(0.72 to 1.10) | 0.84<br>(0.68 to 1.03) | 0.96<br>(0.76 to 1.21) | 1.12<br>(0.93 to 1.36) | 0.83<br>(0.67 to 1.05) | 0.94<br>(0.67 to 1.25) | 0.94<br>(0.60 to 1.29) | 1.56<br>(0.92 to 2.63) |                        |
| 1.63<br>(1.00 to 2.60) | 1.67<br>(1.05 to 2.60) | 1.68<br>(1.02 to 2.67) | 1.26<br>(0.91 to 1.75) | 1.19<br>(0.83 to 1.70) | 1.36<br>(0.94 to 1.96) | 1.59<br>(1.13 to 2.23) | 1.18<br>(0.82 to 1.62) | 1.33<br>(0.91 to 1.94) | 1.33<br>(1.07 to 1.94) | 1.34<br>(0.97 to 2.01) | 1.41<br>(1.04 to 1.93) | 1.41<br>(0.97 to 1.93) | 1.41<br>(0.97 to 1.93) | 1.41<br>(0.97 to 1.93) | 1.41<br>(0.97 to 1.93) | 2.36<br>(1.22 to 4.36) |                        |
| 1.09<br>(0.85 to 1.38) | 1.12<br>(0.92 to 1.35) | 1.23<br>(0.85 to 1.80) | 0.96<br>(0.77 to 1.20) | 0.90<br>(0.71 to 1.14) | 1.00<br>(0.79 to 1.34) | 1.21<br>(0.97 to 1.66) | 0.90<br>(0.77 to 1.06) | 1.01<br>(0.70 to 1.32) | 1.01<br>(0.64 to 1.39) | 1.77<br>(0.86 to 2.52) |                        |
| 1.36<br>(0.99 to 1.88) | 1.40<br>(1.06 to 1.88) | 1.55<br>(1.03 to 2.32) | 1.20<br>(0.82 to 1.65) | 1.20<br>(0.82 to 1.65) | 1.29<br>(0.92 to 1.81) | 1.13<br>(0.74 to 1.56) | 1.13<br>(0.87 to 1.48) | 1.27<br>(0.81 to 1.56) | 1.77<br>(0.98 to 3.19) |                        |
| 1.01<br>(0.81 to 1.27) | 1.04<br>(0.86 to 1.27) | 1.15<br>(0.81 to 1.64) | 0.89<br>(0.72 to 1.11) | 0.89<br>(0.66 to 1.06) | 0.89<br>(0.72 to 1.11) | 1.12<br>(0.92 to 1.37) | 0.84<br>(0.73 to 0.98) | 0.84<br>(0.65 to 1.06) | 0.84<br>(0.73 to 1.23) | 0.84<br>(0.59 to 1.31) | 0.84<br>(0.85 to 1.17) | 0.84<br>(0.51 to 1.17) | 0.84<br>(0.51 to 1.17) | 0.84<br>(0.51 to 1.17) | 0.84<br>(0.51 to 1.17) | 1.72<br>(1.03 to 2.85) |                        |
| 0.73<br>(0.41 to 1.26) | 0.75<br>(0.43 to 1.30) | 0.83<br>(0.44 to 1.55) | 0.64<br>(0.36 to 1.13) | 0.60<br>(0.34 to 1.07) | 0.60<br>(0.39 to 1.22) | 0.83<br>(0.46 to 1.41) | 0.60<br>(0.35 to 1.04) | 0.60<br>(0.38 to 1.04) | 1.72<br>(0.43 to 2.11) |                        |

**Note:** The lower left half shows efficacy, and the upper right half shows acceptability.



## (5) Pairwise comparisons

Choose the type of RCT you would like to synthesize: the reference drug will be placebo if all the trials are included, and the reference will be citalopram if only head-to-head trials are included.

**Choose the type of RCT**

Including placebo-controlled trials

Only head-to-head trials

Choose the period of network meta-analysis: RCTs conducted during this period will be pooled for the analysis.

**Show the pooled evidence since**

1978

**Show the pooled evidence until**

2016

The dataset includes all published and unpublished data. If you would like to see the results from published data only, please check the box below.

**Check the publication status of RCTs**

Pool data from published RCTs only

[Network Plots and Basic Information](#) [2 Dimensional Plots](#) [Forest Plots](#) [League Tables](#) **Pairwise Comparisons** [Funnel Plots](#)

Select the 2 two drugs that you would like to compare the relative effect:

**Drug A**  **VS.** **Drug B (reference drug)**

The OR for efficacy of amitriptyline compared with fluoxetine is: 1.386 ( 1.215 to 1.582 )  
The OR for acceptability of amitriptyline compared with fluoxetine is: 1.075 ( 0.932 to 1.24 )

**Note:** Please wait a moment for the result, since it needs time to process. The OR is with reference to Drug B.

## (6) Comparison-adjusted funnel plots

Choose the type of RCT you would like to synthesize: the reference drug will be placebo if all the trials are included, and the reference will be citalopram if only head-to-head trials are included.

**Choose the type of RCT**

Including placebo-controlled trials

Only head-to-head trials

Choose the period of network meta-analysis: RCTs conducted during this period will be pooled for the analysis.

**Show the pooled evidence since**

1978

**Show the pooled evidence until**

2016

The dataset includes all published and unpublished data. If you would like to see the results from published data only, please check the box below.

**Check the publication status of RCTs**

Pool data from published RCTs only

The Comparison-adjusted Funnel Plot for Efficacy

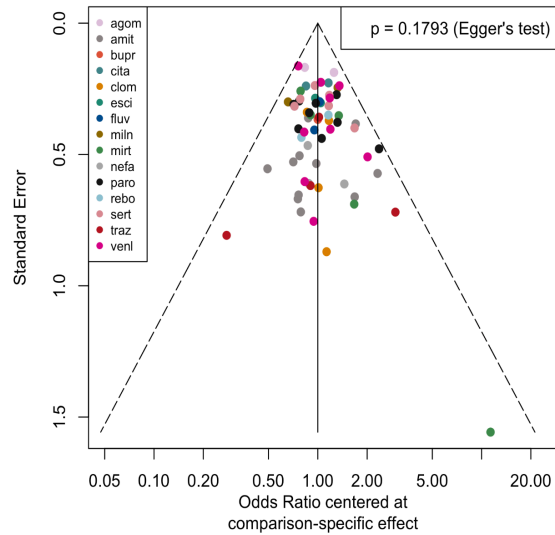

Note: only fluoxetine-controlled studies are included in this plot.

The Comparison-adjusted Funnel Plot for Acceptability

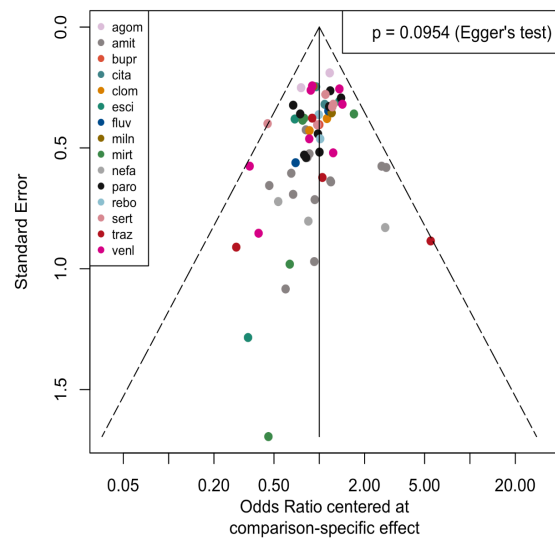

Note: only fluoxetine-controlled studies are included in this plot.
